# Supplementary material
Source: MDPI journal article supplement (https://www.mdpi.com/1424-8247/16/8/1160)
Supplement: s1 [file s1]

# **Efficacy and Key Materials of East Asian Herbal Medicine Combined with Conventional Medicine on Inflammatory Skin Lesion in Patients with *Psoriasis Vulgaris*: A Meta-Analysis, Integrated Data Mining, and Network Pharmacology**

Hee-Geun Jo <sup>1,2,†</sup>, Hyehwa Kim <sup>3,†</sup>, Eunhye Baek <sup>4</sup>, Donghun Lee <sup>1,\*</sup> and Ji Hye Hwang <sup>5,\*</sup>

**Supplmentary Figures S1A – E**

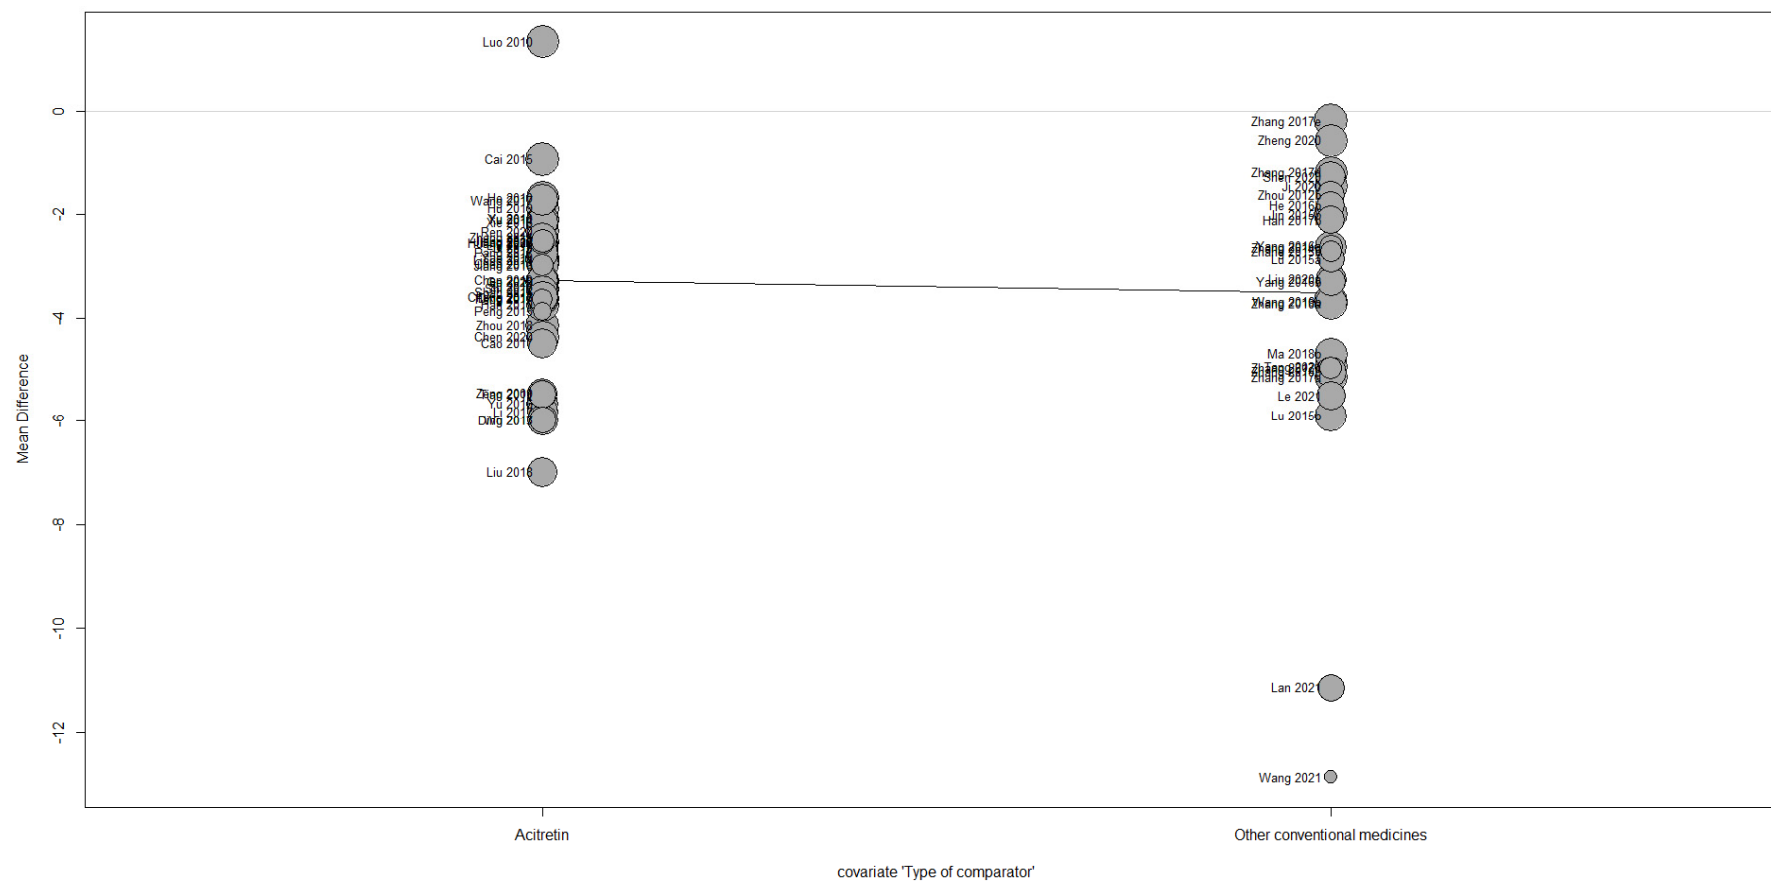

**Figure S1 (A)** Bubble plot of the meta-regression analysis for type of comparator.

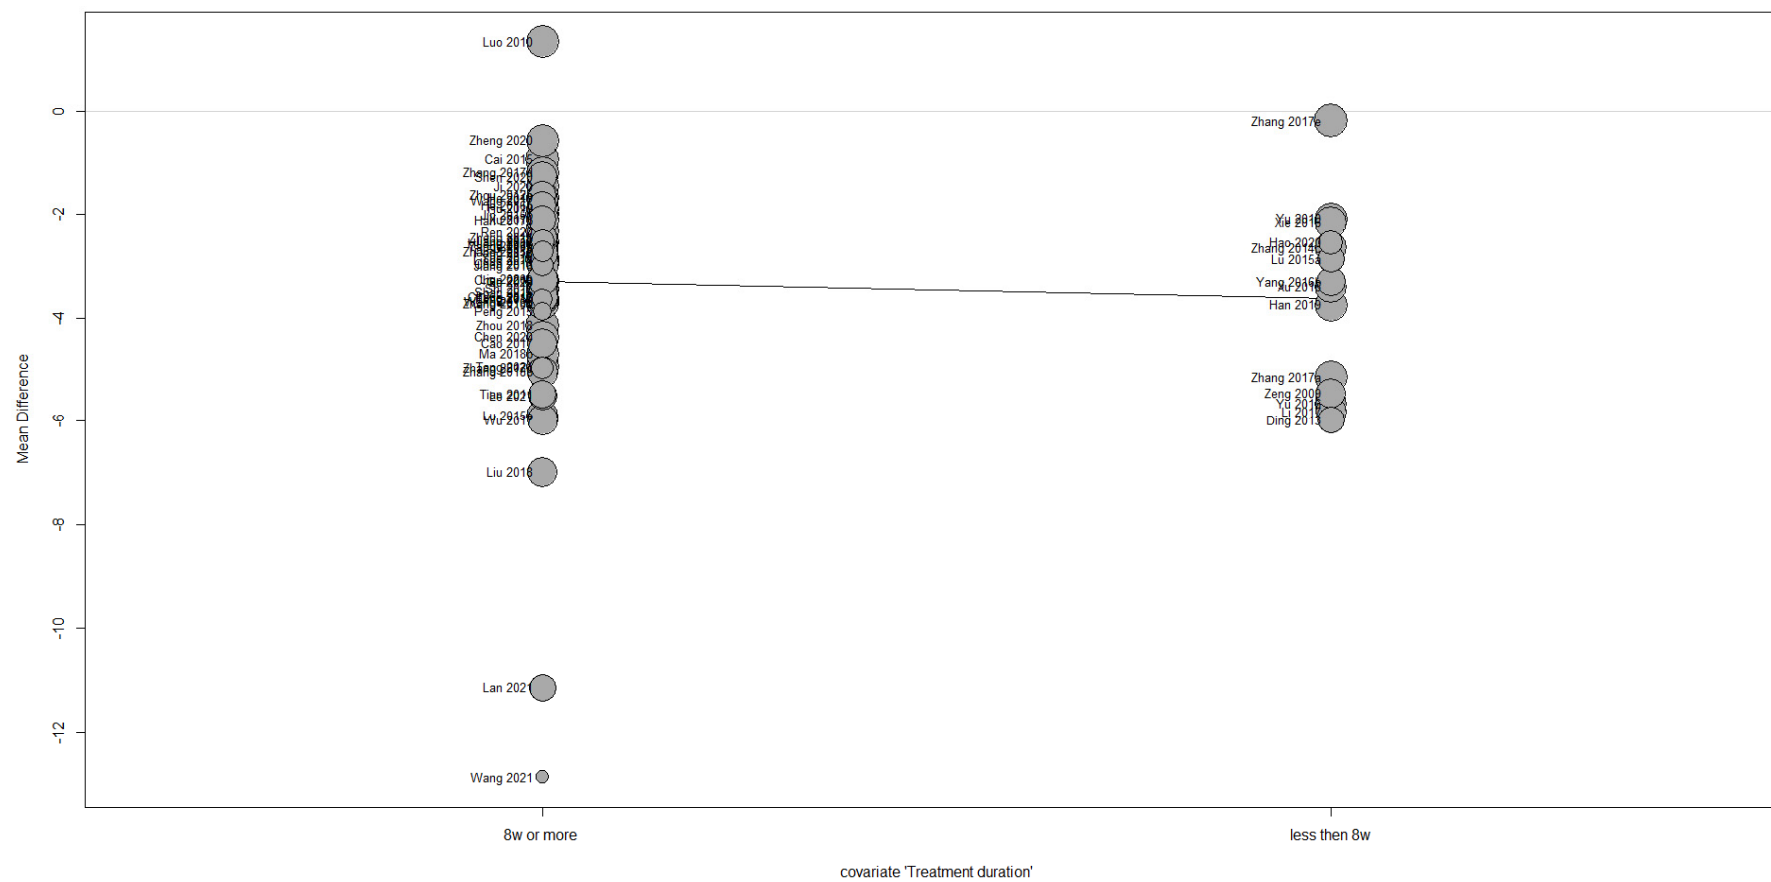

**Figure S1 (B)** Bubble plot of the meta-regression analysis for treatment duration.

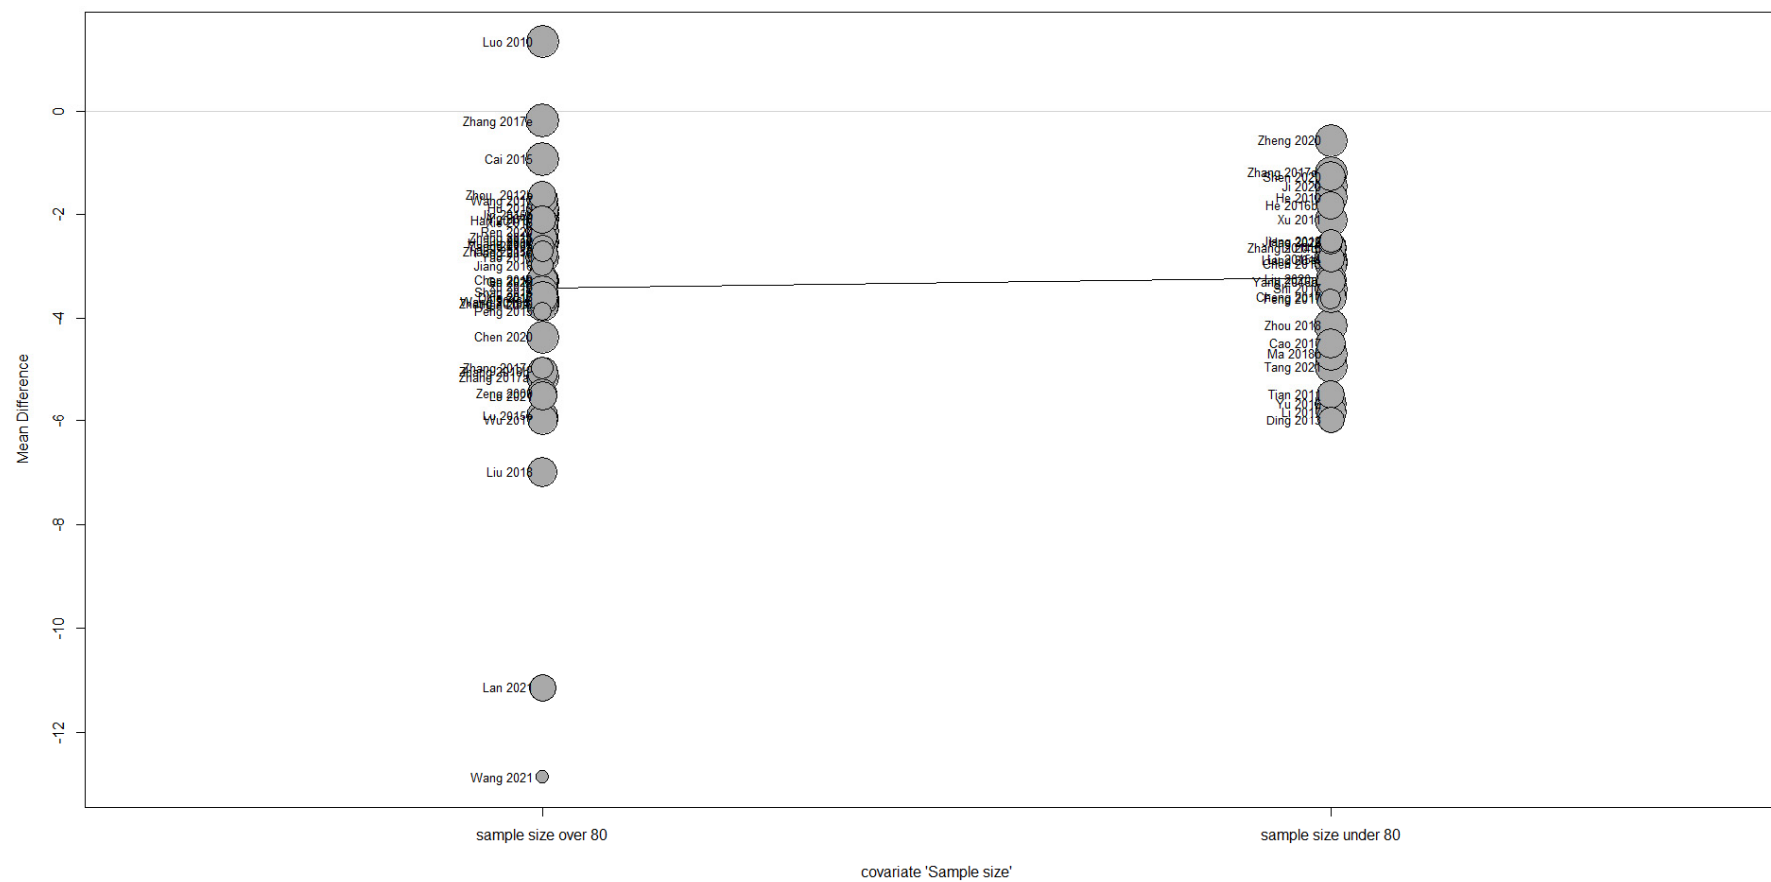

**Figure S1 (C)** Bubble plot of the meta-regression analysis for sample size.

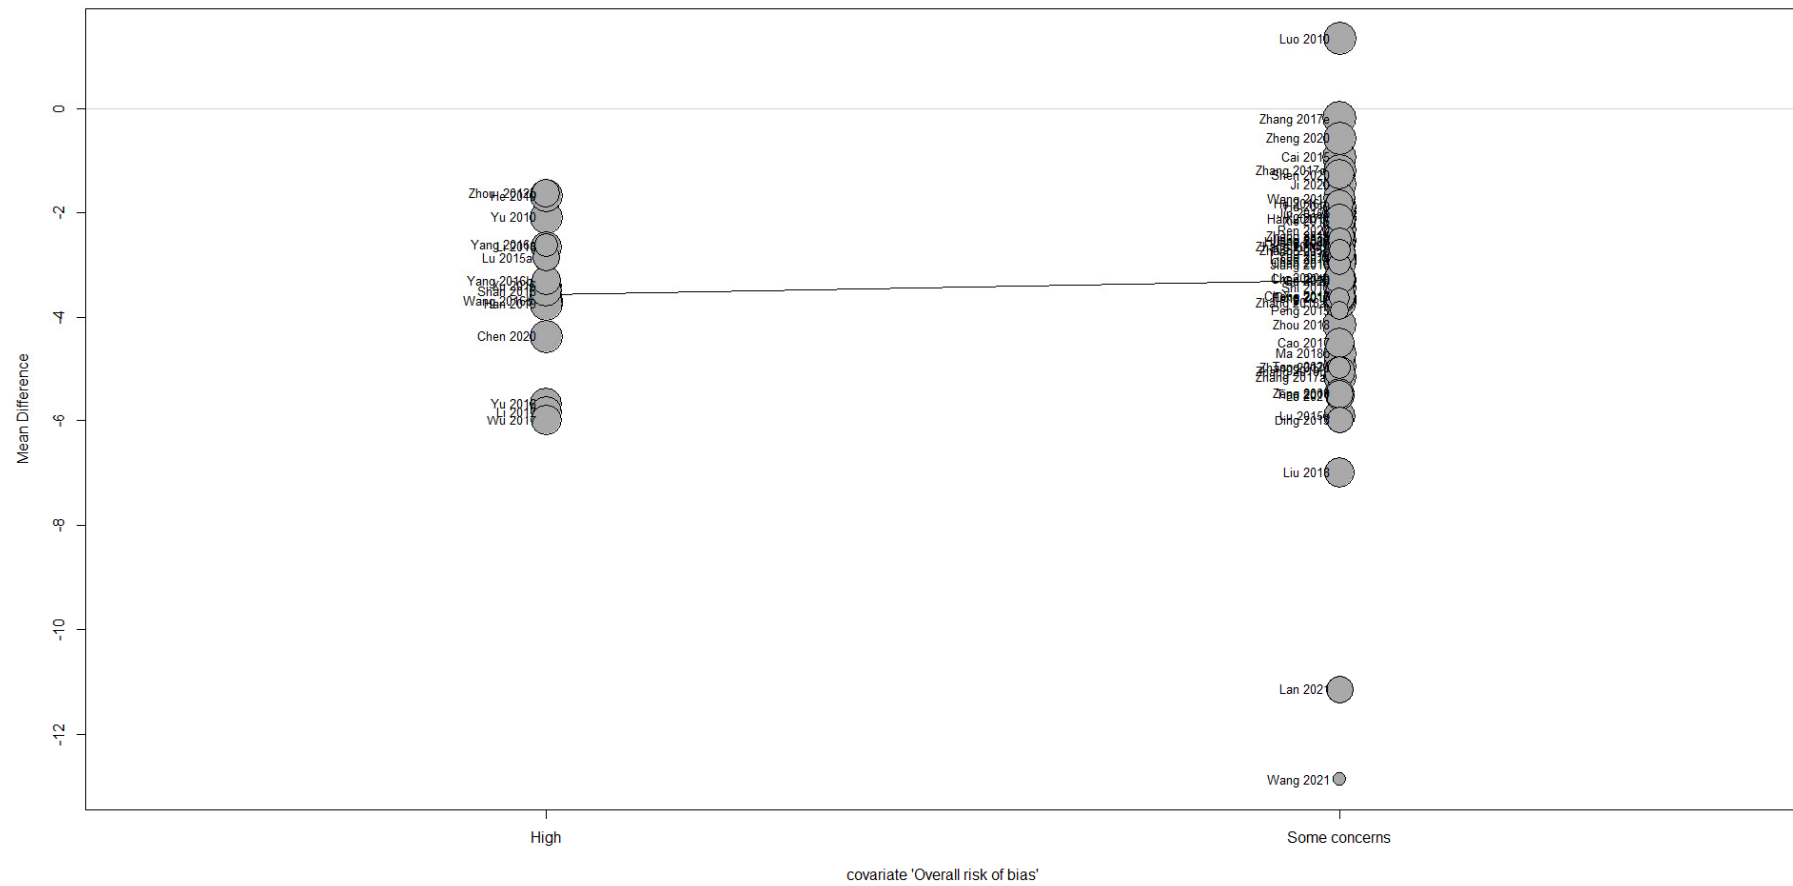

**Figure S1 (D)** Bubble plot of the meta-regression analysis for overall risk of bias.

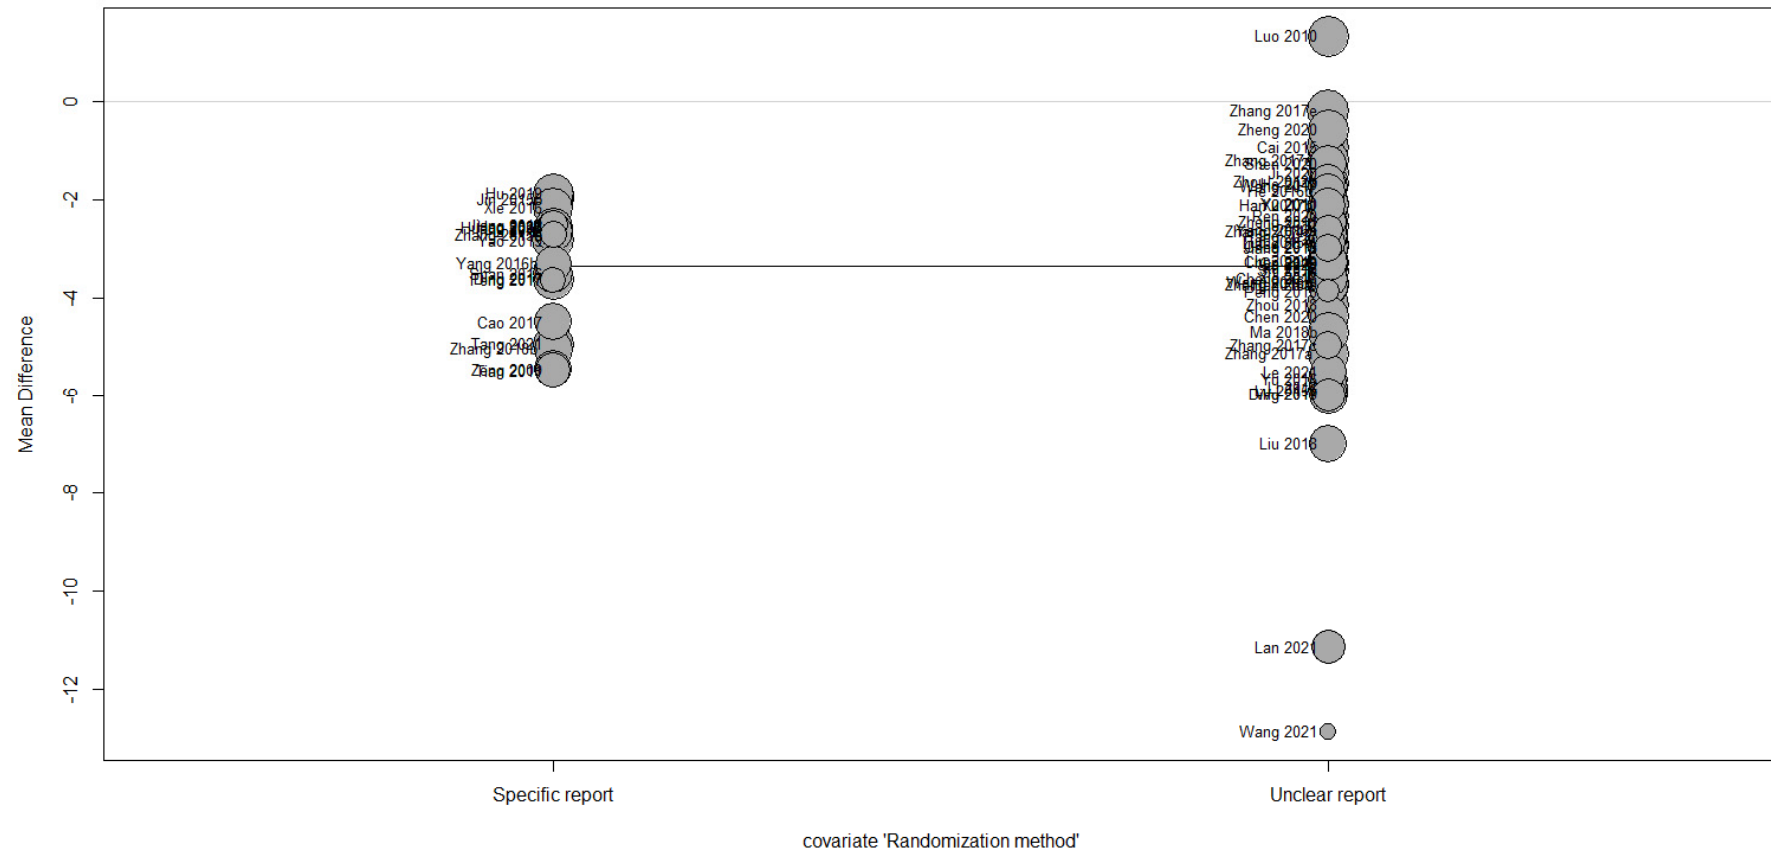

**Figure S1 (E)** Bubble plot of the meta-regression analysis for randomization method.
