# Supplementary material
Source: MDPI journal article supplement (https://www.mdpi.com/1424-8247/16/8/1160)
Supplement: s1 [file s1]

**Supplementary Table S2.** Detailed information on East Asian herbal medicine utilized as a component of integrative medicine interventions.

| Study      | EAHM prescription name | Source                  | Ingredients of EAHM prescription (Latin name)                                                                                                                                                                                                     | Ingredients of EAHM prescription (Scientific name)                                                                                                                                                                                          | Types of preparation | Quality control reported? (Y/N) | Chemical analysis reported? (Y/N) |
|------------|------------------------|-------------------------|---------------------------------------------------------------------------------------------------------------------------------------------------------------------------------------------------------------------------------------------------|---------------------------------------------------------------------------------------------------------------------------------------------------------------------------------------------------------------------------------------------|----------------------|---------------------------------|-----------------------------------|
| Che (2004) | Erdonghuoxue decoction | Prepared by Researchers | <i>Asparagi tuber, Liriopsis seu ophiopogonis tuber, Scrophulariae radix, Angelicae sinensis radix, Spatholobi caulis, Rehmanniae radix recens, Smilax glabrae rhizoma, Salviae miltiorrhizae radix, Dictamni radice cortex. Indigo pulverata</i> | Asparagus cochinchinensis (Lour.) Merr. [Asparagaceae], Ophiopogon japonicus (Thunb.) Ker Gawl. [Asparagaceae], Scrophularia ningpoensis Hemsl. [Scrophulariaceae], Angelica sinensis (Oliv.) Diels [Apiaceae], Spatholobus suberectus Dunn | Decoction            | N                               | N                                 |

|                |                               |                                   |                                                                                                                                   |                                                                                                                                                                                                                                                                                                                                                        |           |   |   |
|----------------|-------------------------------|-----------------------------------|-----------------------------------------------------------------------------------------------------------------------------------|--------------------------------------------------------------------------------------------------------------------------------------------------------------------------------------------------------------------------------------------------------------------------------------------------------------------------------------------------------|-----------|---|---|
|                |                               |                                   | <i>levis, Persicae<br/>semen</i>                                                                                                  | [Fabaceae],<br>Rehmannia glutinosa<br>(Gaertn.) DC.<br>[Orobanchaceae](Reh<br>manniae Radix<br>Recens), Smilax<br>glabra Roxb.<br>[Smilacaceae], Salvia<br>miltiorrhiza Bunge<br>[Lamiaceae],<br>Dictamnus<br>dasycarpus Turcz.<br>[Rutaceae], Persicaria<br>tinctoria (Aiton)<br>Spach<br>[Polygonaceae],<br>Prunus persica (L.)<br>Batsch [Rosaceae] |           |   |   |
| Chen<br>(2004) | Anti-<br>psoriasis<br>formula | Prepared<br>by<br>Researcher<br>s | <i>Lithospermi<br/>radix, Polygoni<br/>cuspidati rhizoma<br/>et radix,<br/>Lonicerae flos,<br/>Salviae<br/>miltiorrhizaeradix</i> | Arnebia euchroma<br>(Royle ex Benth.)<br>I.M.Johnst.<br>[Boraginaceae],<br>Reynoutria japonica<br>Houtt.<br>[Polygonaceae],                                                                                                                                                                                                                            | Decoction | N | N |

---

|                          |                         |
|--------------------------|-------------------------|
| <i>, Rehmanniae</i>      | Lonicera japonica       |
| <i>radix recens,</i>     | Thunb.                  |
| <i>Platycodonis</i>      | [Caprifoliaceae],       |
| <i>radix, Isatidis</i>   | Salvia miltiorrhiza     |
| <i>folium, Moutan</i>    | Bunge [Lamiaceae],      |
| <i>radicis cortex,</i>   | Rehmannia glutinosa     |
| <i>Paeoniae radix</i>    | (Gaertn.) DC.           |
| <i>rubra, Sophorae</i>   | [Orobanchaceae](Reh     |
| <i>flos, Angelicae</i>   | manniae Radix           |
| <i>sinensis radix,</i>   | Recens), Platycodon     |
| <i>Spatholobi caulis</i> | grandiflorus (Jacq.)    |
|                          | A.DC.                   |
|                          | [Campanulaceae],        |
|                          | Isatis tinctoria subsp. |
|                          | tinctoria               |
|                          | [Brassicaceae],         |
|                          | Paeonia × suffruticosa  |
|                          | Andrews                 |
|                          | [Paeoniaceae],          |
|                          | Paeonia anomala         |
|                          | subsp. veitchii         |
|                          | (Lynch) D.Y.Hong &      |
|                          | K.Y.Pan                 |
|                          | [Paeoniaceae],          |
|                          | Styphnolobium           |

|              |                             |                                   |                                                                                                                                                                                                                                                                                                                                      |                                                                                                                                                                                                                                                                                                                                                                   |           |   |   |
|--------------|-----------------------------|-----------------------------------|--------------------------------------------------------------------------------------------------------------------------------------------------------------------------------------------------------------------------------------------------------------------------------------------------------------------------------------|-------------------------------------------------------------------------------------------------------------------------------------------------------------------------------------------------------------------------------------------------------------------------------------------------------------------------------------------------------------------|-----------|---|---|
|              |                             |                                   |                                                                                                                                                                                                                                                                                                                                      | japonicum (L.) Schott<br>[Fabaceae], Angelica<br>sinensis (Oliv.) Diels<br>[Apiaceae],<br>Spatholobus<br>suberectus Dunn<br>[Fabaceae]                                                                                                                                                                                                                            |           |   |   |
| Xu<br>(2005) | Liangxuejied<br>u decoction | Prepared<br>by<br>Researcher<br>s | <i>Rehmanniae radix</i><br><i>recens,</i><br><i>Lithospermi</i><br><i>radix, Sophorae</i><br><i>flos,</i><br><i>Scrophulariae</i><br><i>radix, Smilax</i><br><i>glabrae rhizoma,</i><br><i>Dictamni radice</i><br><i>cortex, Sophorae</i><br><i>radix, Hedyotis</i><br><i>herba,</i><br><i>Scutellariae</i><br><i>barbatae herba</i> | Rehmannia glutinosa<br>(Gaertn.) DC.<br>[Orobanchaceae](Reh<br>manniae Radix<br>Recens), Arnebia<br>euchroma (Royle ex<br>Benth.) I.M.Johnst.<br>[Boraginaceae],<br>Styphnolobium<br>japonicum (L.) Schott<br>[Fabaceae],<br>Scrophularia<br>ningpoensis Hemsl.<br>[Scrophulariaceae],<br>Smilax glabra Roxb.<br>[Smilacaceae],<br>Dictamnus<br>dasycarpus Turcz. | Decoction | N | N |

|               |                           |                                   |                                                                                                                                                                                                                                                                                                                          |                                                                                                                                                                                                                                                                                                                          |           |   |   |
|---------------|---------------------------|-----------------------------------|--------------------------------------------------------------------------------------------------------------------------------------------------------------------------------------------------------------------------------------------------------------------------------------------------------------------------|--------------------------------------------------------------------------------------------------------------------------------------------------------------------------------------------------------------------------------------------------------------------------------------------------------------------------|-----------|---|---|
|               |                           |                                   |                                                                                                                                                                                                                                                                                                                          | [Rutaceae], Sophora<br>flavescens Aiton<br>[Fabaceae],<br>Scleromitron<br>diffusum (Willd.)<br>R.J.Wang<br>[Rubiaceae],<br>Scutellaria barbata<br>D.Don [Lamiaceae]                                                                                                                                                      |           |   |   |
| Liu<br>(2006) | Jianpiyishen<br>decoction | Prepared<br>by<br>Researcher<br>s | <i>Poria s clerotium.</i><br><i>Codonopsis</i><br><i>pilosulae radix,</i><br><i>Atractylodis</i><br><i>rhizoma alba,</i><br><i>Dolichoris semen,</i><br><i>Dioscoreae</i><br><i>rhizoma,</i><br><i>Epimedii herba,</i><br><i>Astragali radix,</i><br><i>Smilax glabrae</i><br><i>rhizoma,</i><br><i>Hedyotidis herba</i> | Poria cocos Wolf<br>[Polyporaceae],<br>Codonopsis pilosula<br>(Franch.) Nannf.<br>[Campanulaceae],<br>Atractylodes lancea<br>(Thunb.) DC.<br>[Asteraceae], Lablab<br>purpureus subsp.<br>purpureus<br>[Fabaceae], Dioscorea<br>japonica Thunb.<br>[Dioscoreaceae],<br>Epimedium<br>brevicornu Maxim.<br>[Berberidaceae], | Decoction | N | N |

|                |                    |                                                                                  |                                                                                                                                                                                                                                                                                                                                                                                                                                             |                                                                                                                                                                                                                                                                                                                                                |         |   |   |
|----------------|--------------------|----------------------------------------------------------------------------------|---------------------------------------------------------------------------------------------------------------------------------------------------------------------------------------------------------------------------------------------------------------------------------------------------------------------------------------------------------------------------------------------------------------------------------------------|------------------------------------------------------------------------------------------------------------------------------------------------------------------------------------------------------------------------------------------------------------------------------------------------------------------------------------------------|---------|---|---|
|                |                    |                                                                                  |                                                                                                                                                                                                                                                                                                                                                                                                                                             | Astragalus<br>mongholicus Bunge<br>[Fabaceae], Smilax<br>glabra Roxb.<br>[Smilacaceae],<br>Scleromitron<br>diffusum (Willd.)<br>R.J.Wang [Rubiaceae]                                                                                                                                                                                           |         |   |   |
| Chen<br>(2007) | Xiaoyin<br>granule | Commerci<br>al supplier<br>Shaanxi<br>Kanghui<br>Pharmaceu<br>tical Co.,<br>Ltd. | <i>Rehmanniae radix</i><br><i>recens, Moutan</i><br><i>radicis cortex,</i><br><i>Paeoniae radix</i><br><i>rubra, Angelicae</i><br><i>sinensis radix,</i><br><i>Sophorae radix,</i><br><i>Lonicerae flos,</i><br><i>Scrophulariae</i><br><i>radix, Arctii</i><br><i>fructus, Cicadidae</i><br><i>periostracum,</i><br><i>Dictamni radicis</i><br><i>cortex, Isatidis</i><br><i>folium, Carthami</i><br><i>flos,</i><br><i>Saposhnikoviae</i> | Rehmannia glutinosa<br>(Gaertn.) DC.<br>[Orobanchaceae](Reh<br>manniae Radix<br>Recens), Paeonia ×<br>suffruticosa Andrews<br>[Paeoniaceae],<br>Paeonia anomala<br>subsp. veitchii<br>(Lynch) D.Y.Hong &<br>K.Y.Pan<br>[Paeoniaceae],<br>Angelica sinensis<br>(Oliv.) Diels<br>[Apiaceae], Sophora<br>flavescens Aiton<br>[Fabaceae], Lonicera | Granule | N | N |

|                 |                      |                              |                                                           |                                                                                                                                                                                                                                                                                                                                                                                                                               |       |   |   |
|-----------------|----------------------|------------------------------|-----------------------------------------------------------|-------------------------------------------------------------------------------------------------------------------------------------------------------------------------------------------------------------------------------------------------------------------------------------------------------------------------------------------------------------------------------------------------------------------------------|-------|---|---|
|                 |                      |                              | <i>radix</i>                                              | japonica Thunb.<br>[Caprifoliaceae],<br>Scrophularia<br>ningpoensis Hemsl.<br>[Scrophulariaceae],<br>Arctium lappa L.<br>[Asteraceae],<br>Cryptotympana<br>dubia (Haupt)<br>[Cicadidae],<br>Dictamnus<br>dasycarpus Turcz.<br>[Rutaceae], Isatis<br>tinctoria subsp.<br>tinctoria<br>[Brassicaceae],<br>Carthamus tinctorius<br>L. [Asteraceae],<br>Saposhnikovia<br>divaricata (Turcz. ex<br>Ledeb.) Schischk.<br>[Apiaceae] |       |   |   |
| Huang<br>(2007) | Yinxieling<br>tablet | Prepared<br>by<br>Researcher | <i>Angelicae<br/>sinensis radix,<br/>Rehmanniae radix</i> | Angelica sinensis<br>(Oliv.) Diels<br>[Apiaceae],                                                                                                                                                                                                                                                                                                                                                                             | Table | N | N |

---

|   |                          |                       |
|---|--------------------------|-----------------------|
| s | <i>recens, Cnidii</i>    | Rehmannia glutinosa   |
|   | <i>rhizoma, Paeoniae</i> | (Gaertn.) DC.         |
|   | <i>radix rubra,</i>      | [Orobanchaceae](Reh   |
|   | <i>Curcumae</i>          | manniae Radix         |
|   | <i>rhizoma,</i>          | Recens),              |
|   | <i>Lithospermi</i>       | Conioselinum          |
|   | <i>radix, Smilax</i>     | anthriscoides         |
|   | <i>glabrae rhizoma,</i>  | ‘Chuanxiong’          |
|   | <i>Mume fructus,</i>     | [Apiaceae], Paeonia   |
|   | <i>Glycyrrhizae</i>      | anomala subsp.        |
|   | <i>radix et rhizoma</i>  | veitchii (Lynch)      |
|   |                          | D.Y.Hong & K.Y.Pan    |
|   |                          | [Paeoniaceae],        |
|   |                          | Curcuma phaeocaulis   |
|   |                          | Valeton               |
|   |                          | [Zingiberaceae],      |
|   |                          | Arnebia euchroma      |
|   |                          | (Royle ex Benth.)     |
|   |                          | I.M.Johnst.           |
|   |                          | [Boraginaceae],       |
|   |                          | Smilax glabra Roxb.   |
|   |                          | [Smilacaceae], Prunus |
|   |                          | mume (Siebold)        |
|   |                          | Siebold & Zucc.       |
|   |                          | [Rosaceae],           |



|                |                    |                                                                          |                                                                                                                                                                                                                                                                                                                                                       |                                                                                                                                                                                                                                                                                                                                                                                                                                                     |         |   |   |
|----------------|--------------------|--------------------------------------------------------------------------|-------------------------------------------------------------------------------------------------------------------------------------------------------------------------------------------------------------------------------------------------------------------------------------------------------------------------------------------------------|-----------------------------------------------------------------------------------------------------------------------------------------------------------------------------------------------------------------------------------------------------------------------------------------------------------------------------------------------------------------------------------------------------------------------------------------------------|---------|---|---|
|                |                    |                                                                          |                                                                                                                                                                                                                                                                                                                                                       | Glycyrrhiza uralensis<br>Fisch. ex DC.<br>[Fabaceae]                                                                                                                                                                                                                                                                                                                                                                                                |         |   |   |
| Zeng<br>(2009) | Xiaoyin<br>granule | Commercial supplier<br>Shaanxi<br>Kanghui<br>Pharmaceutical Co.,<br>Ltd. | <i>Rehmanniae radix<br/>recens, Moutan<br/>radicis cortex,<br/>Paeoniae radix<br/>rubra, Angelicae<br/>sinensis radix,<br/>Sophorae radix,<br/>Lonicerae flos,<br/>Scrophulariae<br/>radix, Arctii<br/>fructus, Cicadidae<br/>periostracum,<br/>Dictamni radicis<br/>cortex, Isatidis<br/>folium, Carthami<br/>flos,<br/>Saposhnikoviae<br/>radix</i> | Rehmannia glutinosa<br>(Gaertn.) DC.<br>[Orobanchaceae](Reh<br>manniae Radix<br>Recens), Paeonia ×<br>suffruticosa Andrews<br>[Paeoniaceae],<br>Paeonia anomala<br>subsp. veitchii<br>(Lynch) D.Y.Hong &<br>K.Y.Pan<br>[Paeoniaceae],<br>Angelica sinensis<br>(Oliv.) Diels<br>[Apiaceae], Sophora<br>flavescens Aiton<br>[Fabaceae], Lonicera<br>japonica Thunb.<br>[Caprifoliaceae],<br>Scrophularia<br>ningpoensis Hemsl.<br>[Scrophulariaceae], | Granule | N | N |

|               |                       |                                   |                                                                                                                                                                                 |                                                                                                                                                                                                                                                                                                                          |           |   |   |  |
|---------------|-----------------------|-----------------------------------|---------------------------------------------------------------------------------------------------------------------------------------------------------------------------------|--------------------------------------------------------------------------------------------------------------------------------------------------------------------------------------------------------------------------------------------------------------------------------------------------------------------------|-----------|---|---|--|
|               |                       |                                   |                                                                                                                                                                                 | Arctium lappa L.<br>[Asteraceae],<br>Cryptotympana<br>dubia (Haupt)<br>[Cicadidae],<br>Dictamnus<br>dasycarpus Turcz.<br>[Rutaceae], Isatis<br>tinctoria subsp.<br>tinctoria<br>[Brassicaceae],<br>Carthamus tinctorius<br>L. [Asteraceae],<br>Saposhnikovia<br>divaricata (Turcz. ex<br>Ledeb.) Schischk.<br>[Apiaceae] |           |   |   |  |
| Cao<br>(2010) | Yangzhen<br>decoction | Prepared<br>by<br>Researcher<br>s | <i>Rehmanniae radix</i><br><i>recens, Carthami</i><br><i>flos, Paeoniae</i><br><i>radix rubra,</i><br><i>Sparganii</i><br><i>rhizoma,</i><br><i>Curcumae</i><br><i>rhizoma,</i> | Rehmannia glutinosa<br>(Gaertn.) DC.<br>[Orobanchaceae](Reh<br>manniae Radix<br>Recens), Carthamus<br>tinctorius L.<br>[Asteraceae], Paeonia<br>anomala subsp.                                                                                                                                                           | Decoction | N | N |  |

---

|                        |                       |
|------------------------|-----------------------|
| <i>Lonicerae flos,</i> | veitchii (Lynch)      |
| <i>Smilax glabrae</i>  | D.Y.Hong & K.Y.Pan    |
| <i>rhizoma,</i>        | [Paeoniaceae],        |
| <i>Schizonepetae</i>   | Sparganium            |
| <i>spica,</i>          | stoloniferum (Buch.-  |
| <i>Saposhnikoviae</i>  | Ham. ex Graebn.)      |
| <i>radix, Tribuli</i>  | Buch.-Ham. ex Juz.    |
| <i>fructus</i>         | [Typhaceae],          |
|                        | Curcuma phaeocaulis   |
|                        | Valeton               |
|                        | [Zingiberaceae],      |
|                        | Lonicera japonica     |
|                        | Thunb.                |
|                        | [Caprifoliaceae],     |
|                        | Smilax glabra Roxb.   |
|                        | [Smilacaceae], Nepeta |
|                        | tenuifolia Benth.     |
|                        | [Lamiaceae],          |
|                        | Saposhnikovia         |
|                        | divaricata (Turcz. ex |
|                        | Ledeb.) Schischk.     |
|                        | [Apiaceae], Tribulus  |
|                        | terrestris L.         |
|                        | [Zygophyllaceae]      |

|              |                       |                                   |                                                                                                                                                                                                                                                                                                                                                                                                                                                                                                                                                                                                                   |                                                                                                                                                                                                                                                                                                                                                                                                                                                                                      |           |   |   |
|--------------|-----------------------|-----------------------------------|-------------------------------------------------------------------------------------------------------------------------------------------------------------------------------------------------------------------------------------------------------------------------------------------------------------------------------------------------------------------------------------------------------------------------------------------------------------------------------------------------------------------------------------------------------------------------------------------------------------------|--------------------------------------------------------------------------------------------------------------------------------------------------------------------------------------------------------------------------------------------------------------------------------------------------------------------------------------------------------------------------------------------------------------------------------------------------------------------------------------|-----------|---|---|
| He<br>(2010) | Xiaoranquda<br>n feng | Prepared<br>by<br>Researcher<br>s | <i>Isatidis folium,</i><br><i>Dryopteridis</i><br><i>crassirhizomatis</i><br><i>rhizoma, Taraxaci</i><br><i>herba, Paeoniae</i><br><i>radix rubra,</i><br><i>Moutan radidis</i><br><i>cortex,</i><br><i>Lithospermi</i><br><i>radix,</i><br><i>Rehmanniae radix</i><br><i>recens, Angelicae</i><br><i>sinensis radix,</i><br><i>Cnidii rhizoma,</i><br><i>Schizonepetae</i><br><i>spica,</i><br><i>Saposhnikoviae</i><br><i>radix, Dictamni</i><br><i>radicis cortex,</i><br><i>Dioscorea</i><br><i>hypoglauca,</i><br><i>Smilax glabrae</i><br><i>rhizoma,</i><br><i>Glycyrrhizae</i><br><i>radix et rhizoma</i> | Isatis tinctoria subsp.<br>tinctoria<br>[Brassicaceae],<br>Dryopteris<br>crassirhizoma Nakai<br>[Polypodiaceae],<br>Taraxacum<br>mongolicum Hand.-<br>Mazz. [Asteraceae],<br>Paeonia anomala<br>subsp. veitchii<br>(Lynch) D.Y.Hong &<br>K.Y.Pan<br>[Paeoniaceae],<br>Paeonia × suffruticosa<br>Andrews<br>[Paeoniaceae],<br>Arnebia euchroma<br>(Royle ex Benth.)<br>I.M.Johnst.<br>[Boraginaceae],<br>Rehmannia glutinosa<br>(Gaertn.) DC.<br>[Orobanchaceae](Reh<br>manniae Radix | Decoction | N | N |
|--------------|-----------------------|-----------------------------------|-------------------------------------------------------------------------------------------------------------------------------------------------------------------------------------------------------------------------------------------------------------------------------------------------------------------------------------------------------------------------------------------------------------------------------------------------------------------------------------------------------------------------------------------------------------------------------------------------------------------|--------------------------------------------------------------------------------------------------------------------------------------------------------------------------------------------------------------------------------------------------------------------------------------------------------------------------------------------------------------------------------------------------------------------------------------------------------------------------------------|-----------|---|---|

---

Recens), *Angelica*  
*sinensis* (Oliv.) Diels  
[Apiaceae],  
*Conioselinum*  
*anthriscoides*  
'Chuanxiong'  
[Apiaceae], *Nepeta*  
*tenuifolia* Benth.  
[Lamiaceae],  
*Saposhnikovia*  
*divaricata* (Turcz. ex  
Ledeb.) Schischk.  
[Apiaceae],  
*Dictamnus*  
*dasycarpus* Turcz.  
[Rutaceae], *Dioscorea*  
*collettii* var.  
*hypoglauca* (Palib.)  
S.J.Pei & C.T.Ting  
[Dioscoreaceae],  
*Smilax glabra* Roxb.  
[Smilacaceae],  
*Glycyrrhiza uralensis*  
Fisch. ex DC.  
[Fabaceae]

|               |                           |                                   |                                                                                                                                                                                                                                                                                                                                                                                                                                                                                                                        |                                                                                                                                                                                                                                                                                                                                                                                                                                                                                                                                                                                                                                                                               |           |   |   |
|---------------|---------------------------|-----------------------------------|------------------------------------------------------------------------------------------------------------------------------------------------------------------------------------------------------------------------------------------------------------------------------------------------------------------------------------------------------------------------------------------------------------------------------------------------------------------------------------------------------------------------|-------------------------------------------------------------------------------------------------------------------------------------------------------------------------------------------------------------------------------------------------------------------------------------------------------------------------------------------------------------------------------------------------------------------------------------------------------------------------------------------------------------------------------------------------------------------------------------------------------------------------------------------------------------------------------|-----------|---|---|
| Hua<br>(2010) | Qingyinjiedu<br>decoction | Prepared<br>by<br>Researcher<br>s | <i>Smilax glabrae</i><br><i>rhizoma, Indigo</i><br><i>pulverata levis,</i><br><i>Lonicerae flos,</i><br><i>Salviae</i><br><i>miltiorrhizae</i><br><i>radix, Gardenia</i><br><i>jasminoides,</i><br><i>Smilacis chinae</i><br><i>rhizoma,</i><br><i>Euphorbia</i><br><i>humifusa,</i><br><i>Gypsum</i><br><i>fibrosum,</i><br><i>Scutellariae radix,</i><br><i>Rehmanniae radix</i><br><i>recens, Sophorae</i><br><i>Radix, Dictamni</i><br><i>radicis cortex,</i><br><i>Curcumae radix,</i><br><i>Hedyotidis herba</i> | <i>Smilax glabra</i> Roxb.<br>[Smilacaceae],<br><i>Persicaria tinctoria</i><br>(Aiton) Spach<br>[Polygonaceae],<br><i>Lonicera japonica</i><br>Thunb.<br>[Caprifoliaceae],<br><i>Salvia miltiorrhiza</i><br>Bunge [Lamiaceae],<br><i>Gardenia jasminoides</i><br>J.Ellis [Rubiaceae],<br><i>Smilax china</i> L.<br>[Smilacaceae],<br><i>Euphorbia hirta</i> L.<br>[Euphorbiaceae],<br><i>Gypsum Fibrosum,</i><br><i>Scutellaria baicalensis</i><br>Georgi [Lamiaceae],<br><i>Rehmannia glutinosa</i><br>(Gaertn.) DC.<br>[Orobanchaceae]( <i>Reh</i><br><i>manniae Radix</i><br><i>Recens</i> ), <i>Sophora</i><br><i>flavescens</i> Aiton<br>[Fabaceae],<br><i>Dictamnus</i> | Decoction | N | N |
|---------------|---------------------------|-----------------------------------|------------------------------------------------------------------------------------------------------------------------------------------------------------------------------------------------------------------------------------------------------------------------------------------------------------------------------------------------------------------------------------------------------------------------------------------------------------------------------------------------------------------------|-------------------------------------------------------------------------------------------------------------------------------------------------------------------------------------------------------------------------------------------------------------------------------------------------------------------------------------------------------------------------------------------------------------------------------------------------------------------------------------------------------------------------------------------------------------------------------------------------------------------------------------------------------------------------------|-----------|---|---|

|               |                      |                                                                                                          |                                                                                                                                                                                                                                                                                                                                                                                                                                                                                              |                                                                                                                                                                                                                                                                                                                                                                                                                              |         |   |                                                                                                                                                   |
|---------------|----------------------|----------------------------------------------------------------------------------------------------------|----------------------------------------------------------------------------------------------------------------------------------------------------------------------------------------------------------------------------------------------------------------------------------------------------------------------------------------------------------------------------------------------------------------------------------------------------------------------------------------------|------------------------------------------------------------------------------------------------------------------------------------------------------------------------------------------------------------------------------------------------------------------------------------------------------------------------------------------------------------------------------------------------------------------------------|---------|---|---------------------------------------------------------------------------------------------------------------------------------------------------|
|               |                      |                                                                                                          |                                                                                                                                                                                                                                                                                                                                                                                                                                                                                              |                                                                                                                                                                                                                                                                                                                                                                                                                              |         |   | dasycarpus Turcz.<br>[Rutaceae], Curcuma<br>phaeocaulis Valetton<br>[Zingiberaceae],<br>Scleromitron<br>diffusum (Willd.)<br>R.J.Wang [Rubiaceae] |
| Luo<br>(2010) | Piminxiao<br>capsule | Pharmaceu<br>tical<br>product<br>(specific<br>commerca<br>l supplier<br>informatio<br>n not<br>reported) | <i>Sophorae radix,</i><br><i>Atractylodis</i><br><i>rhizoma,</i><br><i>Saposhnikoviae</i><br><i>radix,</i><br><i>Schizonepetae</i><br><i>spica, Tribuli</i><br><i>fructus, Dictamni</i><br><i>radicis cortex,</i><br><i>Cnidi fructus,</i><br><i>Xanthii fructus,</i><br><i>Scolopendra,</i><br><i>Indigo pulverata</i><br><i>levis, Taraxaci</i><br><i>herba, Viola</i><br><i>herba,</i><br><i>Scutellariae radix,</i><br><i>Phellodendri</i><br><i>cortex, Coptis</i><br><i>chinensis,</i> | Sophora flavescens<br>Aiton [Fabaceae],<br>Atractylodes lancea<br>(Thunb.) DC.<br>[Asteraceae](Atractyl<br>odis Rhizoma),<br>Saposhnikovia<br>divaricata (Turcz. ex<br>Ledeb.) Schischk.<br>[Apiaceae], Nepeta<br>tenuifolia Benth.<br>[Lamiaceae], Tribulus<br>terrestris L.<br>[Zygophyllaceae],<br>Dictamnus<br>dasycarpus Turcz.<br>[Rutaceae], Cnidium<br>monnieri (L.) Cusson<br>[Apiaceae], Xanthium<br>strumarium L. | Capsule | N | N                                                                                                                                                 |

---

|                         |                         |
|-------------------------|-------------------------|
| <i>Cicadidae</i>        | [Asteraceae],           |
| <i>periostracum,</i>    | Scolopendra             |
| <i>Rehmanniae radix</i> | subspinipes mutilans    |
| <i>recens, Moutan</i>   | Linné Koch              |
| <i>radicis cortex,</i>  | [Scolopendridae],       |
| <i>Tamarics</i>         | Persicaria tinctoria    |
| <i>cacumen,</i>         | (Aiton) Spach           |
| <i>Lithospermi</i>      | [Polygonaceae],         |
| <i>radix, Lycii</i>     | Taraxacum               |
| <i>radicis cortex</i>   | mongolicum Hand.-       |
|                         | Mazz. [Asteraceae],     |
|                         | Viola mandshurica       |
|                         | W.Becker [Violaceae],   |
|                         | Scutellaria baicalensis |
|                         | Georgi [Lamiaceae],     |
|                         | Phellodendron           |
|                         | chinense                |
|                         | C.K.Schneid.            |
|                         | [Rutaceae], Coptis      |
|                         | chinensis Franch.       |
|                         | [Ranunculaceae],        |
|                         | Cryptotympana           |
|                         | dubia (Haupt)           |
|                         | [Cicadidae],            |
|                         | Rehmannia glutinosa     |
|                         | (Gaertn.) DC.           |
|                         | [Orobanchaceae](Reh     |



|              |                           |                                                                                         |                                                                                                                                                                                                                      |                                                                                                                                                                                                                                                                                                        |         |   |   |
|--------------|---------------------------|-----------------------------------------------------------------------------------------|----------------------------------------------------------------------------------------------------------------------------------------------------------------------------------------------------------------------|--------------------------------------------------------------------------------------------------------------------------------------------------------------------------------------------------------------------------------------------------------------------------------------------------------|---------|---|---|
|              |                           |                                                                                         |                                                                                                                                                                                                                      | manniae Radix<br>Recens), Paeonia ×<br>suffruticosa Andrews<br>[Paeoniaceae],<br>Tamarix chinensis<br>Lour. [Tamaricaceae],<br>Arnebia euchroma<br>(Royle ex Benth.)<br>I.M.Johnst.<br>[Boraginaceae],<br>Lycium barbarum L.<br>[Solanaceae]                                                           |         |   |   |
| Yu<br>(2010) | Runzaozhiya<br>ng capsule | Commerci<br>al supplier<br>Guizhou<br>Tongji<br>Tang<br>Pharmaceu<br>tical Co.,<br>Ltd. | <i>Polygoni</i><br><i>Multiflori radix</i> ,<br><i>Rehmanniae radix</i><br><i>recens</i> , <i>Mori</i><br><i>folium</i> , <i>Sophorae</i><br><i>radix</i> , <i>Girardiana</i><br><i>heterophylla</i><br><i>decne</i> | Reynoutria multiflora<br>(Thunb.) Moldenke<br>[Polygonaceae],<br>Rehmannia glutinosa<br>(Gaertn.) DC.<br>[Orobanchaceae](Reh<br>manniae Radix<br>Recens), Morus alba<br>L. [Moraceae],<br>Sophora flavescens<br>Aiton [Fabaceae],<br>Girardinia<br>diversifolia subsp.<br>diversifolia<br>[Urticaceae] | Capsule | N | N |

|               |                                 |                                   |                                                                                                                                                                                                                                                                                                                                                                                                                                                        |                                                                                                                                                                                                                                                                                                                                                                                                                                                                                                                                                                                                         |         |   |   |
|---------------|---------------------------------|-----------------------------------|--------------------------------------------------------------------------------------------------------------------------------------------------------------------------------------------------------------------------------------------------------------------------------------------------------------------------------------------------------------------------------------------------------------------------------------------------------|---------------------------------------------------------------------------------------------------------------------------------------------------------------------------------------------------------------------------------------------------------------------------------------------------------------------------------------------------------------------------------------------------------------------------------------------------------------------------------------------------------------------------------------------------------------------------------------------------------|---------|---|---|
| Liu<br>(2011) | Fangfengtong<br>sheng<br>powder | Prepared<br>by<br>Researcher<br>s | <i>Cnidii rhizoma,</i><br><i>Angelicae</i><br><i>sinensis radix,</i><br><i>Paeonia lactiflora,</i><br><i>Rhei radix et</i><br><i>rhizoma, Gypsum</i><br><i>fibrosum,</i><br><i>Scutellariae radix,</i><br><i>Gardenia</i><br><i>jasminoides,</i><br><i>Forsythiae</i><br><i>fructus, Natrii</i><br><i>sulfas,</i><br><i>Saposhnikoviae</i><br><i>radix, Menthae</i><br><i>herba,</i><br><i>Schizonepetae</i><br><i>spica, Ephedrae</i><br><i>herba</i> | Conioselinum<br>anthriscoides<br>‘Chuanxiong’<br>[Apiaceae], Angelica<br>sinensis (Oliv.) Diels<br>[Apiaceae], Paeonia<br>lactiflora Pall.<br>[Paeoniaceae](Paeoni<br>a lactiflora Alba),<br>Rheum officinale<br>Baill. [Polygonaceae],<br>Gypsum Fibrosum,<br>Scutellaria baicalensis<br>Georgi [Lamiaceae],<br>Gardenia jasminoides<br>J.Ellis [Rubiaceae],<br>Forsythia suspensa<br>(Thunb.) Vahl<br>[Oleaceae], Natrii<br>sulfas, Saposhnikovia<br>divaricata (Turcz. ex<br>Ledeb.) Schischk.<br>[Apiaceae], Mentha<br>canadensis L.<br>[Lamiaceae],<br>Mentha canadensis L.<br>[Lamiaceae], Nepeta | Granule | N | N |
|               |                                 |                                   |                                                                                                                                                                                                                                                                                                                                                                                                                                                        |                                                                                                                                                                                                                                                                                                                                                                                                                                                                                                                                                                                                         |         |   |   |

|              |                          |                                   |                                                                                                                                                                                                                                                                                                                                                                                                  |                                                                                                                                                                                                                                                                                                                                                                                                                                        |           |   |   |
|--------------|--------------------------|-----------------------------------|--------------------------------------------------------------------------------------------------------------------------------------------------------------------------------------------------------------------------------------------------------------------------------------------------------------------------------------------------------------------------------------------------|----------------------------------------------------------------------------------------------------------------------------------------------------------------------------------------------------------------------------------------------------------------------------------------------------------------------------------------------------------------------------------------------------------------------------------------|-----------|---|---|
|              |                          |                                   |                                                                                                                                                                                                                                                                                                                                                                                                  | tenuifolia Benth.<br>[Lamiaceae], Ephedra<br>sinica Stapf<br>[Ephedraceae]                                                                                                                                                                                                                                                                                                                                                             |           |   |   |
| Lu<br>(2011) | Qingrejiedu<br>decoction | Prepared<br>by<br>Researcher<br>s | <i>Moutan radidis</i><br><i>cortex, Paeoniae</i><br><i>radix rubra,</i><br><i>Isatidis radix,</i><br><i>Gardenia</i><br><i>jasminoides,</i><br><i>Smilax glabrae</i><br><i>rhizoma,</i><br><i>Sophorae flos,</i><br><i>Dictamni radidis</i><br><i>cortex, Angelicae</i><br><i>sinensis radix,</i><br><i>Spatholobi caulis,</i><br><i>Tripterygium</i><br><i>wilfordii,</i><br><i>Scolopendra</i> | Paeonia × suffruticosa<br>Andrews<br>[Paeoniaceae],<br>Paeonia anomala<br>subsp. veitchii<br>(Lynch) D.Y.Hong &<br>K.Y.Pan<br>[Paeoniaceae], Isatis<br>tinctoria subsp.<br>tinctoria<br>[Brassicaceae](Isatidis<br>Radix), Gardenia<br>jasminoides J.Ellis<br>[Rubiaceae], Smilax<br>glabra Roxb.<br>[Smilacaceae],<br>Styphnolobium<br>japonicum (L.) Schott<br>[Fabaceae],<br>Dictamnus<br>dasycarpus Turcz.<br>[Rutaceae], Angelica | Decoction | N | N |

|                |                               |                                   |                                                                                                                                                                                                                                                                                                                                                                                                                                                            |                                                                                                                                                                                                                                                                                                   |           |   |   |
|----------------|-------------------------------|-----------------------------------|------------------------------------------------------------------------------------------------------------------------------------------------------------------------------------------------------------------------------------------------------------------------------------------------------------------------------------------------------------------------------------------------------------------------------------------------------------|---------------------------------------------------------------------------------------------------------------------------------------------------------------------------------------------------------------------------------------------------------------------------------------------------|-----------|---|---|
|                |                               |                                   |                                                                                                                                                                                                                                                                                                                                                                                                                                                            | sinensis (Oliv.) Diels<br>[Apiaceae],<br>Spatholobus<br>suberectus Dunn<br>[Fabaceae],<br>Tripterygium<br>wilfordii Hook.f.<br>[Celastraceae],<br>Scolopendra<br>subspinipes mutilans<br>Linné Koch<br>[Scolopendridae]                                                                           |           |   |   |
| Tian<br>(2011) | Qingfeiliangx<br>ue decoction | Prepared<br>by<br>Researcher<br>s | <i>Bubalus bubalis</i> ,<br><i>Rehmanniae radix</i><br><i>recens</i> , <i>Paeoniae</i><br><i>radix rubra</i> ,<br><i>Moutan radice</i><br><i>cortex</i> , <i>Angelicae</i><br><i>sinensis radix</i> ,<br><i>Dictamni radice</i><br><i>cortex</i> , <i>Spatholobi</i><br><i>caulis</i> , <i>Smilax</i><br><i>glabrae rhizoma</i> ,<br><i>Lithospermi</i><br><i>radix</i> , <i>Lonicerae</i><br><i>flos</i> , <i>Scutellariae</i><br><i>barbatae herba</i> , | Bubalus bubalis<br>Linné [Bovidae],<br>Rehmannia glutinosa<br>(Gaertn.) DC.<br>[Orobanchaceae](Reh<br>manniae Radix<br>Recens), Paeonia<br>anomala subsp.<br>veitchii (Lynch)<br>D.Y.Hong & K.Y.Pan<br>[Paeoniaceae],<br>Paeonia × suffruticosa<br>Andrews<br>[Paeoniaceae],<br>Angelica sinensis | Decoction | N | N |

---

|                          |                      |
|--------------------------|----------------------|
| <i>Hedyotidis herba,</i> | (Oliv.) Diels        |
| <i>Zaocys, Salviae</i>   | [Apiaceae],          |
| <i>Miltiorrhizae</i>     | Dictamnus            |
| <i>radix,</i>            | dasycarpus Turcz.    |
| <i>Glycyrrhizae</i>      | [Rutaceae],          |
| <i>radix et rhizoma</i>  | Spatholobus          |
|                          | suberectus Dunn      |
|                          | [Fabaceae], Smilax   |
|                          | glabra Roxb.         |
|                          | [Smilacaceae],       |
|                          | Arnebia euchroma     |
|                          | (Royle ex Benth.)    |
|                          | I.M.Johnst.          |
|                          | [Boraginaceae],      |
|                          | Lonicera japonica    |
|                          | Thunb.               |
|                          | [Caprifoliaceae],    |
|                          | Scutellaria barbata  |
|                          | D.Don [Lamiaceae],   |
|                          | Scleromitron         |
|                          | diffusum (Willd.)    |
|                          | R.J.Wang             |
|                          | [Rubiaceae], Zaocys  |
|                          | dhumnades Cantor     |
|                          | [Colubridae], Salvia |
|                          | miltiorrhiza Bunge   |
|                          | [Lamiaceae],         |

|              |             |                                   |                                                                                                                                                                                                                                                                                                                                             |                                                                                                                                                                                                                                                                                                                                                                                                                                  |           |   |   |
|--------------|-------------|-----------------------------------|---------------------------------------------------------------------------------------------------------------------------------------------------------------------------------------------------------------------------------------------------------------------------------------------------------------------------------------------|----------------------------------------------------------------------------------------------------------------------------------------------------------------------------------------------------------------------------------------------------------------------------------------------------------------------------------------------------------------------------------------------------------------------------------|-----------|---|---|
|              |             |                                   |                                                                                                                                                                                                                                                                                                                                             | Glycyrrhiza uralensis<br>Fisch. ex DC.<br>[Fabaceae]                                                                                                                                                                                                                                                                                                                                                                             |           |   |   |
| Xu<br>(2011) | Qingxuanyin | Prepared<br>by<br>Researcher<br>s | <i>Rehmanniae radix<br/>recens, Lonicerae<br/>flos, Forsythiae<br/>fructus,<br/>Anemarrhenae<br/>rhizoma,<br/>Dictamni radices<br/>cortex, Sophorae<br/>radix, Cicadidae<br/>periostracum,<br/>Tribuli fructus,<br/>Moutan radices<br/>cortex, Paeoniae<br/>radix rubra,<br/>Gypsum<br/>fibrosum,<br/>Glycyrrhizae<br/>radix et rhizoma</i> | Rehmannia glutinosa<br>(Gaertn.) DC.<br>[Orobanchaceae](Reh<br>manniae Radix<br>Recens), Lonicera<br>japonica Thunb.<br>[Caprifoliaceae],<br>Forsythia suspensa<br>(Thunb.) Vahl<br>[Oleaceae],<br>Anemarrhena<br>asphodeloides Bunge<br>[Asparagaceae],<br>Dictamnus<br>dasycarpus Turcz.<br>[Rutaceae], Sophora<br>flavescens Aiton<br>[Fabaceae],<br>Cryptotympana<br>dubia (Haupt)<br>[Cicadidae], Tribulus<br>terrestris L. | Decoction | N | N |

|               |                    |                                                                                  |                                                                                                                                                                                                                                                                                           |                                                                                                                                                                                                                                                                             |         |   |   |
|---------------|--------------------|----------------------------------------------------------------------------------|-------------------------------------------------------------------------------------------------------------------------------------------------------------------------------------------------------------------------------------------------------------------------------------------|-----------------------------------------------------------------------------------------------------------------------------------------------------------------------------------------------------------------------------------------------------------------------------|---------|---|---|
|               |                    |                                                                                  |                                                                                                                                                                                                                                                                                           | [Zygophyllaceae],<br>Paeonia × suffruticosa<br>Andrews<br>[Paeoniaceae],<br>Paeonia anomala<br>subsp. veitchii<br>(Lynch) D.Y.Hong &<br>K.Y.Pan<br>[Paeoniaceae],<br>Gypsum Fibrosum,<br>Glycyrrhiza uralensis<br>Fisch. ex DC.<br>[Fabaceae]                               |         |   |   |
| Yao<br>(2011) | Xiaoyin<br>granule | Commerci<br>al supplier<br>Shaanxi<br>Kanghui<br>Pharmaceu<br>tical Co.,<br>Ltd. | <i>Rehmanniae radix<br/>recens, Moutan<br/>radicis cortex,<br/>Paeoniae radix<br/>rubra, Angelicae<br/>sinensis radix,<br/>Sophorae radix,<br/>Lonicerae flos,<br/>Scrophulariae<br/>radix, Arctii<br/>fructus, Cicadidae<br/>periostracum,<br/>Dictamni radicis<br/>cortex, Isatidis</i> | Rehmannia glutinosa<br>(Gaertn.) DC.<br>[Orobanchaceae](Reh<br>manniae Radix<br>Recens), Paeonia ×<br>suffruticosa Andrews<br>[Paeoniaceae],<br>Paeonia anomala<br>subsp. veitchii<br>(Lynch) D.Y.Hong &<br>K.Y.Pan<br>[Paeoniaceae],<br>Angelica sinensis<br>(Oliv.) Diels | Granule | N | N |

|                 |                          |                |                                                                                  |                                                                                                                                                                                                                                                                                                                                                                                                                                                                                                  |           |   |   |  |
|-----------------|--------------------------|----------------|----------------------------------------------------------------------------------|--------------------------------------------------------------------------------------------------------------------------------------------------------------------------------------------------------------------------------------------------------------------------------------------------------------------------------------------------------------------------------------------------------------------------------------------------------------------------------------------------|-----------|---|---|--|
|                 |                          |                | <i>folium, Carthami</i><br><i>flos,</i><br><i>Saposhnikoviae</i><br><i>radix</i> | [Apiaceae], Sophora<br>flavescens Aiton<br>[Fabaceae], Lonicera<br>japonica Thunb.<br>[Caprifoliaceae],<br>Scrophularia<br>ningpoensis Hemsl.<br>[Scrophulariaceae],<br>Arctium lappa L.<br>[Asteraceae],<br>Cryptotympana<br>dubia (Haupt)<br>[Cicadidae],<br>Dictamnus<br>dasycarpus Turcz.<br>[Rutaceae], Isatis<br>tinctoria subsp.<br>tinctoria<br>[Brassicaceae],<br>Carthamus tinctorius<br>L. [Asteraceae],<br>Saposhnikovia<br>divaricata (Turcz. ex<br>Ledeb.) Schischk.<br>[Apiaceae] |           |   |   |  |
| Zheng<br>(2011) | Xiaoyinkeji<br>decoction | Prepared<br>by | <i>Bubalus bubalis,</i><br><i>Rehmanniae radix</i>                               | Bubalus bubalis<br>Linné [Bovidae],                                                                                                                                                                                                                                                                                                                                                                                                                                                              | Decoction | N | N |  |



---

|                 |                                                                                                                                                                                                                                                                                                                                                                                                                                                                                                     |                                                                                                                                                                                                                                                                                                                                                                                                                                                                                                                                                                                                                                                      |
|-----------------|-----------------------------------------------------------------------------------------------------------------------------------------------------------------------------------------------------------------------------------------------------------------------------------------------------------------------------------------------------------------------------------------------------------------------------------------------------------------------------------------------------|------------------------------------------------------------------------------------------------------------------------------------------------------------------------------------------------------------------------------------------------------------------------------------------------------------------------------------------------------------------------------------------------------------------------------------------------------------------------------------------------------------------------------------------------------------------------------------------------------------------------------------------------------|
| Researcher<br>s | <i>recens</i> , <i>Moutan</i><br><i>radicis cortex</i> ,<br><i>Paeoniae radix</i><br><i>rubra</i> , <i>Smilax</i><br><i>glabrae rhizoma</i> ,<br><i>Sophorae radix</i> ,<br><i>Dictamni radicis</i><br><i>cortex</i> , <i>Kochiae</i><br><i>fructus</i> ,<br><i>Lithospermi</i><br><i>radix</i> , <i>Cicadidae</i><br><i>periostracum</i> ,<br><i>Scutellariae radix</i> ,<br><i>Saposhnikoviae</i><br><i>radix</i> , <i>Imperatae</i><br><i>rhizoma</i> ,<br><i>Atractylodis</i><br><i>rhizoma</i> | <i>Rehmannia glutinosa</i><br>(Gaertn.) DC.<br>[Orobanchaceae]( <i>Rehmanniae Radix</i><br>Recens), <i>Paeonia</i> ×<br><i>suffruticosa</i> Andrews<br>[Paeoniaceae],<br><i>Paeonia anomala</i><br>subsp. <i>veitchii</i><br>(Lynch) D.Y.Hong &<br>K.Y.Pan<br>[Paeoniaceae] ,<br><i>Smilax glabra</i> Roxb.<br>[Smilacaceae],<br><i>Sophora flavescens</i><br>Aiton [Fabaceae],<br><i>Dictamnus</i><br><i>dasycarpus</i> Turcz.<br>[Rutaceae], <i>Bassia</i><br><i>scoparia</i> (L.) A.J.Scott<br>[Amaranthaceae],<br><i>Arnebia euchroma</i><br>(Royle ex Benth.)<br>I.M.Johnst.<br>[Boraginaceae],<br><i>Cryptotympana</i><br><i>dubia</i> (Haupt) |
|-----------------|-----------------------------------------------------------------------------------------------------------------------------------------------------------------------------------------------------------------------------------------------------------------------------------------------------------------------------------------------------------------------------------------------------------------------------------------------------------------------------------------------------|------------------------------------------------------------------------------------------------------------------------------------------------------------------------------------------------------------------------------------------------------------------------------------------------------------------------------------------------------------------------------------------------------------------------------------------------------------------------------------------------------------------------------------------------------------------------------------------------------------------------------------------------------|

|                 |                    |                                   |                                                                                                                                                                                                                                                                                                                                          |                                                                                                                                                                                                                                                                                  |         |   |   |
|-----------------|--------------------|-----------------------------------|------------------------------------------------------------------------------------------------------------------------------------------------------------------------------------------------------------------------------------------------------------------------------------------------------------------------------------------|----------------------------------------------------------------------------------------------------------------------------------------------------------------------------------------------------------------------------------------------------------------------------------|---------|---|---|
|                 |                    |                                   |                                                                                                                                                                                                                                                                                                                                          | [Cicadidae],<br>Scutellaria baicalensis<br>Georgi [Lamiaceae],<br>Saposhnikovia<br>divaricata (Turcz. ex<br>Ledeb.) Schischk.<br>[Apiaceae], Imperata<br>cylindrica (L.)<br>Raeusch. [Poaceae],<br>Atractylodes lancea<br>(Thunb.) DC.<br>[Asteraceae](Atractyl<br>odis Rhizoma) |         |   |   |
| Jiang<br>(2012) | Sendi<br>particles | Prepared<br>by<br>Researcher<br>s | <i>Rehmanniae radix</i><br><i>recens,</i><br><i>Scrophulariae</i><br><i>radix, Moutan</i><br><i>radicis cortex,</i><br><i>Paeoniae radix</i><br><i>rubra,</i><br><i>Chrysanthmi flos,</i><br><i>Taraxaci herba,</i><br><i>Isatidis radix,</i><br><i>Violae herba,</i><br><i>Gardenia</i><br><i>jasminoides,</i><br><i>Smilax glabrae</i> | Rehmannia glutinosa<br>(Gaertn.) DC.<br>[Orobanchaceae](Reh<br>manniae Radix<br>Recens), Scrophularia<br>ningpoensis Hemsl.<br>[Scrophulariaceae],<br>Paeonia × suffruticosa<br>Andrews<br>[Paeoniaceae],<br>Paeonia anomala<br>subsp. veitchii<br>(Lynch) D.Y.Hong &<br>K.Y.Pan | Granule | N | N |

---

|                         |                         |
|-------------------------|-------------------------|
| <i>rhizoma,</i>         | [Paeoniaceae],          |
| <i>Fritillariae</i>     | Chrysanthemum ×         |
| <i>thunbergii</i>       | morifolium (Ramat.)     |
| <i>bulbus,</i>          | Hemsl. [Asteraceae],    |
| <i>Trichosanthes</i>    | Taraxacum               |
| <i>kirilowii,</i>       | mongolicum Hand.-       |
| <i>Platycodonis</i>     | Mazz. [Asteraceae],     |
| <i>radix,</i>           | Isatis tinctoria subsp. |
| <i>Glycyrrhizae</i>     | tinctoria               |
| <i>radix et rhizoma</i> | [Brassicaceae](Isatidis |
|                         | Radix), Viola           |
|                         | mandshurica             |
|                         | W.Becker [Violaceae],   |
|                         | Gardenia jasminoides    |
|                         | J.Ellis [Rubiaceae],    |
|                         | Smilax glabra Roxb.     |
|                         | [Smilacaceae],          |
|                         | Fritillaria thunbergii  |
|                         | Miq. [Liliaceae],       |
|                         | Trichosanthes           |
|                         | kirilowii Maxim.        |
|                         | [Cucurbitaceae],        |
|                         | Platycodon              |
|                         | grandiflorus (Jacq.)    |
|                         | A.DC.                   |
|                         | [Campanulaceae],        |
|                         | Glycyrrhiza uralensis   |

|               |                           |                                                                                 |                                                                                                                                                   |                                                                                                                                                                                                                                                                                                        |         |   |   |
|---------------|---------------------------|---------------------------------------------------------------------------------|---------------------------------------------------------------------------------------------------------------------------------------------------|--------------------------------------------------------------------------------------------------------------------------------------------------------------------------------------------------------------------------------------------------------------------------------------------------------|---------|---|---|
|               |                           |                                                                                 |                                                                                                                                                   | Fisch. ex DC.<br>[Fabaceae]                                                                                                                                                                                                                                                                            |         |   |   |
| Liu<br>(2012) | Runzaozhiya<br>ng capsule | Commercial supplier<br>Guizhou<br>Tongji<br>Tang<br>Pharmaceutical Co.,<br>Ltd. | <i>Polygoni<br/>multiflori radix,<br/>Rehmanniae radix<br/>recens, Mori<br/>folium, Sophorae<br/>radix, Girardiana<br/>heterophylla<br/>decne</i> | Reynoutria multiflora<br>(Thunb.) Moldenke<br>[Polygonaceae],<br>Rehmannia glutinosa<br>(Gaertn.) DC.<br>[Orobanchaceae](Reh<br>manniae Radix<br>Recens), Morus alba<br>L. [Moraceae],<br>Sophora flavescens<br>Aiton [Fabaceae],<br>Girardinia<br>diversifolia subsp.<br>diversifolia<br>[Urticaceae] | Capsule | N | N |
| Xie<br>(2012) | Runzaozhiya<br>ng capsule | Commercial supplier<br>Guizhou<br>Tongji<br>Tang<br>Pharmaceutical Co.,         | <i>Polygoni<br/>multiflori radix,<br/>Rehmanniae radix<br/>recens, Mori<br/>folium, Sophorae<br/>radix, Girardiana<br/>heterophylla</i>           | Reynoutria multiflora<br>(Thunb.) Moldenke<br>[Polygonaceae],<br>Rehmannia glutinosa<br>(Gaertn.) DC.<br>[Orobanchaceae](Reh<br>manniae Radix                                                                                                                                                          | Capsule | N | N |

|              |                 |                                                                |                                                                                                                                                                                                     |                                                                                                                                                                                                     |         |   |   |
|--------------|-----------------|----------------------------------------------------------------|-----------------------------------------------------------------------------------------------------------------------------------------------------------------------------------------------------|-----------------------------------------------------------------------------------------------------------------------------------------------------------------------------------------------------|---------|---|---|
|              |                 | Ltd.                                                           | <i>decne</i>                                                                                                                                                                                        | Recens), Morus alba L. [Moraceae], Sophora flavescens Aiton [Fabaceae], Girardinia diversifolia subsp. diversifolia [Urticaceae]                                                                    |         |   |   |
| Zhang (2012) | Yinxie capsule  | Commercial supplier Xinjiang Weiatang Pharmaceutical Co., Ltd. | <i>Smilax glabrae rhizoma, Smilacis chinae rhizoma</i>                                                                                                                                              | Smilax glabra Roxb. [Smilacaceae], Smilax china L. [Smilacaceae]                                                                                                                                    | Capsule | N | N |
| Zhou (2012a) | Xiaoyin granule | Commercial supplier Shaanxi Kanghui Pharmaceutical Co., Ltd.   | <i>Rehmanniae radix recens, Moutan radidis cortex, Paeoniae radix rubra, Angelicae sinensis radix, Sophorae radix, Lonicerae flos, Scrophulariae radix, Arctii fructus, Cicadidae periostracum,</i> | Rehmannia glutinosa (Gaertn.) DC. [Orobanchaceae](Rehmanniae Radix Recens), Paeonia × suffruticosa Andrews [Paeoniaceae], Paeonia anomala subsp. veitchii (Lynch) D.Y.Hong & K.Y.Pan [Paeoniaceae], | Granule | N | N |

---

|                         |                       |
|-------------------------|-----------------------|
| <i>Dictamni radidis</i> | Angelica sinensis     |
| <i>cortex, Isatidis</i> | (Oliv.) Diels         |
| <i>folium, Carthami</i> | [Apiaceae], Sophora   |
| <i>flos,</i>            | flavescens Aiton      |
| <i>Saposhnikoviae</i>   | [Fabaceae], Lonicera  |
| <i>radix</i>            | japonica Thunb.       |
|                         | [Caprifoliaceae],     |
|                         | Scrophularia          |
|                         | ningpoensis Hemsl.    |
|                         | [Scrophulariaceae],   |
|                         | Arctium lappa L.      |
|                         | [Asteraceae],         |
|                         | Cryptotympana         |
|                         | dubia (Haupt)         |
|                         | [Cicadidae],          |
|                         | Dictamnus             |
|                         | dasycarpus Turcz.     |
|                         | [Rutaceae], Isatis    |
|                         | tinctoria subsp.      |
|                         | tinctoria             |
|                         | [Brassicaceae],       |
|                         | Carthamus tinctorius  |
|                         | L. [Asteraceae],      |
|                         | Saposhnikovia         |
|                         | divaricata (Turcz. ex |
|                         | Ledeb.) Schischk.     |
|                         | [Apiaceae]            |

|                 |                    |                                                                                  |                                                                                                                                                                                                                                                                                                                                                                                                                                                             |                                                                                                                                                                                                                                                                                                                                                                                                                                                                                                                                            |         |   |   |
|-----------------|--------------------|----------------------------------------------------------------------------------|-------------------------------------------------------------------------------------------------------------------------------------------------------------------------------------------------------------------------------------------------------------------------------------------------------------------------------------------------------------------------------------------------------------------------------------------------------------|--------------------------------------------------------------------------------------------------------------------------------------------------------------------------------------------------------------------------------------------------------------------------------------------------------------------------------------------------------------------------------------------------------------------------------------------------------------------------------------------------------------------------------------------|---------|---|---|
| Zhou<br>(2012b) | Xiaoyin<br>granule | Commerci<br>al supplier<br>Shaanxi<br>Kanghui<br>Pharmaceu<br>tical Co.,<br>Ltd. | <i>Rehmanniae radix</i><br><i>recens, Moutan</i><br><i>radicis cortex,</i><br><i>Paeoniae radix</i><br><i>rubra, Angelicae</i><br><i>sinensis radix,</i><br><i>Sophorae radix,</i><br><i>Lonicerae flos,</i><br><i>Scrophulariae</i><br><i>radix, Arctii</i><br><i>fructus, Cicadidae</i><br><i>periostracum,</i><br><i>Dictamni radicis</i><br><i>cortex, Isatidis</i><br><i>folium, Carthami</i><br><i>flos,</i><br><i>Saposhnikoviae</i><br><i>radix</i> | Rehmannia glutinosa<br>(Gaertn.) DC.<br>[Orobanchaceae](Reh<br>manniae Radix<br>Recens), Paeonia ×<br>suffruticosa Andrews<br>[Paeoniaceae],<br>Paeonia anomala<br>subsp. veitchii<br>(Lynch) D.Y.Hong &<br>K.Y.Pan<br>[Paeoniaceae],<br>Angelica sinensis<br>(Oliv.) Diels<br>[Apiaceae], Sophora<br>flavescens Aiton<br>[Fabaceae], Lonicera<br>japonica Thunb.<br>[Caprifoliaceae],<br>Scrophularia<br>ningpoensis Hemsl.<br>[Scrophulariaceae],<br>Arctium lappa L.<br>[Asteraceae],<br>Cryptotympana<br>dubia (Haupt)<br>[Cicadidae], | Granule | N | N |
|-----------------|--------------------|----------------------------------------------------------------------------------|-------------------------------------------------------------------------------------------------------------------------------------------------------------------------------------------------------------------------------------------------------------------------------------------------------------------------------------------------------------------------------------------------------------------------------------------------------------|--------------------------------------------------------------------------------------------------------------------------------------------------------------------------------------------------------------------------------------------------------------------------------------------------------------------------------------------------------------------------------------------------------------------------------------------------------------------------------------------------------------------------------------------|---------|---|---|

|                |                      |                                   |                                                                                                                                                                                                                                                                                                                      |                                                                                                                                                                                                                                                                                                         |           |   |  |  |   |
|----------------|----------------------|-----------------------------------|----------------------------------------------------------------------------------------------------------------------------------------------------------------------------------------------------------------------------------------------------------------------------------------------------------------------|---------------------------------------------------------------------------------------------------------------------------------------------------------------------------------------------------------------------------------------------------------------------------------------------------------|-----------|---|--|--|---|
|                |                      |                                   |                                                                                                                                                                                                                                                                                                                      | <p>Dictamnus<br/>dasycarpus Turcz.<br/>[Rutaceae], Isatis<br/>tinctoria subsp.<br/>tinctoria<br/>[Brassicaceae],<br/>Carthamus tinctorius<br/>L. [Asteraceae],<br/>Saposhnikovia<br/>divaricata (Turcz. ex<br/>Ledeb.) Schischk.<br/>[Apiaceae]</p>                                                     |           |   |  |  |   |
| Chen<br>(2013) | Xiaoyin<br>decoction | Prepared<br>by<br>Researcher<br>s | <p><i>Paeoniae radix<br/>rubra,</i><br/><i>Rehmanniae radix<br/>recens, Smilax<br/>glabrae rhizoma,</i><br/><i>Lonicerae flos,</i><br/><i>Dictamni radices</i><br/><i>cortex, Angelicae<br/>sinensis radix,</i><br/><i>Cnidii rhizoma,</i><br/><i>Lithospermi<br/>radix, Salviae<br/>miltiorrhizae<br/>radix</i></p> | <p>Paeonia anomala<br/>subsp. veitchii<br/>(Lynch) D.Y.Hong &amp;<br/>K.Y.Pan<br/>[Paeoniaceae],<br/>Rehmannia glutinosa<br/>(Gaertn.) DC.<br/>[Orobanchaceae](Reh<br/>manniae Radix<br/>Recens), Smilax<br/>glabra Roxb.<br/>[Smilacaceae],<br/>Lonicera japonica<br/>Thunb.<br/>[Caprifoliaceae],</p> | Decoction | N |  |  | N |



|                |                          |                                   |                                                                                                                                                                                                                                                                                                                                     |                                                                                                                                                                                                                                                                                     |           |   |   |
|----------------|--------------------------|-----------------------------------|-------------------------------------------------------------------------------------------------------------------------------------------------------------------------------------------------------------------------------------------------------------------------------------------------------------------------------------|-------------------------------------------------------------------------------------------------------------------------------------------------------------------------------------------------------------------------------------------------------------------------------------|-----------|---|---|
|                |                          |                                   |                                                                                                                                                                                                                                                                                                                                     | Dictamnus<br>dasycarpus Turcz.<br>[Rutaceae], Angelica<br>sinensis (Oliv.) Diels<br>[Apiaceae],<br>Conioselinum<br>anthriscoides<br>‘Chuanxiong’<br>[Apiaceae], Arnebia<br>euchroma (Royle ex<br>Benth.) I.M.Johnst.<br>[Boraginaceae], Salvia<br>miltiorrhiza Bunge<br>[Lamiaceae] |           |   |   |
| Ding<br>(2013) | NiupixuanII<br>decoction | Prepared<br>by<br>Researcher<br>s | <i>Lonicerae flos,</i><br><i>Isatidis radix,</i><br><i>Lithospermi</i><br><i>radix, Imperatae</i><br><i>rhizoma,</i><br><i>Rehmanniae radix</i><br><i>recens, Rubiae</i><br><i>radix, Moutan</i><br><i>radicis cortex,</i><br><i>Trichosanthes</i><br><i>kirilowii, Smilax</i><br><i>glabrae rhizoma,</i><br><i>Persicae semen,</i> | Lonicera japonica<br>Thunb.<br>[Caprifoliaceae],<br>Isatis tinctoria subsp.<br>tinctoria<br>[Brassicaceae](Isatidis<br>Radix), Arnebia<br>euchroma (Royle ex<br>Benth.) I.M.Johnst.<br>[Boraginaceae],<br>Imperata cylindrica<br>(L.) Raeusch.<br>[Poaceae],                        | Decoction | N | N |

---

|                         |                       |
|-------------------------|-----------------------|
| <i>Carthami flos,</i>   | Rehmannia glutinosa   |
| <i>Mume fructus,</i>    | (Gaertn.) DC.         |
| <i>Dictamni radices</i> | [Orobanchaceae](Reh   |
| <i>cortex,</i>          | manniae Radix         |
| <i>Glycyrrhizae</i>     | Recens), Rubia        |
| <i>radix et rhizoma</i> | tinctorum L.          |
|                         | [Rubiaceae], Paeonia  |
|                         | × suffruticosa        |
|                         | Andrews               |
|                         | [Paeoniaceae],        |
|                         | Trichosanthes         |
|                         | kirilowii Maxim.      |
|                         | [Cucurbitaceae],      |
|                         | Smilax glabra Roxb.   |
|                         | [Smilacaceae], Prunus |
|                         | persica (L.) Batsch   |
|                         | [Rosaceae],           |
|                         | Carthamus tinctorius  |
|                         | L. [Asteraceae],      |
|                         | Prunus mume           |
|                         | (Siebold) Siebold &   |
|                         | Zucc. [Rosaceae],     |
|                         | Dictamnus             |
|                         | dasycarpus Turcz.     |
|                         | [Rutaceae],           |
|                         | Glycyrrhiza uralensis |
|                         | Fisch. ex DC.         |

|                |                                                    |                                                                                  |                                                                                                                                                                                                                                                                                                                |                                                                                                                                                                                                                                                                                                    |         |   |  |   |
|----------------|----------------------------------------------------|----------------------------------------------------------------------------------|----------------------------------------------------------------------------------------------------------------------------------------------------------------------------------------------------------------------------------------------------------------------------------------------------------------|----------------------------------------------------------------------------------------------------------------------------------------------------------------------------------------------------------------------------------------------------------------------------------------------------|---------|---|--|---|
| [Fabaceae]     |                                                    |                                                                                  |                                                                                                                                                                                                                                                                                                                |                                                                                                                                                                                                                                                                                                    |         |   |  |   |
| Mo<br>(2013)   | Total<br>Glycosides of<br>Paeoniae<br>Alba capsule | Commerci<br>al supplier<br>Ningbo<br>Lihua<br>Pharmaceu<br>tical Co.,<br>Ltd.    | <i>Paeonia lactiflora</i>                                                                                                                                                                                                                                                                                      | Paeonia lactiflora<br>Pall.<br>[Paeoniaceae](Paeoni<br>a lactiflora Alba)                                                                                                                                                                                                                          | Capsule | N |  | N |
| Song<br>(2013) | Xiaoyin<br>granule                                 | Commerci<br>al supplier<br>Shaanxi<br>Kanghui<br>Pharmaceu<br>tical Co.,<br>Ltd. | <i>Rehmanniae radix<br/>recens, Moutan<br/>radicis cortex,<br/>Paeoniae radix<br/>rubra, Angelicae<br/>sinensis radix,<br/>Sophorae radix,<br/>Lonicerae flos,<br/>Scrophulariae<br/>radix, Arctii<br/>fructus, Cicadidae<br/>periostracum,<br/>Dictamni radicis<br/>cortex, Isatidis<br/>folium, Carthami</i> | Rehmannia glutinosa<br>(Gaertn.) DC.<br>[Orobanchaceae](Reh<br>manniae Radix<br>Recens), Paeonia ×<br>suffruticosa Andrews<br>[Paeoniaceae],<br>Paeonia anomala<br>subsp. veitchii<br>(Lynch) D.Y.Hong &<br>K.Y.Pan<br>[Paeoniaceae],<br>Angelica sinensis<br>(Oliv.) Diels<br>[Apiaceae], Sophora | Granule | N |  | N |

---

|                       |                       |
|-----------------------|-----------------------|
| <i>flos,</i>          | flavescens Aiton      |
| <i>Saposhnikoviae</i> | [Fabaceae], Lonicera  |
| <i>radix</i>          | japonica Thunb.       |
|                       | [Caprifoliaceae],     |
|                       | Scrophularia          |
|                       | ningpoensis Hemsl.    |
|                       | [Scrophulariaceae],   |
|                       | Arctium lappa L.      |
|                       | [Asteraceae],         |
|                       | Cryptotympana         |
|                       | dubia (Haupt)         |
|                       | [Cicadidae],          |
|                       | Dictamnus             |
|                       | dasycarpus Turcz.     |
|                       | [Rutaceae], Isatis    |
|                       | tinctoria subsp.      |
|                       | tinctoria             |
|                       | [Brassicaceae],       |
|                       | Carthamus tinctorius  |
|                       | L. [Asteraceae],      |
|                       | Saposhnikovia         |
|                       | divaricata (Turcz. ex |
|                       | Ledeb.) Schischk.     |
|                       | [Apiaceae]            |

|              |                 |                                                                     |                                                                                                                                                                                                                                                                                 |                                                                                                                                                                                                                                                                                                                                                                                                                                                                |         |   |   |
|--------------|-----------------|---------------------------------------------------------------------|---------------------------------------------------------------------------------------------------------------------------------------------------------------------------------------------------------------------------------------------------------------------------------|----------------------------------------------------------------------------------------------------------------------------------------------------------------------------------------------------------------------------------------------------------------------------------------------------------------------------------------------------------------------------------------------------------------------------------------------------------------|---------|---|---|
| Zhang (2013) | Xiaoyin capsule | Commercial supplier Shaanxi Shaanxi Mormid Pharmaceutical Co., Ltd. | <i>Rehmanniae radix recens, Moutan radice cortex, Paeoniae radix rubra, Angelicae sinensis radix, Sophorae radix, Lonicerae flos, Scrophulariae radix, Arctii fructus, Cicadidae periostracum, Dictamni radice cortex, Isatidis folium, Carthami flos, Saposhnikoviae radix</i> | Rehmannia glutinosa (Gaertn.) DC.<br>[Orobanchaceae](Rehmanniae Radix Recens), Paeonia × suffruticosa Andrews [Paeoniaceae], Paeonia anomala subsp. veitchii (Lynch) D.Y.Hong & K.Y.Pan [Paeoniaceae], Angelica sinensis (Oliv.) Diels [Apiaceae], Sophora flavescens Aiton [Fabaceae], Lonicera japonica Thunb. [Caprifoliaceae], Scrophularia ningpoensis Hemsl. [Scrophulariaceae], Arctium lappa L. [Asteraceae], Cryptotympana dubia (Haupt) [Cicadidae], | Capsule | N | N |
|--------------|-----------------|---------------------------------------------------------------------|---------------------------------------------------------------------------------------------------------------------------------------------------------------------------------------------------------------------------------------------------------------------------------|----------------------------------------------------------------------------------------------------------------------------------------------------------------------------------------------------------------------------------------------------------------------------------------------------------------------------------------------------------------------------------------------------------------------------------------------------------------|---------|---|---|

|                 |                     |                                   |                                                                                                                                                                                                                                                                                                  |                                                                                                                                                                                                                                                                                          |           |   |   |
|-----------------|---------------------|-----------------------------------|--------------------------------------------------------------------------------------------------------------------------------------------------------------------------------------------------------------------------------------------------------------------------------------------------|------------------------------------------------------------------------------------------------------------------------------------------------------------------------------------------------------------------------------------------------------------------------------------------|-----------|---|---|
|                 |                     |                                   |                                                                                                                                                                                                                                                                                                  | Dictamnus<br>dasycarpus Turcz.<br>[Rutaceae], Isatis<br>tinctoria subsp.<br>tinctoria<br>[Brassicaceae],<br>Carthamus tinctorius<br>L. [Asteraceae],<br>Saposhnikovia<br>divaricata (Turcz. ex<br>Ledeb.) Schischk.<br>[Apiaceae]                                                        |           |   |   |
| Cheng<br>(2014) | Yanghe<br>decoction | Prepared<br>by<br>Researcher<br>s | <i>Rehmanniae radix<br/>         preparata, Cervi<br/>         cornus colla,<br/>         Zingiberis<br/>         rhizoma,<br/>         Cinnamomi<br/>         cortex, Ephedrae<br/>         herba, Sinapis<br/>         alba semen,<br/>         Glycyrrhizae<br/>         radix et rhizoma</i> | Rehmannia glutinosa<br>(Gaertn.) DC.<br>[Orobanchaceae](Reh<br>manniae Radix<br>Preparata), Cervi<br>Cornus Colla,<br>Zingiberis Rhizoma,<br>Cinnamomi Cortex,<br>Ephedra sinica Stapf<br>[Ephedraceae],<br>Sinapis alba L.<br>[Brassicaceae],<br>Glycyrrhiza uralensis<br>Fisch. ex DC. | Decoction | N | N |

[Fabaceae]

|              |                    |                                                                          |                                                                                                                                                                                                                                                                                                                          |                                                                                                                                                                                                                                                                                                                        |         |   |   |
|--------------|--------------------|--------------------------------------------------------------------------|--------------------------------------------------------------------------------------------------------------------------------------------------------------------------------------------------------------------------------------------------------------------------------------------------------------------------|------------------------------------------------------------------------------------------------------------------------------------------------------------------------------------------------------------------------------------------------------------------------------------------------------------------------|---------|---|---|
| Du<br>(2014) | Xiaoyin<br>granule | Commercial supplier<br>Shaanxi<br>Kanghui<br>Pharmaceutical Co.,<br>Ltd. | <i>Rehmanniae radix<br/>recens, Moutan<br/>radicis cortex,<br/>Paeoniae radix<br/>rubra, Angelicae<br/>sinensis radix,<br/>Sophorae fadix,<br/>Lonicerae flos,<br/>Scrophulariae<br/>radix, Arctii<br/>fructus, Cicadidae<br/>periostracum,<br/>Dictamni radicis<br/>cortex, Isatidis<br/>folium, Carthami<br/>flos,</i> | Rehmannia glutinosa<br>(Gaertn.) DC.<br>[Orobanchaceae](Reh<br>manniae Radix<br>Recens), Paeonia ×<br>suffruticosa Andrews<br>[Paeoniaceae],<br>Paeonia anomala<br>subsp. veitchii<br>(Lynch) D.Y.Hong &<br>K.Y.Pan<br>[Paeoniaceae],<br>Angelica sinensis<br>(Oliv.) Diels<br>[Apiaceae], Sophora<br>flavescens Aiton | Granule | N | N |
|--------------|--------------------|--------------------------------------------------------------------------|--------------------------------------------------------------------------------------------------------------------------------------------------------------------------------------------------------------------------------------------------------------------------------------------------------------------------|------------------------------------------------------------------------------------------------------------------------------------------------------------------------------------------------------------------------------------------------------------------------------------------------------------------------|---------|---|---|

|              |                              |                                   |                                                                                                              |                                                                                                                                                                                                                                                                                                                                                                                                                                                                                                                            |           |   |  |   |
|--------------|------------------------------|-----------------------------------|--------------------------------------------------------------------------------------------------------------|----------------------------------------------------------------------------------------------------------------------------------------------------------------------------------------------------------------------------------------------------------------------------------------------------------------------------------------------------------------------------------------------------------------------------------------------------------------------------------------------------------------------------|-----------|---|--|---|
|              |                              |                                   | <i>Saposhnikovia<br/>radix</i>                                                                               | [Fabaceae], <i>Lonicera<br/>japonica</i> Thunb.<br>[Caprifoliaceae],<br><i>Scrophularia<br/>ningpoensis</i> Hemsl.<br>[Scrophulariaceae],<br><i>Arctium lappa</i> L.<br>[Asteraceae],<br><i>Cryptotympana<br/>dubia</i> (Haupt)<br>[Cicadidae],<br><i>Dictamnus<br/>dasycarpus</i> Turcz.<br>[Rutaceae], <i>Isatis<br/>tinctoria</i> subsp.<br><i>tinctoria</i><br>[Brassicaceae],<br><i>Carthamus tinctorius</i><br>L. [Asteraceae],<br><i>Saposhnikovia<br/>divaricata</i> (Turcz. ex<br>Ledeb.) Schischk.<br>[Apiaceae] |           |   |  |   |
| Li<br>(2014) | Huanglianjie<br>du decoction | Prepared<br>by<br>Researcher<br>s | <i>Coptis chinensis</i> ,<br><i>Scutellariae radix</i> ,<br><i>Phellodendri<br/>cortex</i> , <i>Gardenia</i> | <i>Coptis chinensis</i><br>Franch.<br>[Ranunculaceae],<br><i>Scutellaria baicalensis</i>                                                                                                                                                                                                                                                                                                                                                                                                                                   | Decoction | N |  | N |



|                 |                         |                                   |                                                                                                                                                                                                                                                                          |                                                                                                                                                                                                                                                                                                                                      |           |   |   |
|-----------------|-------------------------|-----------------------------------|--------------------------------------------------------------------------------------------------------------------------------------------------------------------------------------------------------------------------------------------------------------------------|--------------------------------------------------------------------------------------------------------------------------------------------------------------------------------------------------------------------------------------------------------------------------------------------------------------------------------------|-----------|---|---|
|                 |                         |                                   | <i>jasminoides</i> ,<br><i>Smilax glabrae</i><br><i>rhizoma</i> ,<br><i>Hedyotidis herba</i> ,<br><i>Ligustri fructus</i> ,<br><i>Ecliptae herba</i>                                                                                                                     | Georgi [Lamiaceae],<br>Phellodendron<br>chinense<br>C.K.Schneid.<br>[Rutaceae], Gardenia<br>jasminoides J.Ellis<br>[Rubiaceae], Smilax<br>glabra Roxb.<br>[Smilacaceae],<br>Scleromitron<br>diffusum (Willd.)<br>R.J.Wang<br>[Rubiaceae],<br>Ligustrum lucidum<br>W.T.Aiton [Oleaceae],<br>Eclipta prostrata (L.)<br>L. [Asteraceae] |           |   |   |
| Liang<br>(2014) | Qinzhuliangx<br>ue feng | Prepared<br>by<br>Researcher<br>s | <i>Scutellariae radix</i> ,<br><i>Ecliptae herba</i> ,<br><i>Margaritifera</i><br><i>concha</i> , <i>Paeoniae</i><br><i>radix rubra</i> ,<br><i>Rehmanniae radix</i><br><i>recens</i> ,<br><i>Lithospermi</i><br><i>radix</i> , <i>Moutan</i><br><i>radicis cortex</i> , | Scutellaria baicalensis<br>Georgi [Lamiaceae],<br>Eclipta prostrata (L.)<br>L. [Asteraceae],<br>Pinctada imbricata<br>Röding [Pteriidae],<br>Paeonia anomala<br>subsp. veitchii<br>(Lynch) D.Y.Hong &<br>K.Y.Pan                                                                                                                     | Decoction | N | N |

---

|                          |                        |
|--------------------------|------------------------|
| <i>Lonicerae flos,</i>   | [Paeoniaceae] ,        |
| <i>Cynanchi</i>          | Rehmannia glutinosa    |
| <i>paniculati radix</i>  | (Gaertn.) DC.          |
| <i>et rhizoma,</i>       | [Orobanchaceae](Reh    |
| <i>Glycyrrhizae</i>      | manniae Radix          |
| <i>radix et rhizoma,</i> | Recens) , Arnebia      |
| <i>Saposhnikoviae</i>    | euchroma (Royle ex     |
| <i>radix,</i>            | Benth.) I.M.Johnst.    |
| <i>Scrophulariae</i>     | [Boraginaceae],        |
| <i>radix</i>             | Paeonia × suffruticosa |
|                          | Andrews                |
|                          | [Paeoniaceae],         |
|                          | Lonicera japonica      |
|                          | Thunb.                 |
|                          | [Caprifoliaceae],      |
|                          | Vincetoxicum           |
|                          | mukdenense Kitag.      |
|                          | [Apocynaceae],         |
|                          | Glycyrrhiza uralensis  |
|                          | Fisch. ex DC.          |
|                          | [Fabaceae],            |
|                          | Saposhnikovia          |
|                          | divaricata (Turcz. ex  |
|                          | Ledeb.) Schischk.      |
|                          | [Apiaceae],            |
|                          | Scrophularia           |
|                          | ningpoensis Hemsl.     |

|               |                           |                                                                                 |                                                                                                                                                                                                             |                                                                                                                                                                                                                                                                                        |           |   |   |
|---------------|---------------------------|---------------------------------------------------------------------------------|-------------------------------------------------------------------------------------------------------------------------------------------------------------------------------------------------------------|----------------------------------------------------------------------------------------------------------------------------------------------------------------------------------------------------------------------------------------------------------------------------------------|-----------|---|---|
|               |                           |                                                                                 |                                                                                                                                                                                                             | [Scrophulariaceae]                                                                                                                                                                                                                                                                     |           |   |   |
| Liu<br>(2014) | Runzaozhiya<br>ng capsule | Commercial supplier<br>Guizhou<br>Tongji<br>Tang<br>Pharmaceutical Co.,<br>Ltd. | <i>Polygoni<br/>multiflori radix,<br/>Rehmanniae radix<br/>recens, Mori<br/>folium, Sophorae<br/>radix, Girardiana<br/>heterophylla<br/>decne</i>                                                           | Reynoutria multiflora<br>(Thunb.) Moldenke<br>[Polygonaceae],<br>Rehmannia glutinosa<br>(Gaertn.) DC.<br>[Orobanchaceae](Reh<br>manniae Radix<br>Recens), Morus alba<br>L. [Moraceae],<br>Sophora flavescens<br>Aiton [Fabaceae],<br>Girardinia<br>diversifolia subsp.<br>diversifolia | Capsule   | N | N |
|               |                           |                                                                                 |                                                                                                                                                                                                             | [Urticaceae]                                                                                                                                                                                                                                                                           |           |   |   |
| Qiu<br>(2014) | Yangxierunfu<br>yin       | Prepared<br>by<br>Researchers                                                   | <i>Rehmanniae radix<br/>recens,<br/>Rehmanniae radix<br/>preparata,<br/>Scrophulariae<br/>radix, Salviae<br/>miltiorrhizae<br/>radix, Polygoni<br/>Multiflori radix,<br/>Liriopsis seu<br/>ophiopogonis</i> | Rehmannia glutinosa<br>(Gaertn.) DC.<br>[Orobanchaceae](Reh<br>manniae Radix<br>Recens), Rehmannia<br>glutinosa (Gaertn.)<br>DC.<br>[Orobanchaceae](Reh<br>manniae Radix<br>Preparata),<br>Scrophularia                                                                                | Decoction | N | N |
|               |                           |                                                                                 |                                                                                                                                                                                                             |                                                                                                                                                                                                                                                                                        |           |   |   |

---

|                          |                        |
|--------------------------|------------------------|
| <i>tuber, Asparagi</i>   | ningpoensis Hemsl.     |
| <i>tuber, Cannabis</i>   | [Scrophulariaceae],    |
| <i>semen, Mori</i>       | Salvia miltiorrhiza    |
| <i>folium, Angelicae</i> | Bunge [Lamiaceae],     |
| <i>sinensis radix,</i>   | Reynoutria multiflora  |
| <i>Glycyrrhizae</i>      | (Thunb.) Moldenke      |
| <i>radix et rhizoma,</i> | [Polygonaceae],        |
| <i>Cicadidae</i>         | Ophiopogon             |
| <i>periostracum</i>      | japonicus (Thunb.)     |
|                          | Ker Gawl.              |
|                          | [Asparagaceae],        |
|                          | Asparagus              |
|                          | cochinchinensis        |
|                          | (Lour.) Merr.          |
|                          | [Asparagaceae],        |
|                          | Cannabis sativa L.     |
|                          | [Cannabaceae],         |
|                          | Morus alba L.          |
|                          | [Moraceae], Angelica   |
|                          | sinensis (Oliv.) Diels |
|                          | [Apiaceae],            |
|                          | Glycyrrhiza uralensis  |
|                          | Fisch. ex DC.          |
|                          | [Fabaceae],            |
|                          | Cryptotympana          |
|                          | dubia (Haupt)          |
|                          | [Cicadidae]            |

|               |                            |                                   |                                                                                                                                                                                                                                                                                                                                                                                                                                                                                                              |                                                                                                                                                                                                                                                                                                                                                                                                                                                                                                                        |           |   |   |
|---------------|----------------------------|-----------------------------------|--------------------------------------------------------------------------------------------------------------------------------------------------------------------------------------------------------------------------------------------------------------------------------------------------------------------------------------------------------------------------------------------------------------------------------------------------------------------------------------------------------------|------------------------------------------------------------------------------------------------------------------------------------------------------------------------------------------------------------------------------------------------------------------------------------------------------------------------------------------------------------------------------------------------------------------------------------------------------------------------------------------------------------------------|-----------|---|---|
| Qiu<br>(2014) | Duhuojishen<br>g decoction | Prepared<br>by<br>Researcher<br>s | <i>Loranthi ramulus</i>                                                                                                                                                                                                                                                                                                                                                                                                                                                                                      | Loranthus parasticus<br>Merr. [Loranthaceae],                                                                                                                                                                                                                                                                                                                                                                                                                                                                          | Decoction | N | N |
|               |                            |                                   | <i>et folium,</i><br><i>Angelica</i><br><i>pubescens,</i><br><i>Angelicae</i><br><i>sinensis radix,</i><br><i>Gentianae</i><br><i>macrophyllae</i><br><i>radix,</i><br><i>Cinnamomi</i><br><i>ramulus,</i><br><i>Saposhnikoviae</i><br><i>radix, Cnidii</i><br><i>rhizoma, Paeoniae</i><br><i>radix rubra,</i><br><i>Smilax glabrae</i><br><i>rhizoma,</i><br><i>Spatholobi caulis,</i><br><i>Clematidis radix,</i><br><i>Achyranthis</i><br><i>radix,</i><br><i>Glycyrrhizae</i><br><i>radix et rhizoma</i> | Angelica biserrata<br>(R.H.Shan &<br>C.Q.Yuan) C.Q.Yuan<br>& R.H.Shan<br>[Apiaceae], Angelica<br>sinensis (Oliv.) Diels<br>[Apiaceae], Gentiana<br>macrophylla Pall.<br>[Gentianaceae],<br>Neolitsea cassia (L.)<br>Kosterm. [Lauraceae],<br>Saposhnikovia<br>divaricata (Turcz. ex<br>Ledeb.) Schischk.<br>[Apiaceae],<br>Conioselinum<br>anthriscoides<br>'Chuanxiong'<br>[Apiaceae], Paeonia<br>anomala subsp.<br>veitchii (Lynch)<br>D.Y.Hong & K.Y.Pan<br>[Paeoniaceae], Smilax<br>glabra Roxb.<br>[Smilacaceae], |           |   |   |

|               |                                                               |                                   |                                                                                                                                                                                                                                                                                                               |                                                                                                                                                                                                                                                                                                         |           |   |   |
|---------------|---------------------------------------------------------------|-----------------------------------|---------------------------------------------------------------------------------------------------------------------------------------------------------------------------------------------------------------------------------------------------------------------------------------------------------------|---------------------------------------------------------------------------------------------------------------------------------------------------------------------------------------------------------------------------------------------------------------------------------------------------------|-----------|---|---|
|               |                                                               |                                   |                                                                                                                                                                                                                                                                                                               | Spatholobus<br>suberectus Dunn<br>[Fabaceae], Clematis<br>chinensis Osbeck<br>[Ranunculaceae],<br>Achyranthes<br>bidentata Blume<br>[Amaranthaceae],<br>Glycyrrhiza uralensis<br>Fisch. ex DC.<br>[Fabaceae]                                                                                            |           |   |   |
| Qiu<br>(2014) | Qingying<br>decoction<br>plus<br>Runzaoyingy<br>ang decoction | Prepared<br>by<br>Researcher<br>s | <i>Gypsum<br/>fibrosum,</i><br><i>Anemarrhenae<br/>rhizoma,</i><br><i>Scrophulariae<br/>radix,</i><br><i>Rehmanniae radix<br/>recens , Liriois<br/>seu ophiopogonis<br/>tuber, Coptis<br/>chinensis,</i><br><i>Phyllostachys<br/>nigra, Forsythiae<br/>fructus , Rulvis<br/>glycyrrhizae<br/>extractionis</i> | Gypsum Fibrosum,<br>Anemarrhena<br>asphodeloides Bunge<br>[Asparagaceae],<br>Scrophularia<br>ningpoensis Hemsl.<br>[Scrophulariaceae],<br>Rehmannia glutinosa<br>(Gaertn.) DC.<br>[Orobanchaceae](Reh<br>manniae Radix<br>Recens) ,<br>Ophiopogon<br>japonicus (Thunb.)<br>Ker Gawl.<br>[Asparagaceae], | Decoction | N | N |

|                  |                                     |                                                                           |                                                                                                                           |                                                                                                                                                                                                                                                                                     |           |   |   |
|------------------|-------------------------------------|---------------------------------------------------------------------------|---------------------------------------------------------------------------------------------------------------------------|-------------------------------------------------------------------------------------------------------------------------------------------------------------------------------------------------------------------------------------------------------------------------------------|-----------|---|---|
|                  |                                     |                                                                           | <i>sedilis,<br/>Glycyrrhizae<br/>radix et rhizoma</i>                                                                     | Coptis chinensis<br>Franch.<br>[Ranunculaceae],<br>Phyllostachys nigra<br>var. henonis<br>(Mitford) Rendle<br>[Poaceae], Forsythia<br>suspensa (Thunb.)<br>Vahl [Oleaceae],<br>Rulvis Glycyrrhizae<br>Extractionis Sedilis,<br>Glycyrrhiza uralensis<br>Fisch. ex DC.<br>[Fabaceae] |           |   |   |
| Zhang<br>(2014a) | Yinxie<br>capsule                   | Commercial supplier<br>Xinjiang<br>Viatang<br>Pharmaceutical Co.,<br>Ltd. | <i>Smilax glabrae<br/>rhizoma, Smilacis<br/>chinae rhizoma</i>                                                            | Smilax glabra Roxb.<br>[Smilacaceae], Smilax<br>china L.<br>[Smilacaceae]                                                                                                                                                                                                           | Capsule   | N | N |
| Zhang<br>(2014b) | Ziyinyangxue<br>qufeng<br>decoction | Prepared<br>by<br>Researchers                                             | <i>Angelicae<br/>sinensis radix,<br/>Paeonia lactiflora,<br/>Cnidii rhizoma,<br/>Rehmanniae radix<br/>recens, Tribuli</i> | Angelica sinensis<br>(Oliv.) Diels<br>[Apiaceae], Paeonia<br>lactiflora Pall.<br>[Paeoniaceae](Paeonia<br>lactiflora Alba),                                                                                                                                                         | Decoction | N | N |

---

|                          |                       |
|--------------------------|-----------------------|
| <i>fructus,</i>          | Conioselinum          |
| <i>Saposhnikoviae</i>    | anthriscoides         |
| <i>radix,</i>            | ‘Chuanxiong’          |
| <i>Schizonepetae</i>     | [Apiaceae],           |
| <i>spica, Polygoni</i>   | Rehmannia glutinosa   |
| <i>multiflori radix,</i> | (Gaertn.) DC.         |
| <i>Astragali radix,</i>  | [Orobanchaceae](Reh   |
| <i>Glycyrrhizae</i>      | manniae Radix         |
| <i>radix et rhizoma,</i> | Recens), Tribulus     |
| <i>Scolopendra,</i>      | terrestris L.         |
| <i>tripterygium</i>      | [Zygophyllaceae],     |
| <i>wilfordii</i>         | Saposhnikovia         |
|                          | divaricata (Turcz. ex |
|                          | Ledeb.) Schischk.     |
|                          | [Apiaceae], Nepeta    |
|                          | tenuifolia Benth.     |
|                          | [Lamiaceae],          |
|                          | Reynoutria multiflora |
|                          | (Thunb.) Moldenke     |
|                          | [Polygonaceae],       |
|                          | Astragalus            |
|                          | mongholicus Bunge     |
|                          | [Fabaceae],           |
|                          | Glycyrrhiza uralensis |
|                          | Fisch. ex DC.         |
|                          | [Fabaceae],           |
|                          | Scolopendra           |





|               |              |                                   |                                                                                                                                     |                                                                                                                                                                                                                                                                                                                                                                                                              |           |   |   |
|---------------|--------------|-----------------------------------|-------------------------------------------------------------------------------------------------------------------------------------|--------------------------------------------------------------------------------------------------------------------------------------------------------------------------------------------------------------------------------------------------------------------------------------------------------------------------------------------------------------------------------------------------------------|-----------|---|---|
|               |              |                                   |                                                                                                                                     | suberectus Dunn<br>[Fabaceae], Smilax<br>glabra Roxb.<br>[Smilacaceae],<br>Arnebia euchroma<br>(Royle ex Benth.)<br>I.M.Johnst.<br>[Boraginaceae],<br>Lonicera japonica<br>Thunb.<br>[Caprifoliaceae],<br>Scutellaria barbata<br>D.Don [Lamiaceae],<br>Scleromitron<br>diffusum (Willd.)<br>R.J.Wang<br>[Rubiaceae], Zaocys<br>dhumnades Cantor<br>[Colubridae], Salvia<br>miltiorrhiza Bunge<br>[Lamiaceae] |           |   |   |
| Cai<br>(2015) | Xiaoyin feng | Prepared<br>by<br>Researcher<br>s | <i>Salviae</i><br><i>miltiorrhizae</i><br><i>radix,</i><br><i>Scrophulariae</i><br><i>radix, Sophorae</i><br><i>radix, Isatidis</i> | Salvia miltiorrhiza<br>Bunge [Lamiaceae],<br>Scrophularia<br>ningpoensis Hemsl.<br>[Scrophulariaceae],<br>Sophora flavescens                                                                                                                                                                                                                                                                                 | Decoction | N | N |

---

|                          |                         |
|--------------------------|-------------------------|
| <i>folium, Paeoniae</i>  | Aiton [Fabaceae],       |
| <i>radix rubra,</i>      | Isatis tinctoria subsp. |
| <i>Lithospermi</i>       | tinctoria               |
| <i>radix, Moutan</i>     | [Brassicaceae],         |
| <i>radicis cortex,</i>   | Paeonia anomala         |
| <i>Violae herba,</i>     | subsp. veitchii         |
| <i>Taraxaci herba,</i>   | (Lynch) D.Y.Hong &      |
| <i>Paris polyphylla,</i> | K.Y.Pan                 |
| <i>Gardenia</i>          | [Paeoniaceae],          |
| <i>jasminoides,</i>      | Arnebia euchroma        |
| <i>Forsythiae</i>        | (Royle ex Benth.)       |
| <i>fructus,</i>          | I.M.Johnst.             |
| <i>Gentianae scabrae</i> | [Boraginaceae],         |
| <i>radix et rhizoma,</i> | Paeonia × suffruticosa  |
| <i>Zaocys, Cicadidae</i> | Andrews                 |
| <i>periostracum,</i>     | [Paeoniaceae], Viola    |
| <i>Lonicerae folium</i>  | mandshurica             |
| <i>et caulis, Smilax</i> | W.Becker [Violaceae],   |
| <i>glabrae rhizoma,</i>  | Taraxacum               |
| <i>Dictamni radices</i>  | mongolicum Hand.-       |
| <i>cortex, Euphorbia</i> | Mazz. [Asteraceae],     |
| <i>humifusa,</i>         | Paris polyphylla,       |
| <i>Lonicerae flos,</i>   | Gardenia jasminoides    |
| <i>Persicae semen,</i>   | J.Ellis [Rubiaceae],    |
| <i>Carthami flos,</i>    | Forsythia suspensa      |
| <i>Glycyrrhizae</i>      | (Thunb.) Vahl           |
| <i>radix et rhizoma,</i> | [Oleaceae], Gentiana    |

---

*Chrysanthmi flos*    scabra Bunge  
[Gentianaceae],  
Zaocys dhumnades  
Cantor [Colubridae],  
Cryptotympana  
dubia (Haupt)  
[Cicadidae], Lonicera  
japonica Thunb.  
[Caprifoliaceae],  
Smilax glabra Roxb.  
[Smilacaceae],  
Dictamnus  
dasycarpus Turcz.  
[Rutaceae],  
Euphorbia hirta L.  
[Euphorbiaceae],  
Lonicera japonica  
Thunb.  
[Caprifoliaceae],  
Prunus persica (L.)  
Batsch [Rosaceae],  
Carthamus tinctorius  
L. [Asteraceae],  
Glycyrrhiza uralensis  
Fisch. ex DC.  
[Fabaceae],  
Chrysanthemum ×

|                |                     |                                                                       |                                                                                                                                                                                                                                                                                                                                                                                                                                                                                                            |                                                                                                                                                                                                                                                                                                                                                                                                                                                        |        |   |   |
|----------------|---------------------|-----------------------------------------------------------------------|------------------------------------------------------------------------------------------------------------------------------------------------------------------------------------------------------------------------------------------------------------------------------------------------------------------------------------------------------------------------------------------------------------------------------------------------------------------------------------------------------------|--------------------------------------------------------------------------------------------------------------------------------------------------------------------------------------------------------------------------------------------------------------------------------------------------------------------------------------------------------------------------------------------------------------------------------------------------------|--------|---|---|
|                |                     |                                                                       |                                                                                                                                                                                                                                                                                                                                                                                                                                                                                                            | morifolium (Ramat.)<br>Hemsl. [Asteraceae]                                                                                                                                                                                                                                                                                                                                                                                                             |        |   |   |
| Jin<br>(2015a) | Matrin tablet       | Commercial supplier<br>Guangdong Yishu<br>Pharmaceutical Co.,<br>LTD. | <i>Sophorae radix</i>                                                                                                                                                                                                                                                                                                                                                                                                                                                                                      | <i>Sophora flavescens</i><br>Aiton [Fabaceae]                                                                                                                                                                                                                                                                                                                                                                                                          | Tablet | N | N |
| Jin<br>(2015b) | Liangxueqing powder | Prepared by<br>Researchers                                            | <i>Sophorae radix</i> ,<br><i>Xanthii fructus</i> ,<br><i>Kochiae fructus</i> ,<br><i>Dictamni radices</i><br><i>cortex</i> , <i>Angelicae</i><br><i>sinensis radix</i> ,<br><i>Rehmanniae radix</i><br><i>recens</i> , <i>Paeoniae</i><br><i>radix rubra</i> ,<br><i>Paeonia lactiflora</i> ,<br><i>Zaocys</i> ,<br><i>Scolopendra</i> ,<br><i>Buthus martensii</i> ,<br><i>Cicadidae</i><br><i>periostracum</i> ,<br><i>Saposhnikoviae</i><br><i>radix</i> , <i>Gentianae</i><br><i>scabrae radix et</i> | <i>Sophora flavescens</i><br>Aiton [Fabaceae],<br><i>Xanthium</i><br><i>strumarium</i> L.<br>[Asteraceae], <i>Bassia</i><br><i>scoparia</i> (L.) A.J.Scott<br>[Amaranthaceae],<br><i>Dictamni Radicis</i> ,<br><i>Cortex</i><br><i>Angelica</i><br><i>sinensis</i> (Oliv.) Diels<br>[Apiaceae],<br><i>Rehmannia glutinosa</i><br>(Gaertn.) DC.<br>[Orobanchaceae]( <i>Rehmanniae Radix</i><br><i>Recens</i> ), <i>Paeonia</i><br><i>anomala</i> subsp. | Powder | N | N |

---

|                         |                       |
|-------------------------|-----------------------|
| <i>rhizoma, Thlaspi</i> | veitchii (Lynch)      |
| <i>arvense, Viola</i>   | D.Y.Hong & K.Y.Pan    |
| <i>herba, Salvia</i>    | [Paeoniaceae],        |
| <i>multiorrhizae</i>    | Paeonia lactiflora    |
| <i>radix, Citri</i>     | Pall.                 |
| <i>unshius</i>          | [Paeoniaceae](Paeoni  |
| <i>pericarpium,</i>     | a lactiflora Alba),   |
| <i>Bupleuri radix,</i>  | Zaocys dhumnades      |
| <i>Glycyrrhizae</i>     | Cantor [Colubridae],  |
| <i>radix et rhizoma</i> | Scolopendra           |
|                         | subspinipes mutilans  |
|                         | Linné Koch            |
|                         | [Scolopendridae],     |
|                         | Buthus martensii      |
|                         | Karsch [Buthidae],    |
|                         | Cryptotympana         |
|                         | dubia (Haupt)         |
|                         | [Cicadidae],          |
|                         | Saposhnikovia         |
|                         | divaricata (Turcz. ex |
|                         | Ledeb.) Schischk.     |
|                         | [Apiaceae], Gentiana  |
|                         | scabra Bunge          |
|                         | [Gentianaceae],       |
|                         | Thlaspi arvense L.    |
|                         | [Brassicaceae], Viola |
|                         | mandshurica           |

|               |                       |                                   |                                                                                                                                                                                                                                                                                                                                                   |                                                                                                                                                                                                                                                                                                                              |           |   |   |
|---------------|-----------------------|-----------------------------------|---------------------------------------------------------------------------------------------------------------------------------------------------------------------------------------------------------------------------------------------------------------------------------------------------------------------------------------------------|------------------------------------------------------------------------------------------------------------------------------------------------------------------------------------------------------------------------------------------------------------------------------------------------------------------------------|-----------|---|---|
|               |                       |                                   |                                                                                                                                                                                                                                                                                                                                                   | W.Becker [Violaceae],<br>Salvia miltiorrhiza<br>Bunge [Lamiaceae],<br>Citrus × aurantium f.<br>deliciosa (Ten.)<br>M.Hiroe [Rutaceae],<br>Bupleurum chinense<br>DC. [Apiaceae],<br>Glycyrrhiza uralensis<br>Fisch. ex DC.<br>[Fabaceae]                                                                                      |           |   |   |
| Lu<br>(2015a) | Qingying<br>decoction | Prepared<br>by<br>Researcher<br>s | <i>Bubalus bubalis</i> ,<br><i>Moutan radice</i><br><i>cortex, Forsythiae</i><br><i>fructus, Lonicerae</i><br><i>flos, Rehmanniae</i><br><i>radix recens</i> ,<br><i>Taraxaci herba</i> ,<br><i>Scrophulariae</i><br><i>radix, Spatholobi</i><br><i>caulis, Liriopis</i><br><i>seu ophiopogonis</i><br><i>tuber</i> ,<br><i>Lithospermi radix</i> | Bubalus bubalis<br>Linné [Bovidae],<br>Paeonia × suffruticosa<br>Andrews<br>[Paeoniaceae],<br>Forsythia suspensa<br>(Thunb.) Vahl<br>[Oleaceae], Lonicera<br>japonica Thunb.<br>[Caprifoliaceae],<br>Rehmannia glutinosa<br>(Gaertn.) DC.<br>[Orobanchaceae](Reh<br>manniae Radix<br>Recens), Taraxacum<br>mongolicum Hand.- | Decoction | N | N |

|               |                     |                                   |                                                                                                                                                                                                                         |                                                                                                                                                                                                                                                                                 |           |   |   |
|---------------|---------------------|-----------------------------------|-------------------------------------------------------------------------------------------------------------------------------------------------------------------------------------------------------------------------|---------------------------------------------------------------------------------------------------------------------------------------------------------------------------------------------------------------------------------------------------------------------------------|-----------|---|---|
|               |                     |                                   |                                                                                                                                                                                                                         | Mazz. [Asteraceae],<br>Scrophularia<br>ningpoensis Hemsl.<br>[Scrophulariaceae],<br>Spatholobus<br>suberectus Dunn<br>[Fabaceae],<br>Ophiopogon<br>japonicus (Thunb.)<br>Ker Gawl.<br>[Asparagaceae],<br>Arnebia euchroma<br>(Royle ex Benth.)<br>I.M.Johnst.<br>[Boraginaceae] |           |   |   |
| Lu<br>(2015b) | Yangxierunfu<br>yin | Prepared<br>by<br>Researcher<br>s | <i>Rehmanniae radix<br/>recens,<br/>Rehmanniae radix<br/>Preparata,<br/>Angelicae<br/>sinensis radix,<br/>Paeoniae radix<br/>rubra, Asparagi<br/>tuber, Liriopsis seu<br/>ophiopogonis<br/>tuber,<br/>Trichosanthes</i> | Rehmannia glutinosa<br>(Gaertn.) DC.<br>[Orobanchaceae](Reh<br>manniae Radix<br>Recens), Rehmannia<br>glutinosa (Gaertn.)<br>DC.<br>[Orobanchaceae](Reh<br>manniae Radix<br>Preparata), Angelica<br>sinensis (Oliv.) Diels<br>[Apiaceae], Paeonia                               | Decoction | N | N |



---

|                            |                        |
|----------------------------|------------------------|
| <i>kirilowii</i> , Moutan  | anomala subsp.         |
| <i>radicis cortex</i> ,    | veitchii (Lynch)       |
| <i>Astragali radix</i> ,   | D.Y.Hong & K.Y.Pan     |
| <i>Buthus</i>              | [Paeoniaceae],         |
| <i>martensii</i> ,         | Asparagus              |
| <i>Spatholobi caulis</i> , | cochinchinensis        |
| <i>Zaocys</i> ,            | (Lour.) Merr.          |
| <i>Batryticatus</i>        | [Asparagaceae],        |
| <i>bombyx</i>              | Ophiopogon             |
|                            | japonicus (Thunb.)     |
|                            | Ker Gawl.              |
|                            | [Asparagaceae],        |
|                            | Trichosanthes          |
|                            | kirilowii Maxim.       |
|                            | [Cucurbitaceae],       |
|                            | Paeonia × suffruticosa |
|                            | Andrews                |
|                            | [Paeoniaceae],         |
|                            | Astragalus             |
|                            | mongholicus Bunge      |
|                            | [Fabaceae], Buthus     |
|                            | martensii Karsch       |
|                            | [Buthidae] ,           |
|                            | Spatholobus            |
|                            | suberectus Dunn        |
|                            | [Fabaceae], Zaocys     |
|                            | dhumnades Cantor       |

|              |                         |                            |                                                                                                                                                                                    |                                                                                                                                                                                                                                                                                                                                                                                                                    |           |   |   |
|--------------|-------------------------|----------------------------|------------------------------------------------------------------------------------------------------------------------------------------------------------------------------------|--------------------------------------------------------------------------------------------------------------------------------------------------------------------------------------------------------------------------------------------------------------------------------------------------------------------------------------------------------------------------------------------------------------------|-----------|---|---|
|              |                         |                            |                                                                                                                                                                                    | [Colubridae],<br>Bombyx mori Linné<br>[Bombycidae]                                                                                                                                                                                                                                                                                                                                                                 |           |   |   |
| Ma<br>(2015) | Liangxuerunfu decoction | Prepared by<br>Researchers | <i>Rehmanniae radix recens, Isatidis folium, Smilax glabrae rhizoma, Imperatae rhizoma, Sophorae flos, Moutan radice cortex, Solani nigri herba, Glycyrrhizae radix et rhizoma</i> | Rehmannia glutinosa (Gaertn.) DC.<br>[Orobanchaceae](Rehmanniae Radix Recens), Isatis tinctoria subsp. tinctoria<br>[Brassicaceae], Smilax glabra Roxb.<br>[Smilacaceae], Imperata cylindrica (L.) Raeusch.<br>[Poaceae], Styphnolobium japonicum (L.) Schott<br>[Fabaceae], Paeonia × suffruticosa Andrews<br>[Paeoniaceae], Solanum nigrum L.<br>[Solanaceae], Glycyrrhiza uralensis Fisch. ex DC.<br>[Fabaceae] | Decoction | N | N |
| Peng         | Yinxiping pill          | Prepared                   | <i>Rehmanniae radix</i>                                                                                                                                                            | Rehmannia glutinosa                                                                                                                                                                                                                                                                                                                                                                                                | Pill      | N | N |

|        |                       |                                                                                                                                                                                                                                                                                                                                                                                                                                                                                                                                              |                                                                                                                                                                                                                                                                                                                                                                                                                                                                                                                                       |
|--------|-----------------------|----------------------------------------------------------------------------------------------------------------------------------------------------------------------------------------------------------------------------------------------------------------------------------------------------------------------------------------------------------------------------------------------------------------------------------------------------------------------------------------------------------------------------------------------|---------------------------------------------------------------------------------------------------------------------------------------------------------------------------------------------------------------------------------------------------------------------------------------------------------------------------------------------------------------------------------------------------------------------------------------------------------------------------------------------------------------------------------------|
| (2015) | by<br>Researcher<br>s | <i>recens,</i><br><i>Hedyotidis herba,</i><br><i>Scutellariae</i><br><i>barbatae herba,</i><br><i>Isatidis folium,</i><br><i>Paeoniae radix</i><br><i>rubra , Moutan</i><br><i>radicis cortex,</i><br><i>Salviae</i><br><i>miltiorrhizae</i><br><i>radix,</i><br><i>Lithospermi adix,</i><br><i>Ligustri fructus,</i><br><i>Ecliptae herba,</i><br><i>Liriopsis seu</i><br><i>ophiopogonis</i><br><i>tuber, Dioscoreae</i><br><i>rhizoma,</i><br><i>Dictamni radicis</i><br><i>cortex,</i><br><i>Glycyrrhizae</i><br><i>radix et rhizoma</i> | (Gaertn.) DC.<br>[Orobanchaceae](Reh<br>manniae Radix<br>Recens),<br>Scleromitron<br>diffusum (Willd.)<br>R.J.Wang<br>[Rubiaceae],<br>Scutellaria barbata<br>D.Don [Lamiaceae],<br>Isatis tinctoria subsp.<br>tinctoria<br>[Brassicaceae],<br>Paeonia anomala<br>subsp. veitchii<br>(Lynch) D.Y.Hong &<br>K.Y.Pan<br>[Paeoniaceae] ,<br>Paeonia × suffruticosa<br>Andrews<br>[Paeoniaceae], Salvia<br>miltiorrhiza Bunge<br>[Lamiaceae], Arnebia<br>euchroma (Royle ex<br>Benth.) I.M.Johnst.<br>[Boraginaceae],<br>Ligustrum lucidum |
|--------|-----------------------|----------------------------------------------------------------------------------------------------------------------------------------------------------------------------------------------------------------------------------------------------------------------------------------------------------------------------------------------------------------------------------------------------------------------------------------------------------------------------------------------------------------------------------------------|---------------------------------------------------------------------------------------------------------------------------------------------------------------------------------------------------------------------------------------------------------------------------------------------------------------------------------------------------------------------------------------------------------------------------------------------------------------------------------------------------------------------------------------|

|               |                             |                                   |                                                                                                                                                                                                                                                                    |                                                                                                                                                                                                                                                                                                      |           |   |   |
|---------------|-----------------------------|-----------------------------------|--------------------------------------------------------------------------------------------------------------------------------------------------------------------------------------------------------------------------------------------------------------------|------------------------------------------------------------------------------------------------------------------------------------------------------------------------------------------------------------------------------------------------------------------------------------------------------|-----------|---|---|
|               |                             |                                   |                                                                                                                                                                                                                                                                    | W.T.Aiton [Oleaceae],<br>Eclipta prostrata (L.)<br>L. [Asteraceae],<br>Ophiopogon<br>japonicus (Thunb.)<br>Ker Gawl.<br>[Asparagaceae],<br>Dioscorea japonica<br>Thunb.<br>[Dioscoreaceae],<br>Dictamnus<br>dasycarpus Turcz.<br>[Rutaceae],<br>Glycyrrhiza uralensis<br>Fisch. ex DC.<br>[Fabaceae] |           |   |   |
| Sun<br>(2015) | Qingrexiaoyi<br>n decoction | Prepared<br>by<br>Researcher<br>s | <i>Lonicerae flos,</i><br><i>Smilax glabrae</i><br><i>rhizoma,</i><br><i>Hedyotidis herba,</i><br><i>Scutellariae</i><br><i>barbatae herba,</i><br><i>Sophorae</i><br><i>tonkinensis radix</i><br><i>et rhizoma,</i><br><i>Lithospermi</i><br><i>radix, Rubiae</i> | Lonicera japonica<br>Thunb.<br>[Caprifoliaceae],<br>Smilax glabra Roxb.<br>[Smilacaceae],<br>Scleromitron<br>diffusum (Willd.)<br>R.J.Wang<br>[Rubiaceae],<br>Scutellaria barbata<br>D.Don [Lamiaceae],                                                                                              | Decoction | N | N |

|      |          |          |                                                                                                                                                                                                                                     |                                                                                                                                                                                                                                                                                                                                                                                                                                                                                                                      |        |   |   |
|------|----------|----------|-------------------------------------------------------------------------------------------------------------------------------------------------------------------------------------------------------------------------------------|----------------------------------------------------------------------------------------------------------------------------------------------------------------------------------------------------------------------------------------------------------------------------------------------------------------------------------------------------------------------------------------------------------------------------------------------------------------------------------------------------------------------|--------|---|---|
|      |          |          | <i>radix, Ecliptae</i><br><i>herba, Sophorae</i><br><i>flos, Zaocys,</i><br><i>Dictamni radices</i><br><i>cortex, Sophorae</i><br><i>radix, Cicadidae</i><br><i>periostracum,</i><br><i>Glycyrrhizae</i><br><i>radix et rhizoma</i> | Sophora tonkinensis<br>Gagnep. [Fabaceae],<br>Arnebia euchroma<br>(Royle ex Benth.)<br>I.M.Johnst.<br>[Boraginaceae], Rubia<br>tinctorum L.<br>[Rubiaceae], Eclipta<br>prostrata (L.) L.<br>[Asteraceae],<br>Styphnolobium<br>japonicum (L.) Schott<br>[Fabaceae], Zaocys<br>dhumnades Cantor<br>[Colubridae],<br>Dictamnus<br>dasycarpus Turcz.<br>[Rutaceae], Sophora<br>flavescens Aiton<br>[Fabaceae],<br>Cryptotympana<br>dubia (Haupt)<br>[Cicadidae],<br>Glycyrrhiza uralensis<br>Fisch. ex DC.<br>[Fabaceae] |        |   |   |
| Wang | Compound | Commerci | <i>Glycyrrhizae</i>                                                                                                                                                                                                                 | Glycyrrhiza uralensis                                                                                                                                                                                                                                                                                                                                                                                                                                                                                                | Liquid | N | N |

|                 |                            |                                                                        |                                                                                                                                                                                                                                                                                                                                                        |                                                                                                                                                                                                                                                                                                                                                                                                                         |           |   |   |
|-----------------|----------------------------|------------------------------------------------------------------------|--------------------------------------------------------------------------------------------------------------------------------------------------------------------------------------------------------------------------------------------------------------------------------------------------------------------------------------------------------|-------------------------------------------------------------------------------------------------------------------------------------------------------------------------------------------------------------------------------------------------------------------------------------------------------------------------------------------------------------------------------------------------------------------------|-----------|---|---|
| (2015a)         | glycyrrhizin               | al supplier<br>Henan Xin<br>Shuaike<br>Pharmaceu<br>tical Co.,<br>LTD. | <i>radix et rhizoma</i>                                                                                                                                                                                                                                                                                                                                | Fisch. ex DC.<br>[Fabaceae]                                                                                                                                                                                                                                                                                                                                                                                             |           |   |   |
| Wang<br>(2015b) | Researcher<br>prescription | Prepared<br>by<br>Researcher<br>s                                      | <i>Bubalus bubalis</i> ,<br><i>Lonicerae flos</i> ,<br><i>Paeoniae radix</i><br><i>rubra</i> , <i>Dictamni</i><br><i>radicis cortex</i> ,<br><i>Moutan radicis</i><br><i>cortex</i> , <i>Coptis</i><br><i>chinensis</i> ,<br><i>Forsythiae</i><br><i>fructus</i> , <i>Sophorae</i><br><i>radix</i> ,<br><i>Glycyrrhizae</i><br><i>radix et rhizoma</i> | Bubalus bubalis<br>Linné [Bovidae],<br>Lonicera japonica<br>Thunb.<br>[Caprifoliaceae],<br>Paeonia anomala<br>subsp. veitchii<br>(Lynch) D.Y.Hong &<br>K.Y.Pan<br>[Paeoniaceae],<br>Dictamnus<br>dasycarpus Turcz.<br>[Rutaceae], Paeonia ×<br>suffruticosa Andrews<br>[Paeoniaceae], Coptis<br>chinensis Franch.<br>[Ranunculaceae],<br>Forsythia suspensa<br>(Thunb.) Vahl<br>[Oleaceae], Sophora<br>flavescens Aiton | Decoction | N | N |

|                 |                           |                                                                                  |                                                                                                                                                                                                                                                                                             |                                                                                                                                                                                                                                                                                                                                                                                                                                                            |         |   |   |
|-----------------|---------------------------|----------------------------------------------------------------------------------|---------------------------------------------------------------------------------------------------------------------------------------------------------------------------------------------------------------------------------------------------------------------------------------------|------------------------------------------------------------------------------------------------------------------------------------------------------------------------------------------------------------------------------------------------------------------------------------------------------------------------------------------------------------------------------------------------------------------------------------------------------------|---------|---|---|
|                 |                           |                                                                                  |                                                                                                                                                                                                                                                                                             | [Fabaceae],<br>Glycyrrhiza uralensis<br>Fisch. ex DC.                                                                                                                                                                                                                                                                                                                                                                                                      |         |   |   |
|                 |                           |                                                                                  |                                                                                                                                                                                                                                                                                             | [Fabaceae]                                                                                                                                                                                                                                                                                                                                                                                                                                                 |         |   |   |
| Wang<br>(2015c) | Danggui-<br>yinzi granule | Commercial supplier<br>Guangdong Yifang<br>Chinese Herbal<br>Pieces Co.,<br>LTD. | <i>Angelicae<br/>sinensis radix,<br/>Paeonia lactiflora,<br/>Cnidii rhizoma,<br/>Rehmanniae radix<br/>recens, Tribuli<br/>fructus, Polygoni<br/>multiflori radix,<br/>Astragali radix,<br/>Saposhnikoviae<br/>radix,<br/>Schizonepetae<br/>spica,<br/>Glycyrrhizae<br/>radix et rhizoma</i> | Angelica sinensis<br>(Oliv.) Diels<br>[Apiaceae], Paeonia<br>lactiflora Pall.<br>[Paeoniaceae](Paeoni<br>a lactiflora Alba),<br>Conioselinum<br>anthriscoides<br>'Chuanxiong'<br>[Apiaceae],<br>Rehmannia glutinosa<br>(Gaertn.) DC.<br>[Orobanchaceae](Reh<br>manniae Radix<br>Recens), Tribulus<br>terrestris L.<br>[Zygophyllaceae],<br>Reynoutria multiflora<br>(Thunb.) Moldenke<br>[Polygonaceae],<br>Astragalus<br>mongholicus Bunge<br>[Fabaceae], | Granule | N | N |

|                |                             |                                   |                                                                                                                                                                                                                                                                                                                                                                                                                                                         |                                                                                                                                                                                                                                                                                                                                                        |           |   |   |
|----------------|-----------------------------|-----------------------------------|---------------------------------------------------------------------------------------------------------------------------------------------------------------------------------------------------------------------------------------------------------------------------------------------------------------------------------------------------------------------------------------------------------------------------------------------------------|--------------------------------------------------------------------------------------------------------------------------------------------------------------------------------------------------------------------------------------------------------------------------------------------------------------------------------------------------------|-----------|---|---|
|                |                             |                                   |                                                                                                                                                                                                                                                                                                                                                                                                                                                         | Saposhnikovia<br>divaricata (Turcz. ex<br>Ledeb.) Schischk.<br>[Apiaceae], Nepeta<br>tenuifolia Benth.<br>[Lamiaceae],<br>Glycyrrhiza uralensis<br>Fisch. ex DC.<br>[Fabaceae]                                                                                                                                                                         |           |   |   |
| Yuan<br>(2015) | Qingrexiaoyi<br>n decoction | Prepared<br>by<br>Researcher<br>s | <i>Lonicerae flos,</i><br><i>Smilax glabrae</i><br><i>rhizoma,</i><br><i>Hedyotidis herba,</i><br><i>Scutellariae</i><br><i>barbatae herba,</i><br><i>Sophorae</i><br><i>tonkinensis radix</i><br><i>et rhizoma,</i><br><i>Lithospermi</i><br><i>radix, Rubiae</i><br><i>radix, Ecliptae</i><br><i>herba, Sophorae</i><br><i>flos, Zaocys,</i><br><i>Dictamni radicis</i><br><i>cortex, Sophorae</i><br><i>radix, Cicadidae</i><br><i>periostracum,</i> | Lonicera japonica<br>Thunb.<br>[Caprifoliaceae],<br>Smilax glabra Roxb.<br>[Smilacaceae],<br>Scleromitron<br>diffusum (Willd.)<br>R.J.Wang<br>[Rubiaceae],<br>Scutellaria barbata<br>D.Don [Lamiaceae],<br>Sophora tonkinensis<br>Gagnep. [Fabaceae],<br>Arnebia euchroma<br>(Royle ex Benth.)<br>I.M.Johnst.<br>[Boraginaceae], Rubia<br>tinctorum L. | Decoction | N | N |



|                  |                            |                               |                                                                                                                                                               |                                                                                                                                                                                                                                                                                                                                                                       |           |   |   |
|------------------|----------------------------|-------------------------------|---------------------------------------------------------------------------------------------------------------------------------------------------------------|-----------------------------------------------------------------------------------------------------------------------------------------------------------------------------------------------------------------------------------------------------------------------------------------------------------------------------------------------------------------------|-----------|---|---|
|                  |                            |                               | <i>Glycyrrhizae<br/>radix et rhizoma</i>                                                                                                                      | [Rubiaceae], Eclipta<br>prostrata (L.) L.<br>[Asteraceae],<br>Styphnolobium<br>japonicum (L.) Schott<br>[Fabaceae], Zaocys<br>dhumnades Cantor<br>[Colubridae],<br>Dictamnus<br>dasycarpus Turcz.<br>[Rutaceae], Sophora<br>flavescens Aiton<br>[Fabaceae],<br>Cryptotympana<br>dubia (Haupt)<br>[Cicadidae],<br>Glycyrrhiza uralensis<br>Fisch. ex DC.<br>[Fabaceae] |           |   |   |
| Zhang<br>(2015a) | Liangxuerunfu<br>decoction | Prepared<br>by<br>Researchers | <i>Smilax glabrae<br/>rhizoma, Isatidis<br/>folium,<br/>Rehmanniae radix<br/>recens, Salviae<br/>miltiorrhizae<br/>radix, Imperatae<br/>rhizoma, Paeoniae</i> | Smilax glabra Roxb.<br>[Smilacaceae], Isatis<br>tinctoria subsp.<br>tinctoria<br>[Brassicaceae],<br>Rehmannia glutinosa<br>(Gaertn.) DC.<br>[Orobanchaceae](Reh                                                                                                                                                                                                       | Decoction | N | N |

---

|                           |                       |
|---------------------------|-----------------------|
| <i>radix rubra,</i>       | manniae Radix         |
| <i>Dictamni radice</i>    | Recens), Salvia       |
| <i>cortex,</i>            | multiorrhiza Bunge    |
| <i>Saposhnikoviae</i>     | [Lamiaceae],          |
| <i>radix, Tribuli</i>     | Imperata cylindrica   |
| <i>fructus, Sophorae</i>  | (L.) Raeusch.         |
| <i>flos, Solani nigri</i> | [Poaceae], Paeonia    |
| <i>herba, Moutan</i>      | anomala subsp.        |
| <i>radicis cortex,</i>    | veitchii (Lynch)      |
| <i>Glycyrrhizae</i>       | D.Y.Hong & K.Y.Pan    |
| <i>radix et rhizoma</i>   | [Paeoniaceae],        |
|                           | Dictamnus             |
|                           | dasycarpus Turcz.     |
|                           | [Rutaceae],           |
|                           | Saposhnikovia         |
|                           | divaricata (Turcz. ex |
|                           | Ledeb.) Schischk.     |
|                           | [Apiaceae], Tribulus  |
|                           | terrestris L.         |
|                           | [Zygophyllaceae],     |
|                           | Styphnolobium         |
|                           | japonicum (L.) Schott |
|                           | [Fabaceae], Solanum   |
|                           | nigrum L.             |
|                           | [Solanaceae], Paeonia |
|                           | × suffruticosa        |
|                           | Andrews               |

|                  |                             |                                                                            |                                                                                                                                                                                                                                                                                                                                                                                                                                           |                                                                                                                                                                                                                                                                                                                            |           |   |   |
|------------------|-----------------------------|----------------------------------------------------------------------------|-------------------------------------------------------------------------------------------------------------------------------------------------------------------------------------------------------------------------------------------------------------------------------------------------------------------------------------------------------------------------------------------------------------------------------------------|----------------------------------------------------------------------------------------------------------------------------------------------------------------------------------------------------------------------------------------------------------------------------------------------------------------------------|-----------|---|---|
|                  |                             |                                                                            |                                                                                                                                                                                                                                                                                                                                                                                                                                           | [Paeoniaceae],<br>Glycyrrhiza uralensis<br>Fisch. ex DC.<br>[Fabaceae]                                                                                                                                                                                                                                                     |           |   |   |
| Zhang<br>(2015b) | Yinxie<br>capsule           | Commercial supplier<br>Xinjiang<br>Weiatang<br>Pharmaceutical Co.,<br>LTD. | <i>Smilax glabrae</i><br><i>rhizoma</i> , <i>Smilacis</i><br><i>chinae rhizoma</i>                                                                                                                                                                                                                                                                                                                                                        | Smilax glabra Roxb.<br>[Smilacaceae], Smilax<br>china L.<br>[Smilacaceae]                                                                                                                                                                                                                                                  | Capsule   | N | N |
| Zhang<br>(2015c) | Zinyinqingre<br>xiaofengsan | Prepared<br>by<br>Researchers                                              | <i>Rehmanniae radix</i><br><i>recens</i> , <i>Moutan</i><br><i>radicis cortex</i> ,<br><i>Liriope seu</i><br><i>ophiopogonis</i><br><i>yuber</i> ,<br><i>Scrophulariae</i><br><i>radix</i> , <i>Salviae</i><br><i>miltiorrhizae</i><br><i>radix</i> , <i>Cannabis</i><br><i>semen</i> , <i>Isatidis</i><br><i>folium</i> , <i>Sophorae</i><br><i>tonkinensis radix</i><br><i>et rhizoma</i> ,<br><i>Dictamni radicis</i><br><i>cortex</i> | Rehmannia glutinosa<br>(Gaertn.) DC.<br>[Orobanchaceae](Reh<br>manniae Radix<br>Recens), Paeonia ×<br>suffruticosa Andrews<br>[Paeoniaceae],<br>Ophiopogon<br>japonicus (Thunb.)<br>Ker Gawl.<br>[Asparagaceae],<br>Scrophularia<br>ningpoensis Hemsl.<br>[Scrophulariaceae],<br>Salvia miltiorrhiza<br>Bunge [Lamiaceae], | Decoction | N | N |

|                |                            |                                   |                                                                                                                                                                                                                                                                                                             |                                                                                                                                                                                                                                                                                                                                               |           |   |   |
|----------------|----------------------------|-----------------------------------|-------------------------------------------------------------------------------------------------------------------------------------------------------------------------------------------------------------------------------------------------------------------------------------------------------------|-----------------------------------------------------------------------------------------------------------------------------------------------------------------------------------------------------------------------------------------------------------------------------------------------------------------------------------------------|-----------|---|---|
|                |                            |                                   |                                                                                                                                                                                                                                                                                                             | Cannabis sativa L.<br>[Cannabaceae], Isatis<br>tinctoria subsp.<br>tinctoria<br>[Brassicaceae],<br>Sophora tonkinensis<br>Gagnep. [Fabaceae],<br>Dictamnus<br>dasycarpus Turcz.<br>[Rutaceae]                                                                                                                                                 |           |   |   |
| Chen<br>(2016) | Researcher<br>prescription | Prepared<br>by<br>Researcher<br>s | <i>Persicae semen,</i><br><i>Curcumae</i><br><i>rhizoma,</i><br><i>Sparganii</i><br><i>rhizoma,</i><br><i>Euonymi ramuli</i><br><i>suberalatum ,</i><br><i>Spatholobi caulis,</i><br><i>Citri nnshius</i><br><i>pericarpium,</i><br><i>Carthami flos,</i><br><i>Prunellae spica,</i><br><i>Coicis semen</i> | Prunus persica (L.)<br>Batsch [Rosaceae],<br>Curcuma phaeocaulis<br>Valeton<br>[Zingiberaceae],<br>Sparganium<br>stoloniferum (Buch.-<br>Ham. ex Graebn.)<br>Buch.-Ham. ex Juz.<br>[Typhaceae],<br>Euonymus alatus<br>(Thunb.) Siebold<br>[Celastraceae],<br>Spatholobus<br>suberectus Dunn<br>[Fabaceae], Citrus ×<br>aurantium f. deliciosa | Decoction | N | N |

|               |                            |                               |                                                                                                                                                                                                                                                                                                                                                                                                                                                                                                                                    |                                                                                                                                                                                                                                                                                                                                                                                                                                                                         |           |   |   |
|---------------|----------------------------|-------------------------------|------------------------------------------------------------------------------------------------------------------------------------------------------------------------------------------------------------------------------------------------------------------------------------------------------------------------------------------------------------------------------------------------------------------------------------------------------------------------------------------------------------------------------------|-------------------------------------------------------------------------------------------------------------------------------------------------------------------------------------------------------------------------------------------------------------------------------------------------------------------------------------------------------------------------------------------------------------------------------------------------------------------------|-----------|---|---|
|               |                            |                               |                                                                                                                                                                                                                                                                                                                                                                                                                                                                                                                                    | (Ten.) M.Hiroe<br>[Rutaceae],<br>Carthamus tinctorius<br>L. [Asteraceae],<br>Prunella vulgaris L.<br>[Lamiaceae], Coix<br>lacryma-jobi var. ma-<br>yuen (Rom.Caill.)<br>Stapf [Poaceae]                                                                                                                                                                                                                                                                                 |           |   |   |
| He<br>(2016a) | Liangxuerunfu<br>decoction | Prepared<br>by<br>Researchers | <i>Smilax glabrae</i><br><i>rhizoma</i> , <i>Isatidis</i><br><i>folium</i> ,<br><i>Rehmanniae radix</i><br><i>recens</i> , <i>Salviae</i><br><i>miltiorrhizae</i><br><i>radix</i> , <i>Imperatae</i><br><i>rhizoma</i> , <i>Paeoniae</i><br><i>radix rubra</i> ,<br><i>Dictamni radice</i><br><i>cortex</i> ,<br><i>Saposhnikoviae</i><br><i>radix</i> , <i>Tribuli</i><br><i>fructus</i> , <i>Sophorae</i><br><i>flos</i> , <i>Solani nigri</i><br><i>herba</i> , <i>Moutan</i><br><i>radicis cortex</i> ,<br><i>Glycyrrhizae</i> | <i>Smilax glabra</i> Roxb.<br>[Smilacaceae], <i>Isatis</i><br><i>tinctoria</i> subsp.<br><i>tinctoria</i><br>[Brassicaceae],<br><i>Rehmannia glutinosa</i><br>(Gaertn.) DC.<br>[Orobanchaceae]( <i>Reh</i><br><i>manniae Radix</i><br><i>Recens</i> ), <i>Salvia</i><br><i>miltiorrhiza</i> Bunge<br>[Lamiaceae],<br><i>Imperata cylindrica</i><br>(L.) Raeusch.<br>[Poaceae], <i>Paeonia</i><br><i>anomala</i> subsp.<br><i>veitchii</i> (Lynch)<br>D.Y.Hong & K.Y.Pan | Decoction | N | N |

|               |                          |                                                                          |                                                                                                                                                                      |                                                                                                                                                                                                                                                                                                                                                                                                            |      |   |   |
|---------------|--------------------------|--------------------------------------------------------------------------|----------------------------------------------------------------------------------------------------------------------------------------------------------------------|------------------------------------------------------------------------------------------------------------------------------------------------------------------------------------------------------------------------------------------------------------------------------------------------------------------------------------------------------------------------------------------------------------|------|---|---|
|               |                          |                                                                          | <i>radix et rhizoma</i>                                                                                                                                              | [Paeoniaceae],<br>Dictamnus<br>dasycarpus Turcz.<br>[Rutaceae],<br>Saposhnikovia<br>divaricata (Turcz. ex<br>Ledeb.) Schischk.<br>[Apiaceae], Tribulus<br>terrestris L.<br>[Zygophyllaceae],<br>Styphnolobium<br>japonicum (L.) Schott<br>[Fabaceae], Solanum<br>nigrum L.<br>[Solanaceae], Paeonia<br>× suffruticosa<br>Andrews<br>[Paeoniaceae],<br>Glycyrrhiza uralensis<br>Fisch. ex DC.<br>[Fabaceae] |      |   |   |
| He<br>(2016b) | Compound<br>Qingdai pill | Commercial<br>supplier<br>Shaanxi<br>Tianning<br>Pharmaceu<br>tical Co., | <i>Indigo pulverata</i><br><i>levis</i> , <i>Mume</i><br><i>fructus</i> , <i>Taraxaci</i><br><i>herba</i> ,<br><i>Lithospermi</i><br><i>radix</i> , <i>Angelicae</i> | Persicaria tinctoria<br>(Aiton) Spach<br>[Polygonaceae],<br>Prunus mume<br>(Siebold) Siebold &<br>Zucc. [Rosaceae],                                                                                                                                                                                                                                                                                        | Pill | N | N |

---

|      |                          |                       |
|------|--------------------------|-----------------------|
| LTD. | <i>dahuricae radix,</i>  | Taraxacum             |
|      | <i>Salviae</i>           | mongolicum Hand.-     |
|      | <i>miltiorrhizae</i>     | Mazz. [Asteraceae],   |
|      | <i>radix, Dictamni</i>   | Arnebia euchroma      |
|      | <i>radicis cortex,</i>   | (Royle ex Benth.)     |
|      | <i>Massa medicata</i>    | I.M.Johnst.           |
|      | <i>fermentata,</i>       | [Boraginaceae],       |
|      | <i>Dryopteridis</i>      | Angelica dahurica     |
|      | <i>crassirhizomatis</i>  | (Hoffm.) Benth. &     |
|      | <i>rhizoma, Smilax</i>   | Hook.f. ex Franch. &  |
|      | <i>glabrae rhizoma,</i>  | Sav. [Apiaceae],      |
|      | <i>Portulacae herba,</i> | Salvia miltiorrhiza   |
|      | <i>Dioscorea</i>         | Bunge [Lamiaceae],    |
|      | <i>hypoglauca,</i>       | Dictamnus             |
|      | <i>Crataegi fructus,</i> | dasycarpus Turcz.     |
|      | <i>Schisandrae</i>       | [Rutaceae], Massa     |
|      | <i>fructus</i>           | Medicata Fermentata,  |
|      |                          | Dryopteris            |
|      |                          | crassirhizoma Nakai   |
|      |                          | [Polypodiaceae],      |
|      |                          | Smilax glabra Roxb.   |
|      |                          | [Smilacaceae],        |
|      |                          | Portulaca oleracea L. |
|      |                          | [Portulacaceae],      |
|      |                          | Dioscorea collettii   |
|      |                          | var. hypoglauca       |
|      |                          | (Palib.) S.J.Pei &    |

|                 |                |                                   |                                                                                                                                                                                                                                                                                                                                                             |                                                                                                                                                                                                                                                                                                                                                            |      |   |   |
|-----------------|----------------|-----------------------------------|-------------------------------------------------------------------------------------------------------------------------------------------------------------------------------------------------------------------------------------------------------------------------------------------------------------------------------------------------------------|------------------------------------------------------------------------------------------------------------------------------------------------------------------------------------------------------------------------------------------------------------------------------------------------------------------------------------------------------------|------|---|---|
|                 |                |                                   |                                                                                                                                                                                                                                                                                                                                                             | C.T.Ting<br>[Dioscoreaceae],<br>Crataegus pinnatifida<br>var. pinnatifida<br>[Rosaceae],<br>Schisandra chinensis<br>(Turcz.) Baill.<br>[Schisandraceae]                                                                                                                                                                                                    |      |   |   |
| Jiang<br>(2016) | Yinxiping pill | Prepared<br>by<br>Researcher<br>s | <i>Rehmanniae radix<br/>recens,<br/>Hedyotidis herba,<br/>Scutellariae<br/>barbatae herba,<br/>Isatidis folium,<br/>Paeoniae radix<br/>rubra, Moutan<br/>radicis Cortex,<br/>Salviae<br/>miltiorrhizae<br/>radix,<br/>Lithospermi<br/>radix, Ligustri<br/>fructus, Ecliptae<br/>herba, Liriopis<br/>seu ophiopogonis<br/>tuber, Dioscoreae<br/>rhizoma,</i> | Rehmannia glutinosa<br>(Gaertn.) DC.<br>[Orobanchaceae](Reh<br>manniae Radix<br>Recens),<br>Scleromitron<br>diffusum (Willd.)<br>R.J.Wang<br>[Rubiaceae],<br>Scutellaria barbata<br>D.Don [Lamiaceae],<br>Isatis tinctoria subsp.<br>tinctoria<br>[Brassicaceae],<br>Paeonia anomala<br>subsp. veitchii<br>(Lynch) D.Y.Hong &<br>K.Y.Pan<br>[Paeoniaceae], | Pill | N | N |



|                |                          |                        |                                                                                             |                                                                                                                                                                                                                                                                                                                                                                                                                                                                                                       |        |   |   |
|----------------|--------------------------|------------------------|---------------------------------------------------------------------------------------------|-------------------------------------------------------------------------------------------------------------------------------------------------------------------------------------------------------------------------------------------------------------------------------------------------------------------------------------------------------------------------------------------------------------------------------------------------------------------------------------------------------|--------|---|---|
|                |                          |                        | <i>Dictamni radices</i><br><i>cortex,</i><br><i>Glycyrrhizae</i><br><i>radix et rhizoma</i> | Paeonia × suffruticosa<br>Andrews<br>[Paeoniaceae], Salvia<br>miltiorrhiza Bunge<br>[Lamiaceae], Arnebia<br>euchroma (Royle ex<br>Benth.) I.M.Johnst.<br>[Boraginaceae],<br>Ligustrum lucidum<br>W.T.Aiton [Oleaceae],<br>Eclipta prostrata (L.)<br>L. [Asteraceae],<br>Ophiopogon<br>japonicus (Thunb.)<br>Ker Gawl.<br>[Asparagaceae],<br>Dioscorea japonica<br>Thunb.<br>[Dioscoreaceae],<br>Dictamnus<br>dasycarpus Turcz.<br>[Rutaceae],<br>Glycyrrhiza uralensis<br>Fisch. ex DC.<br>[Fabaceae] |        |   |   |
| Shan<br>(2016) | Compound<br>glycyrrhizin | Commercial<br>supplier | <i>Glycyrrhizae</i><br><i>radix et rhizoma</i>                                              | Glycyrrhiza uralensis<br>Fisch. ex DC.                                                                                                                                                                                                                                                                                                                                                                                                                                                                | Liquid | N | N |

|                 |                    |                                                                                  |                                                                                                                                                                                                                                                                                                                                                       |                                                                                                                                                                                                                                                                                                                                                                                                                              |         |   |   |
|-----------------|--------------------|----------------------------------------------------------------------------------|-------------------------------------------------------------------------------------------------------------------------------------------------------------------------------------------------------------------------------------------------------------------------------------------------------------------------------------------------------|------------------------------------------------------------------------------------------------------------------------------------------------------------------------------------------------------------------------------------------------------------------------------------------------------------------------------------------------------------------------------------------------------------------------------|---------|---|---|
|                 |                    | Fujian<br>Mindong<br>Lijixun<br>Pharmaceu<br>tical Co.,<br>LTD.                  |                                                                                                                                                                                                                                                                                                                                                       | [Fabaceae]                                                                                                                                                                                                                                                                                                                                                                                                                   |         |   |   |
| Wang<br>(2016a) | Xiaoyin<br>granule | Commerci<br>al supplier<br>Shaanxi<br>Kanghui<br>Pharmaceu<br>tical Co.,<br>Ltd. | <i>Rehmanniae radix<br/>recens, Moutan<br/>radicis cortex,<br/>Paeoniae radix<br/>rubra, Angelicae<br/>sinensis radix,<br/>Sophorae radix,<br/>Lonicerae flos,<br/>Scrophulariae<br/>radix, Arctii<br/>fructus, Cicadidae<br/>periostracum,<br/>Dictamni radicis<br/>cortex, Isatidis<br/>folium, Carthami<br/>flos,<br/>Saposhnikoviae<br/>radix</i> | Rehmannia glutinosa<br>(Gaertn.) DC.<br>[Orobanchaceae](Reh<br>manniae Radix<br>Recens), Paeonia ×<br>suffruticosa Andrews<br>[Paeoniaceae],<br>Paeonia anomala<br>subsp. veitchii<br>(Lynch) D.Y.Hong &<br>K.Y.Pan<br>[Paeoniaceae],<br>Angelica sinensis<br>(Oliv.) Diels<br>[Apiaceae], Sophora<br>flavescens Aiton<br>[Fabaceae], Lonicera<br>japonica Thunb.<br>[Caprifoliaceae],<br>Scrophularia<br>ningpoensis Hemsl. | Granule | N | N |

|                 |                      |                                                                         |                                                                                                                                                                                                                   |                                                                                                                                                                                                                                                                                                                                                 |         |   |   |
|-----------------|----------------------|-------------------------------------------------------------------------|-------------------------------------------------------------------------------------------------------------------------------------------------------------------------------------------------------------------|-------------------------------------------------------------------------------------------------------------------------------------------------------------------------------------------------------------------------------------------------------------------------------------------------------------------------------------------------|---------|---|---|
|                 |                      |                                                                         |                                                                                                                                                                                                                   | [Scrophulariaceae],<br>Arctium lappa L.<br>[Asteraceae],<br>Cryptotympana<br>dubia (Haupt)<br>[Cicadidae],<br>Dictamnus<br>dasycarpus Turcz.<br>[Rutaceae], Isatis<br>tinctoria subsp.<br>tinctoria<br>[Brassicaceae],<br>Carthamus tinctorius<br>L. [Asteraceae],<br>Saposhnikovia<br>divaricata (Turcz. ex<br>Ledeb.) Schischk.<br>[Apiaceae] |         |   |   |
| Wang<br>(2016b) | Piminxiao<br>capsule | Commercial supplier<br>Shenyang<br>Aohua<br>Pharmaceutical Co.,<br>Ltd. | <i>Sophorae radix,</i><br><i>Atractylodis</i><br><i>rhizoma,</i><br><i>Saposhnikoviae</i><br><i>radix,</i><br><i>Schizonepetae</i><br><i>spica, Tribuli</i><br><i>fructus, Dictamni</i><br><i>radicis cortex,</i> | Sophora flavescens<br>Aiton [Fabaceae],<br>Atractylodes lancea<br>(Thunb.) DC.<br>[Asteraceae](Atractyl<br>odis Rhizoma),<br>Saposhnikovia<br>divaricata (Turcz. ex<br>Ledeb.) Schischk.                                                                                                                                                        | Capsule | N | N |

---

|                            |                         |
|----------------------------|-------------------------|
| <i>Cnidi fructus,</i>      | [Apiaceae], Nepeta      |
| <i>Xanthii fructus,</i>    | tenuifolia Benth.       |
| <i>Scolopendra,</i>        | [Lamiaceae], Tribulus   |
| <i>Indigo pulverata</i>    | terrestris L.           |
| <i>levis, Taraxaci</i>     | [Zygophyllaceae],       |
| <i>herba, Viola</i>        | Dictamnus               |
| <i>herba,</i>              | dasycarpus Turcz.       |
| <i>Scutellariae radix,</i> | [Rutaceae], Cnidium     |
| <i>Phellodendri</i>        | monnieri (L.) Cusson    |
| <i>cortex, Coptis</i>      | [Apiaceae], Xanthium    |
| <i>chinensis,</i>          | strumarium L.           |
| <i>Cicadidae</i>           | [Asteraceae],           |
| <i>periostracum,</i>       | Scolopendra             |
| <i>Rehmanniae radix</i>    | subspinipes mutilans    |
| <i>recens , Moutan</i>     | Linné Koch              |
| <i>radicis cortex,</i>     | [Scolopendridae],       |
| <i>Chinese tamarisk</i>    | Persicaria tinctoria    |
| <i>twing,</i>              | (Aiton) Spach           |
| <i>Lithospermi</i>         | [Polygonaceae],         |
| <i>radix, Lycii</i>        | Taraxacum               |
| <i>radicis cortex</i>      | mongolicum Hand.-       |
|                            | Mazz. [Asteraceae],     |
|                            | Viola mandshurica       |
|                            | W.Becker [Violaceae],   |
|                            | Scutellaria baicalensis |
|                            | Georgi [Lamiaceae],     |
|                            | Phellodendron           |

---

|              |                    |                                               |                                                                                                     |                                                                                                                                                                                                                                                                                                                                                                                                                                                           |         |   |   |
|--------------|--------------------|-----------------------------------------------|-----------------------------------------------------------------------------------------------------|-----------------------------------------------------------------------------------------------------------------------------------------------------------------------------------------------------------------------------------------------------------------------------------------------------------------------------------------------------------------------------------------------------------------------------------------------------------|---------|---|---|
|              |                    |                                               |                                                                                                     | chinense<br>C.K.Schneid.<br>[Rutaceae], Coptis<br>chinensis Franch.<br>[Ranunculaceae],<br>Cryptotympana<br>dubia (Haupt)<br>[Cicadidae],<br>Rehmannia glutinosa<br>(Gaertn.) DC.<br>[Orobanchaceae](Reh<br>manniae Radix<br>Recens) , Paeonia ×<br>suffruticosa Andrews<br>[Paeoniaceae],<br>Tamarix chinensis<br>Lour. [Tamaricaceae],<br>Arnebia euchroma<br>(Royle ex Benth.)<br>I.M.Johnst.<br>[Boraginaceae],<br>Lycium barbarum L.<br>[Solanaceae] |         |   |   |
| Wu<br>(2016) | Xiaoyin<br>granule | Commerci<br>al supplier<br>Shaanxi<br>Kanghui | <i>Rehmanniae radix</i><br><i>recens, Moutan</i><br><i>radicis cortex,</i><br><i>Paeoniae radix</i> | Rehmannia glutinosa<br>(Gaertn.) DC.<br>[Orobanchaceae](Reh<br>manniae Radix                                                                                                                                                                                                                                                                                                                                                                              | Granule | N | N |

---

|                            |      |                                                                                                                                                                                                                                                                        |                                                                                                                                                                                                                                                                                                                                                                                                                                                                                                                                        |
|----------------------------|------|------------------------------------------------------------------------------------------------------------------------------------------------------------------------------------------------------------------------------------------------------------------------|----------------------------------------------------------------------------------------------------------------------------------------------------------------------------------------------------------------------------------------------------------------------------------------------------------------------------------------------------------------------------------------------------------------------------------------------------------------------------------------------------------------------------------------|
| Pharmaceu<br>tical<br>Ltd. | Co., | <i>rubra, Angelicae<br/>sinensis radix,<br/>Sophorae radix,<br/>Lonicerae flos,<br/>Scrophulariae<br/>radix, Arctii<br/>fructus, Cicadidae<br/>periostracum,<br/>Dictamni radices<br/>cortex, Isatidis<br/>folium, Carthami<br/>flos,<br/>Saposhnikoviae<br/>radix</i> | Recens), Paeonia ×<br>suffruticosa Andrews<br>[Paeoniaceae],<br>Paeonia anomala<br>subsp. veitchii<br>(Lynch) D.Y.Hong &<br>K.Y.Pan<br>[Paeoniaceae],<br>Angelica sinensis<br>(Oliv.) Diels<br>[Apiaceae], Sophora<br>flavescens Aiton<br>[Fabaceae], Lonicera<br>japonica Thunb.<br>[Caprifoliaceae],<br>Scrophularia<br>ningpoensis Hemsl.<br>[Scrophulariaceae],<br>Arctium lappa L.<br>[Asteraceae],<br>Cryptotympana<br>dubia (Haupt)<br>[Cicadidae],<br>Dictamnus<br>dasycarpus Turcz.<br>[Rutaceae], Isatis<br>tinctoria subsp. |
|----------------------------|------|------------------------------------------------------------------------------------------------------------------------------------------------------------------------------------------------------------------------------------------------------------------------|----------------------------------------------------------------------------------------------------------------------------------------------------------------------------------------------------------------------------------------------------------------------------------------------------------------------------------------------------------------------------------------------------------------------------------------------------------------------------------------------------------------------------------------|

---

|               |                    |                                                                                  |                                                                                                                                                                                                                                                                                                                                                                                                                                                                                                                               |                                                                                                                                                                                                                                                                                                                                                                                                                     |         |   |   |
|---------------|--------------------|----------------------------------------------------------------------------------|-------------------------------------------------------------------------------------------------------------------------------------------------------------------------------------------------------------------------------------------------------------------------------------------------------------------------------------------------------------------------------------------------------------------------------------------------------------------------------------------------------------------------------|---------------------------------------------------------------------------------------------------------------------------------------------------------------------------------------------------------------------------------------------------------------------------------------------------------------------------------------------------------------------------------------------------------------------|---------|---|---|
|               |                    |                                                                                  |                                                                                                                                                                                                                                                                                                                                                                                                                                                                                                                               | <p>tinctoria<br/>[Brassicaceae],<br/>Carthamus tinctorius<br/>L. [Asteraceae],<br/>Saposhnikovia<br/>divaricata (Turcz. ex<br/>Ledeb.) Schischk.<br/>[Apiaceae]</p>                                                                                                                                                                                                                                                 |         |   |   |
| Xie<br>(2016) | Xiaoyin<br>granule | Commerci<br>al supplier<br>Shaanxi<br>Kanghui<br>Pharmaceu<br>tical Co.,<br>Ltd. | <p><i>Rehmanniae radix</i><br/><i>recens</i>, <i>Moutan</i><br/><i>radicis cortex</i>,<br/><i>Paeoniae radix</i><br/><i>rubra</i>, <i>Angelicae</i><br/><i>sinensis radix</i>,<br/><i>Sophorae radix</i>,<br/><i>Lonicerae flos</i>,<br/><i>Scrophulariae</i><br/><i>radix</i>, <i>Arctii</i><br/><i>fructus</i>, <i>Cicadidae</i><br/><i>periostracum</i>,<br/><i>Dictamni radicis</i><br/><i>cortex</i>, <i>Isatidis</i><br/><i>folium</i>, <i>Carthami</i><br/><i>flos</i>,<br/><i>Saposhnikoviae</i><br/><i>radix</i></p> | <p>Rehmannia glutinosa<br/>(Gaertn.) DC.<br/>[Orobanchaceae](Reh<br/>manniae Radix<br/>Recens), Paeonia ×<br/>suffruticosa Andrews<br/>[Paeoniaceae],<br/>Paeonia anomala<br/>subsp. veitchii<br/>(Lynch) D.Y.Hong &amp;<br/>K.Y.Pan<br/>[Paeoniaceae],<br/>Angelica sinensis<br/>(Oliv.) Diels<br/>[Apiaceae], Sophora<br/>flavescens Aiton<br/>[Fabaceae], Lonicera<br/>japonica Thunb.<br/>[Caprifoliaceae],</p> | Granule | N | N |

|              |                          |                                                                                    |                                                   |                                                                                                                                                                                                                                                                                                                                                                                       |        |   |   |  |
|--------------|--------------------------|------------------------------------------------------------------------------------|---------------------------------------------------|---------------------------------------------------------------------------------------------------------------------------------------------------------------------------------------------------------------------------------------------------------------------------------------------------------------------------------------------------------------------------------------|--------|---|---|--|
|              |                          |                                                                                    |                                                   | Scrophularia<br>ningpoensis Hemsl.<br>[Scrophulariaceae],<br>Arctium lappa L.<br>[Asteraceae],<br>Cryptotympana<br>dubia (Haupt)<br>[Cicadidae],<br>Dictamnus<br>dasycarpus Turcz.<br>[Rutaceae], Isatis<br>tinctoria subsp.<br>tinctoria<br>[Brassicaceae],<br>Carthamus tinctorius<br>L. [Asteraceae],<br>Saposhnikovia<br>divaricata (Turcz. ex<br>Ledeb.) Schischk.<br>[Apiaceae] |        |   |   |  |
| Xu<br>(2016) | Compound<br>glycyrrhizin | Commerci<br>al supplier<br>Fujian<br>Mindong<br>Lijixun<br>Pharmaceu<br>tical Co., | <i>Glycyrrhizae<br/>         radix et rhizoma</i> | Glycyrrhiza uralensis<br>Fisch. ex DC.<br>[Fabaceae]                                                                                                                                                                                                                                                                                                                                  | Liquid | N | N |  |



| LTD.         |                          |                         |                                                                                                                                                                                       |                                                                                                                                                                                                                                      |           |   |  |   |
|--------------|--------------------------|-------------------------|---------------------------------------------------------------------------------------------------------------------------------------------------------------------------------------|--------------------------------------------------------------------------------------------------------------------------------------------------------------------------------------------------------------------------------------|-----------|---|--|---|
| Yang (2016a) | Qinmei granule           | Prepared by Researchers | <i>Scutellariae radix, Indigo pulverata levis, Angelicae sinensis radix, Astragali radix, Mume fructus</i>                                                                            | Scutellaria baicalensis Georgi [Lamiaceae], Persicaria tinctoria (Aiton) Spach [Polygonaceae], Angelica sinensis (Oliv.) Diels [Apiaceae], Astragalus mongholicus Bunge [Fabaceae], Prunus mume (Siebold) Siebold & Zucc. [Rosaceae] | Granule   | N |  | N |
| Yang (2016b) | Qingreliangxue decoction | Prepared by Researchers | <i>Bubalus bubalis, Rehmanniae radix recens, Lithospermum radix, Moutan radicis cortex, Sophorae flos, Isatidis folium, Smilax glabrae rhizoma, Scutellariae radix, Rhei radix et</i> | Bubalus bubalis Linné [Bovidae], Rehmannia glutinosa (Gaertn.) DC. [Orobanchaceae](Rehmanniae Radix Recens), Arnebia euchroma (Royle ex Benth.) I.M.Johnst. [Boraginaceae], Paeonia × suffruticosa Andrews                           | Decoction | N |  | N |

|              |                              |                                   |                                                                                                                                                                                                                                              |                                                                                                                                                                                                                                                                                                                                                   |           |   |  |   |
|--------------|------------------------------|-----------------------------------|----------------------------------------------------------------------------------------------------------------------------------------------------------------------------------------------------------------------------------------------|---------------------------------------------------------------------------------------------------------------------------------------------------------------------------------------------------------------------------------------------------------------------------------------------------------------------------------------------------|-----------|---|--|---|
|              |                              |                                   | <i>rhizoma,</i><br><i>Curcumae radix,</i><br><i>Vespae nidus</i>                                                                                                                                                                             | [Paeoniaceae],<br>Styphnolobium<br>japonicum (L.) Schott<br>[Fabaceae], Isatis<br>tinctoria subsp.<br>tinctoria<br>[Brassicaceae], Smilax<br>glabra Roxb.<br>[Smilacaceae],<br>Scutellaria baicalensis<br>Georgi [Lamiaceae],<br>Rheum officinale<br>Baill. [Polygonaceae],<br>Curcuma phaeocaulis<br>Valeton<br>[Zingiberaceae],<br>Vespae Nidus |           |   |  |   |
| Yu<br>(2016) | Qingreliangx<br>ue decoction | Prepared<br>by<br>Researcher<br>s | <i>Bubalus bubalis,</i><br><i>Rehmanniae radix</i><br><i>recens,</i><br><i>Lithospermi</i><br><i>radix, Moutan</i><br><i>radicis cortex,</i><br><i>Sophorae flos,</i><br><i>Isatidis folium,</i><br><i>Smilax glabrae</i><br><i>rhizoma,</i> | Bubalus bubalis<br>Linné [Bovidae],<br>Rehmannia glutinosa<br>(Gaertn.) DC.<br>[Orobanchaceae](Reh<br>manniae Radix<br>Recens), Arnebia<br>euchroma (Royle ex<br>Benth.) I.M.Johnst.<br>[Boraginaceae],                                                                                                                                           | Decoction | N |  | N |

|               |                          |                                                                                    |                                                                                                                        |                                                                                                                                                                                                                                                                                                                                                                                        |        |   |   |
|---------------|--------------------------|------------------------------------------------------------------------------------|------------------------------------------------------------------------------------------------------------------------|----------------------------------------------------------------------------------------------------------------------------------------------------------------------------------------------------------------------------------------------------------------------------------------------------------------------------------------------------------------------------------------|--------|---|---|
|               |                          |                                                                                    | <i>Scutellariae</i><br><i>adixm, Rhei radix</i><br><i>et rhizoma,</i><br><i>Curcumae radix,</i><br><i>Vespae nidus</i> | Paeonia × suffruticosa<br>Andrews<br>[Paeoniaceae],<br>Styphnolobium<br>japonicum (L.) Schott<br>[Fabaceae], Isatis<br>tinctoria subsp.<br>tinctoria<br>[Brassicaceae], Smilax<br>glabra Roxb.<br>[Smilacaceae],<br>Scutellaria baicalensis<br>Georgi [Lamiaceae],<br>Rheum officinale<br>Baill. [Polygonaceae],<br>Curcuma phaeocaulis<br>Valeton<br>[Zingiberaceae],<br>Vespae Nidus |        |   |   |
| Cao<br>(2017) | Compound<br>glycyrrhizin | Commerci<br>al supplier<br>Henan Xin<br>Shuaike<br>Pharmaceu<br>tical Co.,<br>LTD. | <i>Glycyrrhizae</i><br><i>radix et rhizoma</i>                                                                         | Glycyrrhiza uralensis<br>Fisch. ex DC.<br>[Fabaceae]                                                                                                                                                                                                                                                                                                                                   | Tablet | N | N |
| Cheng         | Compound                 | Commerci                                                                           | <i>Glycyrrhizae</i>                                                                                                    | Glycyrrhiza uralensis                                                                                                                                                                                                                                                                                                                                                                  | Tablet | N | N |

|                |                                    |                                                                        |                                                                                                                                                                                                                                                                                                                                                                                                    |                                                                                                                                                                                                                                                                                                                                                                                     |           |   |   |
|----------------|------------------------------------|------------------------------------------------------------------------|----------------------------------------------------------------------------------------------------------------------------------------------------------------------------------------------------------------------------------------------------------------------------------------------------------------------------------------------------------------------------------------------------|-------------------------------------------------------------------------------------------------------------------------------------------------------------------------------------------------------------------------------------------------------------------------------------------------------------------------------------------------------------------------------------|-----------|---|---|
| (2017)         | glycyrrhizin                       | al supplier<br>Henan Xin<br>Shuaike<br>Pharmaceu<br>tical Co.,<br>LTD. | <i>radix et rhizoma</i>                                                                                                                                                                                                                                                                                                                                                                            | Fisch. ex DC.<br>[Fabaceae]                                                                                                                                                                                                                                                                                                                                                         |           |   |   |
| Ding<br>(2017) | Ziyinhuoxuer<br>unzao<br>decoction | Prepared<br>by<br>Researcher<br>s                                      | <i>Testudinis<br/>chinemis<br/>plastrum et<br/>carapax, Ostreae<br/>testa,<br/>Rehmanniae radix<br/>recens ,<br/>Scrophulariae<br/>radix, Asparagi<br/>tuber, Liriopsis seu<br/>ophiopogonis<br/>tuber, Polygoni<br/>multiflori radix,<br/>Spatholobi caulis,<br/>Paeoniae radix<br/>rubra , Prunellae<br/>spica, Hedyotidis<br/>herba, Curcumae<br/>rhizoma,<br/>Trichosanthes<br/>kirilowii,</i> | Chinemys reevesii<br>Gray [Emydidae],<br>Ostrea gigas<br>Thunberg<br>[Ostreidae],<br>Rehmannia glutinosa<br>(Gaertn.) DC.<br>[Orobanchaceae](Reh<br>manniae Radix<br>Recens) ,<br>Scrophularia<br>ningpoensis Hemsl.<br>[Scrophulariaceae],<br>Asparagus<br>cochinchinensis<br>(Lour.) Merr.<br>[Asparagaceae],<br>Ophiopogon<br>japonicus (Thunb.)<br>Ker Gawl.<br>[Asparagaceae], | Decoction | N | N |

---

|                         |                       |
|-------------------------|-----------------------|
| <i>Forsythiae</i>       | Reynoutria multiflora |
| <i>fructus,</i>         | (Thunb.) Moldenke     |
| <i>Glycyrrhizae</i>     | [Polygonaceae],       |
| <i>radix et rhizoma</i> | Spatholobus           |
|                         | suberectus Dunn       |
|                         | [Fabaceae], Paeonia   |
|                         | anomala subsp.        |
|                         | veitchii (Lynch)      |
|                         | D.Y.Hong & K.Y.Pan    |
|                         | [Paeoniaceae] ,       |
|                         | Prunella vulgaris L.  |
|                         | [Lamiaceae],          |
|                         | Scleromitron          |
|                         | diffusum (Willd.)     |
|                         | R.J.Wang              |
|                         | [Rubiaceae],          |
|                         | Curcuma phaeocaulis   |
|                         | Valeton               |
|                         | [Zingiberaceae],      |
|                         | Trichosanthes         |
|                         | kirilowii Maxim.      |
|                         | [Cucurbitaceae],      |
|                         | Forsythia suspensa    |
|                         | (Thunb.) Vahl         |
|                         | [Oleaceae],           |
|                         | Glycyrrhiza uralensis |
|                         | Fisch. ex DC.         |

---

| [Fabaceae]     |                                                    |                                                                               |                                                                                                                                                                                                                                                                                                                                                                                                                                                                                                                        |                                                                                                                                                                                                                                                                                                                                                                   |         |   |  |   |
|----------------|----------------------------------------------------|-------------------------------------------------------------------------------|------------------------------------------------------------------------------------------------------------------------------------------------------------------------------------------------------------------------------------------------------------------------------------------------------------------------------------------------------------------------------------------------------------------------------------------------------------------------------------------------------------------------|-------------------------------------------------------------------------------------------------------------------------------------------------------------------------------------------------------------------------------------------------------------------------------------------------------------------------------------------------------------------|---------|---|--|---|
| Du<br>(2017)   | Total<br>Glycosides of<br>Paeoniae<br>Alba capsule | Commerci<br>al supplier<br>Ningbo<br>Lihua<br>Pharmaceu<br>tical Co.,<br>LTD. | <i>Paeonia lactiflora</i>                                                                                                                                                                                                                                                                                                                                                                                                                                                                                              | <i>Paeonia lactiflora</i><br>Pall.<br>[Paeoniaceae](Paeoni<br>a lactiflora Alba)                                                                                                                                                                                                                                                                                  | Capsule | N |  | N |
| Feng<br>(2017) | Yinxiping pill                                     | Prepared<br>by<br>Researcher<br>s                                             | <i>Rehmanniae radix</i><br><i>recens</i> ,<br><i>Hedyotidis herba</i> ,<br><i>Scutellariae</i><br><i>barbatae herba</i> ,<br><i>Isatidis folium</i> ,<br><i>Paeoniae radix</i><br><i>rubra</i> , <i>Moutan</i><br><i>radicis cortex</i> ,<br><i>Salviae</i><br><i>miltiorrhizae</i><br><i>radix</i> ,<br><i>Lithospermi</i><br><i>radix</i> , <i>Ligustri</i><br><i>fructus</i> , <i>Ecliptae</i><br><i>herba</i> , <i>Liriopis</i><br><i>seu ophiopogonis</i><br><i>tuber</i> , <i>Dioscoreae</i><br><i>rhizoma</i> , | <i>Rehmannia glutinosa</i><br>(Gaertn.) DC.<br>[Orobanchaceae](Reh<br>manniae Radix<br>Recens),<br>Scleromitron<br>diffusum (Willd.)<br>R.J.Wang<br>[Rubiaceae],<br>Scutellaria barbata<br>D.Don [Lamiaceae],<br>Isatis tinctoria subsp.<br>tinctoria<br>[Brassicaceae],<br>Paeonia anomala<br>subsp. veitchii<br>(Lynch) D.Y.Hong &<br>K.Y.Pan<br>[Paeoniaceae], | Pill    | N |  | N |

|                |                    |                         |                                                                                            |                                                                                                                                                                                                                                                                                                                                                                                                                                                                                                       |         |   |   |  |
|----------------|--------------------|-------------------------|--------------------------------------------------------------------------------------------|-------------------------------------------------------------------------------------------------------------------------------------------------------------------------------------------------------------------------------------------------------------------------------------------------------------------------------------------------------------------------------------------------------------------------------------------------------------------------------------------------------|---------|---|---|--|
|                |                    |                         | <i>Dictamni radice</i><br><i>cortex,</i><br><i>Glycyrrhizae</i><br><i>radix et rhizoma</i> | Paeonia × suffruticosa<br>Andrews<br>[Paeoniaceae], Salvia<br>miltiorrhiza Bunge<br>[Lamiaceae], Arnebia<br>euchroma (Royle ex<br>Benth.) I.M.Johnst.<br>[Boraginaceae],<br>Ligustrum lucidum<br>W.T.Aiton [Oleaceae],<br>Eclipta prostrata (L.)<br>L. [Asteraceae],<br>Ophiopogon<br>japonicus (Thunb.)<br>Ker Gawl.<br>[Asparagaceae],<br>Dioscorea japonica<br>Thunb.<br>[Dioscoreaceae],<br>Dictamnus<br>dasycarpus Turcz.<br>[Rutaceae],<br>Glycyrrhiza uralensis<br>Fisch. ex DC.<br>[Fabaceae] |         |   |   |  |
| Han<br>(2017a) | Xiaoyin<br>granule | Commerci<br>al supplier | <i>Rehmanniae radix</i><br><i>recens, Moutan</i>                                           | Rehmannia glutinosa<br>(Gaertn.) DC.                                                                                                                                                                                                                                                                                                                                                                                                                                                                  | Granule | N | N |  |

---

|                                                       |                           |                      |
|-------------------------------------------------------|---------------------------|----------------------|
| Shaanxi<br>Kanghui<br>Pharmaceu<br>tical Co.,<br>Ltd. | <i>radicis cortex,</i>    | [Orobanchaceae](Reh  |
|                                                       | <i>Paeoniae radix</i>     | manniae Radix        |
|                                                       | <i>rubra, Angelicae</i>   | Recens), Paeonia ×   |
|                                                       | <i>sinensis radix,</i>    | suffruticosa Andrews |
|                                                       | <i>Sophorae radix,</i>    | [Paeoniaceae],       |
|                                                       | <i>Lonicerae flos,</i>    | Paeonia anomala      |
|                                                       | <i>Scrophulariae</i>      | subsp. veitchii      |
|                                                       | <i>radix, Arctii</i>      | (Lynch) D.Y.Hong &   |
|                                                       | <i>fructus, Cicadidae</i> | K.Y.Pan              |
|                                                       | <i>periostracum,</i>      | [Paeoniaceae],       |
|                                                       | <i>Dictamni radicis</i>   | Angelica sinensis    |
|                                                       | <i>cortex, Isatidis</i>   | (Oliv.) Diels        |
|                                                       | <i>folium, Carthami</i>   | [Apiaceae], Sophora  |
|                                                       | <i>flos,</i>              | flavescens Aiton     |
|                                                       | <i>Saposhnikoviae</i>     | [Fabaceae], Lonicera |
|                                                       | <i>radix</i>              | japonica Thunb.      |
|                                                       |                           | [Caprifoliaceae],    |
|                                                       |                           | Scrophularia         |
|                                                       |                           | ningpoensis Hemsl.   |
|                                                       |                           | [Scrophulariaceae],  |
|                                                       |                           | Arctium lappa L.     |
|                                                       |                           | [Asteraceae],        |
|                                                       |                           | Cryptotympana        |
|                                                       |                           | dubia (Haupt)        |
|                                                       |                           | [Cicadidae],         |
|                                                       |                           | Dictamnus            |
|                                                       |                           | dasycarpus Turcz.    |

---



|             |                          |                                                               |                                                                                                                                                                                                                                                                                                                                     |                                                                                                                                                                                                                                                                                                                |         |   |   |
|-------------|--------------------------|---------------------------------------------------------------|-------------------------------------------------------------------------------------------------------------------------------------------------------------------------------------------------------------------------------------------------------------------------------------------------------------------------------------|----------------------------------------------------------------------------------------------------------------------------------------------------------------------------------------------------------------------------------------------------------------------------------------------------------------|---------|---|---|
|             |                          |                                                               |                                                                                                                                                                                                                                                                                                                                     | [Rutaceae], Isatis tinctoria subsp. tinctoria                                                                                                                                                                                                                                                                  |         |   |   |
|             |                          |                                                               |                                                                                                                                                                                                                                                                                                                                     | [Brassicaceae], Carthamus tinctorius L. [Asteraceae], Saposhnikovia divaricata (Turcz. ex Ledeb.) Schischk. [Apiaceae]                                                                                                                                                                                         |         |   |   |
| Han (2017b) | Compound Qingdai capsule | Commercial supplier Shaanxi Tianning Pharmaceutical Co., Ltd. | <i>Indigo pulverata levis</i> , <i>Mume fructus</i> , <i>Taraxaci herba</i> , <i>Lithospermi radix</i> , <i>Angelicae dahuricae radix</i> , <i>Salviae miltiorrhizae Radix</i> , <i>Dictamni radicis cortex</i> , <i>Massa medicata fermentata</i> , <i>Dryopteridis crassirhizomatis rhizoma</i> , <i>Smilax glabrae rhizoma</i> , | Persicaria tinctoria (Aiton) Spach<br>[Polygonaceae],<br>Prunus mume (Siebold) Siebold & Zucc. [Rosaceae],<br>Taraxacum mongolicum Hand.-Mazz. [Asteraceae],<br>Arnebia euchroma (Royle ex Benth.) I.M.Johnst.<br>[Boraginaceae],<br>Angelica dahurica (Hoffm.) Benth. & Hook.f. ex Franch. & Sav. [Apiaceae], | Capsule | N | N |

|              |                          |                              |                                                                                                                                        |                                                                                                                                                                                                                                                                                                                                                                                                                                                                                                    |           |   |   |  |
|--------------|--------------------------|------------------------------|----------------------------------------------------------------------------------------------------------------------------------------|----------------------------------------------------------------------------------------------------------------------------------------------------------------------------------------------------------------------------------------------------------------------------------------------------------------------------------------------------------------------------------------------------------------------------------------------------------------------------------------------------|-----------|---|---|--|
|              |                          |                              | <i>Portulacae herba,</i><br><i>Dioscorea</i><br><i>hypoglauca,</i><br><i>Crataegi fructus,</i><br><i>Schisandrae</i><br><i>fructus</i> | Salvia miltiorrhiza<br>Bunge [Lamiaceae],<br>Dictamnus<br>dasycarpus Turcz.<br>[Rutaceae], Massa<br>Medicata Fermentata,<br>Dryopteris<br>crassirhizoma Nakai<br>[Polypodiaceae],<br>Smilax glabra Roxb.<br>[Smilacaceae],<br>Portulaca oleracea L.<br>[Portulacaceae],<br>Dioscorea collettii<br>var. hypoglauca<br>(Palib.) S.J.Pei &<br>C.T.Ting<br>[Dioscoreaceae],<br>Crataegus pinnatifida<br>var. pinnatifida<br>[Rosaceae],<br>Schisandra chinensis<br>(Turcz.) Baill.<br>[Schisandraceae] |           |   |   |  |
| Li<br>(2017) | Qingrejiedu<br>decoction | Prepared<br>by<br>Researcher | <i>Smilax glabrae</i><br><i>rhizoma,</i><br><i>Rehmanniae radix</i>                                                                    | Smilax glabra Roxb.<br>[Smilacaceae],<br>Rehmannia glutinosa                                                                                                                                                                                                                                                                                                                                                                                                                                       | Decoction | N | N |  |

---

|   |                            |                         |
|---|----------------------------|-------------------------|
| s | <i>recens</i> ,            | (Gaertn.) DC.           |
|   | <i>Scrophulariae</i>       | [Orobanchaceae](Reh     |
|   | <i>radix, Isatidis</i>     | manniae Radix           |
|   | <i>folium, Isatidis</i>    | Recens), Scrophularia   |
|   | <i>radix, Scutellariae</i> | ningpoensis Hemsl.      |
|   | <i>radix, Lonicerae</i>    | [Scrophulariaceae],     |
|   | <i>flos, Forsythiae</i>    | Isatis tinctoria subsp. |
|   | <i>fructus</i> ,           | tinctoria               |
|   | <i>Carthami flos,</i>      | [Brassicaceae], Isatis  |
|   | <i>Sophorae flos,</i>      | tinctoria subsp.        |
|   | <i>Moutan radiceis</i>     | tinctoria               |
|   | <i>cortex, Angelicae</i>   | [Brassicaceae](Isatidis |
|   | <i>sinensis radix,</i>     | Radix), Scutellaria     |
|   | <i>Liriopsis seu</i>       | baicalensis Georgi      |
|   | <i>ophiopogonis</i>        | [Lamiaceae], Lonicera   |
|   | <i>tuber,</i>              | japonica Thunb.         |
|   | <i>Glycyrrhizae</i>        | [Caprifoliaceae],       |
|   | <i>radix et rhizoma</i>    | Forsythia suspensa      |
|   |                            | (Thunb.) Vahl           |
|   |                            | [Oleaceae] ,            |
|   |                            | Carthamus tinctorius    |
|   |                            | L. [Asteraceae],        |
|   |                            | Styphnolobium           |
|   |                            | japonicum (L.) Schott   |
|   |                            | [Fabaceae], Paeonia ×   |
|   |                            | suffruticosa Andrews    |
|   |                            | [Paeoniaceae],          |

---

|                |                          |                                                                                                   |                                                                                            |                                                                                                                                                                                               |         |   |   |
|----------------|--------------------------|---------------------------------------------------------------------------------------------------|--------------------------------------------------------------------------------------------|-----------------------------------------------------------------------------------------------------------------------------------------------------------------------------------------------|---------|---|---|
|                |                          |                                                                                                   |                                                                                            | <p>Angelica sinensis<br/>(Oliv.) Diels<br/>[Apiaceae],<br/>Ophiopogon<br/>japonicus (Thunb.)<br/>Ker Gawl.<br/>[Asparagaceae],<br/>Glycyrrhiza uralensis<br/>Fisch. ex DC.<br/>[Fabaceae]</p> |         |   |   |
| Liu<br>(2017)  | Yinxie<br>capsule        | <p>Commercial supplier<br/>Xinjiang<br/>Wei-A-<br/>Tang<br/>Pharmaceu<br/>tical Co.,<br/>Ltd.</p> | <p><i>Smilax glabrae</i><br/><i>rhizoma</i>, <i>Smilacis</i><br/><i>chinae rhizoma</i></p> | <p>Smilax glabra Roxb.<br/>[Smilacaceae], Smilax<br/>china L.<br/>[Smilacaceae]</p>                                                                                                           | Capsule | N | N |
| Luo<br>(2017)  | Compound<br>glycyrrhizin | <p>Commercial supplier<br/>Henan Xin<br/>Shuaike<br/>Pharmaceu<br/>tical Co.,<br/>LTD.</p>        | <p><i>Glycyrrhizae</i><br/><i>radix et rhizoma</i></p>                                     | <p>Glycyrrhiza uralensis<br/>Fisch. ex DC.<br/>[Fabaceae]</p>                                                                                                                                 | Tablet  | N | N |
| Pang<br>(2017) | Compound<br>Qingdai      | <p>Commercial supplier</p>                                                                        | <p><i>Indigo pulverata</i><br/><i>levis</i>, <i>Mume</i></p>                               | <p>Persicaria tinctoria<br/>(Aiton) Spach</p>                                                                                                                                                 | Capsule | N | N |

|         |                                                                                                   |                                                                                                                                                                                                                                                                                                                                                                                                                                                                                                                     |                                                                                                                                                                                                                                                                                                                                                                                                                                                                                                                                                             |
|---------|---------------------------------------------------------------------------------------------------|---------------------------------------------------------------------------------------------------------------------------------------------------------------------------------------------------------------------------------------------------------------------------------------------------------------------------------------------------------------------------------------------------------------------------------------------------------------------------------------------------------------------|-------------------------------------------------------------------------------------------------------------------------------------------------------------------------------------------------------------------------------------------------------------------------------------------------------------------------------------------------------------------------------------------------------------------------------------------------------------------------------------------------------------------------------------------------------------|
| capsule | Shaanxi<br>Pharmaceu<br>tical<br>Holdings<br>Group<br>Tianning<br>Pharmaceu<br>tical Co.,<br>LTD. | <i>fructus, Taraxaci</i><br><i>herba,</i><br><i>Lithospermi</i><br><i>radix, Angelicae</i><br><i>dahuricae radix,</i><br><i>Salviae</i><br><i>miltiorrhizae</i><br><i>radix, Dictamni</i><br><i>radicis cortex,</i><br><i>Massa medicata</i><br><i>fermentata,</i><br><i>Dryopteridis</i><br><i>crassirhizomatis</i><br><i>rhizoma, Smilax</i><br><i>glabrae rhizoma,</i><br><i>Portulacae herba,</i><br><i>Dioscorea</i><br><i>hypoglauca,</i><br><i>Crataegi fructus,</i><br><i>Schisandrae</i><br><i>fructus</i> | [Polygonaceae],<br>Prunus mume<br>(Siebold) Siebold &<br>Zucc. [Rosaceae],<br>Taraxacum<br>mongolicum Hand.-<br>Mazz. [Asteraceae],<br>Arnebia euchroma<br>(Royle ex Benth.)<br>I.M.Johnst.<br>[Boraginaceae],<br>Angelica dahurica<br>(Hoffm.) Benth. &<br>Hook.f. ex Franch. &<br>Sav. [Apiaceae],<br>Salvia miltiorrhiza<br>Bunge [Lamiaceae],<br>Dictamnus<br>dasycarpus Turcz.<br>[Rutaceae], Massa<br>Medicata Fermentata,<br>Dryopteris<br>crassirhizoma Nakai<br>[Polypodiaceae],<br>Smilax glabra Roxb.<br>[Smilacaceae],<br>Portulaca oleracea L. |
|---------|---------------------------------------------------------------------------------------------------|---------------------------------------------------------------------------------------------------------------------------------------------------------------------------------------------------------------------------------------------------------------------------------------------------------------------------------------------------------------------------------------------------------------------------------------------------------------------------------------------------------------------|-------------------------------------------------------------------------------------------------------------------------------------------------------------------------------------------------------------------------------------------------------------------------------------------------------------------------------------------------------------------------------------------------------------------------------------------------------------------------------------------------------------------------------------------------------------|

|               |                                   |                                   |                                                                                                                                                                                                                                                                                                                                                |                                                                                                                                                                                                                                                                                                               |           |   |   |
|---------------|-----------------------------------|-----------------------------------|------------------------------------------------------------------------------------------------------------------------------------------------------------------------------------------------------------------------------------------------------------------------------------------------------------------------------------------------|---------------------------------------------------------------------------------------------------------------------------------------------------------------------------------------------------------------------------------------------------------------------------------------------------------------|-----------|---|---|
|               |                                   |                                   |                                                                                                                                                                                                                                                                                                                                                | [Portulacaceae],<br>Dioscorea collettii<br>var. hypoglauca<br>(Palib.) S.J.Pei &<br>C.T.Ting<br>[Dioscoreaceae],<br>Crataegus pinnatifida<br>var. pinnatifida<br>[Rosaceae],<br>Schisandra chinensis<br>(Turcz.) Baill.<br>[Schisandraceae]                                                                   |           |   |   |
| Shi<br>(2017) | Liangxuexiao<br>feng<br>decoction | Prepared<br>by<br>Researcher<br>s | <i>Rehmanniae radix</i><br><i>recens, Paeonia</i><br><i>lactiflora,</i><br><i>Scrophulariae</i><br><i>radix,</i><br><i>Anemarrhenae</i><br><i>rhizoma, Gypsum</i><br><i>fibrosum,</i><br><i>Imperatae</i><br><i>rhizoma,</i><br><i>Saposhnikoviae</i><br><i>radix,</i><br><i>Schizonepetae</i><br><i>spica, Cimicifugae</i><br><i>rhizoma,</i> | Rehmannia glutinosa<br>(Gaertn.) DC.<br>[Orobanchaceae](Reh<br>manniae Radix<br>Recens), Paeonia<br>lactiflora Pall.<br>[Paeoniaceae](Paeoni<br>a lactiflora Alba),<br>Scrophularia<br>ningpoensis Hemsl.<br>[Scrophulariaceae],<br>Anemarrhena<br>asphodeloides Bunge<br>[Asparagaceae],<br>Gypsum Fibrosum, | Decoction | N | N |

|                |                              |                                   |                                                                                                                                                                           |                                                                                                                                                                                                                                                                                                                                                                                             |           |   |   |
|----------------|------------------------------|-----------------------------------|---------------------------------------------------------------------------------------------------------------------------------------------------------------------------|---------------------------------------------------------------------------------------------------------------------------------------------------------------------------------------------------------------------------------------------------------------------------------------------------------------------------------------------------------------------------------------------|-----------|---|---|
|                |                              |                                   | <i>Glycyrrhizae<br/>radix et rhizoma</i> ,<br><i>Arctii fructus</i> ,<br><i>Lonicerae flos</i>                                                                            | Imperata cylindrica<br>(L.) Raeusch.<br>[Poaceae],<br>Saposhnikovia<br>divaricata (Turcz. ex<br>Ledeb.) Schischk.<br>[Apiaceae], Nepeta<br>tenuifolia Benth.<br>[Lamiaceae], Actaea<br>heracleifolia (Kom.)<br>J.Compton<br>[Ranunculaceae],<br>Glycyrrhiza uralensis<br>Fisch. ex DC.<br>[Fabaceae] . Arctium<br>lappa L. [Asteraceae],<br>Lonicera japonica<br>Thunb.<br>[Caprifoliaceae] |           |   |   |
| Song<br>(2017) | Yangxuetongl<br>uo decoction | Prepared<br>by<br>Researcher<br>s | <i>Smilax glabrae<br/>rhizoma</i> ,<br><i>Sophorae flos</i> ,<br><i>Angelicae<br/>sinensis radix</i> ,<br><i>Spatholobi caulis</i> ,<br><i>Saposhnikoviae<br/>radix</i> , | Smilax glabra Roxb.<br>[Smilacaceae],<br>Styphnolobium<br>japonicum (L.) Schott<br>[Fabaceae], Angelica<br>sinensis (Oliv.) Diels<br>[Apiaceae],<br>Spatholobus                                                                                                                                                                                                                             | Decoction | N | N |

|             |                          |                                                                  |                                                                              |                                                                                                                                                                                                                                  |           |   |   |
|-------------|--------------------------|------------------------------------------------------------------|------------------------------------------------------------------------------|----------------------------------------------------------------------------------------------------------------------------------------------------------------------------------------------------------------------------------|-----------|---|---|
|             |                          |                                                                  | <i>Rehmanniae radix recens, Liriopis seu ophiopogonis tuber</i>              | suberectus Dunn [Fabaceae], Saposhnikovia divaricata (Turcz. ex Ledeb.) Schischk. [Apiaceae], Rehmannia glutinosa (Gaertn.) DC. [Orobanchaceae](Rehmanniae Radix Recens), Ophiopogon japonicus (Thunb.) Ker Gawl. [Asparagaceae] |           |   |   |
| Wang (2017) | Yinxie capsule           | Commercial supplier Xinjiang Wei-A-Tang Pharmaceutical Co., Ltd. | <i>Smilax glabrae rhizoma, Smilacis chinae rhizoma</i>                       | Smilax glabra Roxb. [Smilacaceae], Smilax china L. [Smilacaceae]                                                                                                                                                                 | Capsule   | N | N |
| Wu (2017)   | Shentongzhu yu decoction | Prepared by Researchers                                          | <i>Persicae semen, Carthami flos, Cnidii rhizoma, Gentianae macrophyllae</i> | Prunus persica (L.) Batsch [Rosaceae], Carthamus tinctorius L. [Asteraceae], Conioselinum                                                                                                                                        | Decoction | N | N |



---

|                          |                              |
|--------------------------|------------------------------|
| <i>radix, Osterici</i>   | anthriscoides                |
| <i>seu notopterygii</i>  | ‘Chuanxiong’                 |
| <i>radix et rhizoma,</i> | [Apiaceae], <i>Gentiana</i>  |
| <i>Achyranthis</i>       | <i>macrophylla</i> Pall.     |
| <i>radix, Lumbricus,</i> | [Gentianaceae],              |
| <i>Angelicae</i>         | <i>Hansenia</i>              |
| <i>sinensis radix,</i>   | <i>weberbaueriana</i>        |
| <i>Commiphora</i>        | (Fedde ex H.Wolff)           |
| <i>myrrha,</i>           | Pimenov & Kljuykov           |
| <i>Trogopterorum</i>     | [Apiaceae],                  |
| <i>faeces, Cyperi</i>    | <i>Achyranthes</i>           |
| <i>rhizoma,</i>          | <i>bidentata</i> Blume       |
| <i>Glycyrrhizae</i>      | [Amaranthaceae],             |
| <i>radix et rhizoma</i>  | <i>Pericaeta</i>             |
|                          | <i>communisma</i> Gate et    |
|                          | Hatai [Lumbricidae],         |
|                          | <i>Angelica sinensis</i>     |
|                          | (Oliv.) Diels                |
|                          | [Apiaceae],                  |
|                          | <i>Commiphora myrrha</i>     |
|                          | (T.Nees) Engl.               |
|                          | [Burseraceae],               |
|                          | <i>Trogopterorum</i>         |
|                          | <i>Faeces, Cyperus</i>       |
|                          | <i>rotundus</i> L.           |
|                          | [Cyperaceae],                |
|                          | <i>Glycyrrhiza uralensis</i> |

---

|                |                    |                                                                       |                                                                                                                                                                                                                                                                                                                                                       |                                                                                                                                                                                                                                                                                                                                                                                                                                                                                                           |         |   |   |
|----------------|--------------------|-----------------------------------------------------------------------|-------------------------------------------------------------------------------------------------------------------------------------------------------------------------------------------------------------------------------------------------------------------------------------------------------------------------------------------------------|-----------------------------------------------------------------------------------------------------------------------------------------------------------------------------------------------------------------------------------------------------------------------------------------------------------------------------------------------------------------------------------------------------------------------------------------------------------------------------------------------------------|---------|---|---|
|                |                    |                                                                       |                                                                                                                                                                                                                                                                                                                                                       | Fisch. ex DC.<br>[Fabaceae]                                                                                                                                                                                                                                                                                                                                                                                                                                                                               |         |   |   |
| Yang<br>(2017) | Xiaoyin<br>granule | Commercial supplier<br>Shaanxi Kanghui<br>Pharmaceutical Co.,<br>Ltd. | <i>Rehmanniae radix<br/>recens, Moutan<br/>radicis cortex,<br/>Paeoniae radix<br/>rubra, Angelicae<br/>sinensis radix,<br/>Sophorae radix,<br/>Lonicerae flos,<br/>Scrophulariae<br/>radix, Arctii<br/>fructus, Cicadidae<br/>periostracum,<br/>Dictamni radicis<br/>cortex, Isatidis<br/>folium, Carthami<br/>flos,<br/>Saposhnikoviae<br/>radix</i> | Rehmannia glutinosa<br>(Gaertn.) DC.<br>[Orobanchaceae](Reh<br>manniae Radix<br>Recens), Paeonia ×<br>suffruticosa Andrews<br>[Paeoniaceae],<br>Paeonia anomala<br>subsp. veitchii<br>(Lynch) D.Y.Hong &<br>K.Y.Pan<br>[Paeoniaceae],<br>Angelica sinensis<br>(Oliv.) Diels<br>[Apiaceae], Sophora<br>flavescens Aiton<br>[Fabaceae], Lonicera<br>japonica Thunb.<br>[Caprifoliaceae],<br>Scrophularia<br>ningpoensis Hemsl.<br>[Scrophulariaceae],<br>Arctium lappa L.<br>[Asteraceae],<br>Cryptotympana | Granule | N | N |

|                  |                            |                                                             |                                                                                                                            |                                                                                                                                                                                                                                                                    |           |   |   |
|------------------|----------------------------|-------------------------------------------------------------|----------------------------------------------------------------------------------------------------------------------------|--------------------------------------------------------------------------------------------------------------------------------------------------------------------------------------------------------------------------------------------------------------------|-----------|---|---|
|                  |                            |                                                             |                                                                                                                            | dubia (Haupt)<br>[Cicadidae],<br>Dictamnus<br>dasycarpus Turcz.<br>[Rutaceae], Isatis<br>tinctoria subsp.<br>tinctoria<br>[Brassicaceae],<br>Carthamus tinctorius<br>L. [Asteraceae],<br>Saposhnikovia<br>divaricata (Turcz. ex<br>Ledeb.) Schischk.<br>[Apiaceae] |           |   |   |
| Zeng<br>(2017)   | Compound<br>glycyrrhizin   | Commercial supplier<br>Beijing Kain<br>Technology Co., Ltd. | <i>Glycyrrhizae<br/>radix et rhizoma</i>                                                                                   | Glycyrrhiza uralensis<br>Fisch. ex DC.<br>[Fabaceae]                                                                                                                                                                                                               | Capsule   | N | N |
| Zhang<br>(2017a) | Taohongershao<br>decoction | Prepared<br>by<br>Researchers                               | <i>Persicae semen,<br/>Carthami flos,<br/>Paeoniae radix<br/>rubra, Paeonia<br/>lactiflora,<br/>Sparganii<br/>rhizoma,</i> | Prunus persica (L.)<br>Batsch [Rosaceae],<br>Carthamus tinctorius<br>L. [Asteraceae],<br>Paeonia anomala<br>subsp. veitchii<br>(Lynch) D.Y.Hong &                                                                                                                  | Decoction | N | N |

---

|                           |                        |
|---------------------------|------------------------|
| <i>Curcumae</i>           | K.Y.Pan                |
| <i>rhizoma, Salviae</i>   | [Paeoniaceae],         |
| <i>miltiorrhizae</i>      | Paeonia lactiflora     |
| <i>radix, Cnidii</i>      | Pall.                  |
| <i>rhizoma,</i>           | [Paeoniaceae](Paeoni   |
| <i>Euonymi ramuli</i>     | a lactiflora Alba),    |
| <i>suberalatum, Rhei</i>  | Sparganium             |
| <i>radix et rhizoma,</i>  | stoloniferum (Buch.-   |
| <i>Spatholobi caulis,</i> | Ham. ex Graebn.)       |
| <i>Rehmanniae radix</i>   | Buch.-Ham. ex Juz.     |
| <i>recens, Sophorae</i>   | [Typhaceae],           |
| <i>flos, Glycyrrhizae</i> | Curcuma phaeocaulis    |
| <i>radix et rhizoma</i>   | Valeton                |
|                           | [Zingiberaceae],       |
|                           | Salvia miltiorrhiza    |
|                           | Bunge [Lamiaceae],     |
|                           | Conioselinum           |
|                           | anthriscoides          |
|                           | ‘Chuanxiong’           |
|                           | [Apiaceae],            |
|                           | Euonymus alatus        |
|                           | (Thunb.) Siebold       |
|                           | [Celastraceae],        |
|                           | Rheum officinale       |
|                           | Baill. [Polygonaceae], |
|                           | Spatholobus            |
|                           | suberectus Dunn        |

---

|                  |                             |                                   |                                                                                                                                                                                                                                                                                                                                                                  |                                                                                                                                                                                                                                                                                                    |           |   |   |
|------------------|-----------------------------|-----------------------------------|------------------------------------------------------------------------------------------------------------------------------------------------------------------------------------------------------------------------------------------------------------------------------------------------------------------------------------------------------------------|----------------------------------------------------------------------------------------------------------------------------------------------------------------------------------------------------------------------------------------------------------------------------------------------------|-----------|---|---|
|                  |                             |                                   |                                                                                                                                                                                                                                                                                                                                                                  | [Fabaceae],<br>Rehmannia glutinosa<br>(Gaertn.) DC.<br>[Orobanchaceae](Reh<br>manniae Radix<br>Recens),<br>Styphnolobium<br>japonicum (L.) Schott<br>[Fabaceae],<br>Glycyrrhiza uralensis<br>Fisch. ex DC.<br>[Fabaceae]                                                                           |           |   |   |
| Zhang<br>(2017b) | Taohongersh<br>ao decoction | Prepared<br>by<br>Researcher<br>s | <i>Persicae semen,</i><br><i>Carthami flos,</i><br><i>Paeoniae radix</i><br><i>rubra, Paeonia</i><br><i>lactiflora,</i><br><i>Sparganii</i><br><i>rhizoma,</i><br><i>Curcumae</i><br><i>rhizoma, Salviae</i><br><i>miltiorrhizae</i><br><i>radix, Cnidii</i><br><i>rhizoma,</i><br><i>Euonymi ramuli</i><br><i>suberalatum, Rhei</i><br><i>radix et rhizoma,</i> | Prunus persica (L.)<br>Batsch [Rosaceae],<br>Carthamus tinctorius<br>L. [Asteraceae],<br>Paeonia anomala<br>subsp. veitchii<br>(Lynch) D.Y.Hong &<br>K.Y.Pan<br>[Paeoniaceae],<br>Paeonia lactiflora<br>Pall.<br>[Paeoniaceae](Paeoni<br>a lactiflora Alba),<br>Sparganium<br>stoloniferum (Buch.- | Decoction | N | N |

---

|                            |                        |
|----------------------------|------------------------|
| <i>Spatholobi caulis</i> , | Ham. ex Graebn.)       |
| <i>Rehmanniae radix</i>    | Buch.-Ham. ex Juz.     |
| <i>recens, Sophorae</i>    | [Typhaceae],           |
| <i>flos, Glycyrrhizae</i>  | Curcuma phaeocaulis    |
| <i>radix et rhizoma</i>    | Valeton                |
|                            | [Zingiberaceae],       |
|                            | Salvia miltiorrhiza    |
|                            | Bunge [Lamiaceae],     |
|                            | Conioselinum           |
|                            | anthriscoides          |
|                            | ‘Chuanxiong’           |
|                            | [Apiaceae],            |
|                            | Euonymus alatus        |
|                            | (Thunb.) Siebold       |
|                            | [Celastraceae],        |
|                            | Rheum officinale       |
|                            | Baill. [Polygonaceae], |
|                            | Spatholobus            |
|                            | suberectus Dunn        |
|                            | [Fabaceae],            |
|                            | Rehmannia glutinosa    |
|                            | (Gaertn.) DC.          |
|                            | [Orobanchaceae](Reh    |
|                            | manniae Radix          |
|                            | Recens),               |
|                            | Styphnolobium          |
|                            | japonicum (L.) Schott  |

---

|                  |                           |                               |                                                                                                                                                                                                                                                                                                                                                                                                                                                                                                             |                                                                                                                                                                                                                                                                                                                                                                                                                                                                |           |   |   |
|------------------|---------------------------|-------------------------------|-------------------------------------------------------------------------------------------------------------------------------------------------------------------------------------------------------------------------------------------------------------------------------------------------------------------------------------------------------------------------------------------------------------------------------------------------------------------------------------------------------------|----------------------------------------------------------------------------------------------------------------------------------------------------------------------------------------------------------------------------------------------------------------------------------------------------------------------------------------------------------------------------------------------------------------------------------------------------------------|-----------|---|---|
|                  |                           |                               |                                                                                                                                                                                                                                                                                                                                                                                                                                                                                                             | [Fabaceae],<br>Glycyrrhiza uralensis<br>Fisch. ex DC.                                                                                                                                                                                                                                                                                                                                                                                                          |           |   |   |
|                  |                           |                               |                                                                                                                                                                                                                                                                                                                                                                                                                                                                                                             | [Fabaceae]                                                                                                                                                                                                                                                                                                                                                                                                                                                     |           |   |   |
| Zhang<br>(2017c) | Taohongersha<br>decoction | Prepared<br>by<br>Researchers | <i>Persicae semen,</i><br><i>Carthami flos,</i><br><i>Paeoniae radix</i><br><i>rubra, Paeonia</i><br><i>lactiflora,</i><br><i>Sparganii</i><br><i>rhizoma,</i><br><i>Curcumae</i><br><i>rhizoma, Salviae</i><br><i>miltiorrhizae</i><br><i>radix, Cnidii</i><br><i>rhizoma,</i><br><i>Euonymi ramuli</i><br><i>suberalatum, Rhei</i><br><i>radix et rhizoma,</i><br><i>Spatholobi caulis,</i><br><i>Rehmanniae radix</i><br><i>recens, Sophorae</i><br><i>flos, Glycyrrhizae</i><br><i>radix et rhizoma</i> | Prunus persica (L.)<br>Batsch [Rosaceae],<br>Carthamus tinctorius<br>L. [Asteraceae],<br>Paeonia anomala<br>subsp. veitchii<br>(Lynch) D.Y.Hong &<br>K.Y.Pan<br>[Paeoniaceae],<br>Paeonia lactiflora<br>Pall.<br>[Paeoniaceae](Paeonia<br>lactiflora Alba),<br>Sparganium<br>stoloniferum (Buch.-<br>Ham. ex Graebn.)<br>Buch.-Ham. ex Juz.<br>[Typhaceae],<br>Curcuma phaeocaulis<br>Valeton<br>[Zingiberaceae],<br>Salvia miltiorrhiza<br>Bunge [Lamiaceae], | Decoction | N | N |

|                  |                      |                                   |                                                                                                           |                                                                                                                                                                                                                                                                                                                                                                                                                                    |         |   |   |
|------------------|----------------------|-----------------------------------|-----------------------------------------------------------------------------------------------------------|------------------------------------------------------------------------------------------------------------------------------------------------------------------------------------------------------------------------------------------------------------------------------------------------------------------------------------------------------------------------------------------------------------------------------------|---------|---|---|
|                  |                      |                                   |                                                                                                           | Conioselinum<br>anthriscoides<br>‘Chuanxiong’<br>[Apiaceae],<br>Euonymus alatus<br>(Thunb.) Siebold<br>[Celastraceae],<br>Rheum officinale<br>Baill. [Polygonaceae],<br>Spatholobus<br>suberectus Dunn<br>[Fabaceae],<br>Rehmannia glutinosa<br>(Gaertn.) DC.<br>[Orobanchaceae](Reh<br>manniae Radix<br>Recens),<br>Styphnolobium<br>japonicum (L.) Schott<br>[Fabaceae],<br>Glycyrrhiza uralensis<br>Fisch. ex DC.<br>[Fabaceae] |         |   |   |
| Zhang<br>(2017d) | Liangxuexiao<br>feng | Prepared<br>by<br>Researcher<br>s | <i>Rehmanniae radix</i><br><i>recens</i> , <i>Gypsum</i><br><i>fibrosum</i> ,<br><i>Bubalus bubalis</i> , | Rehmannia glutinosa<br>(Gaertn.) DC.<br>[Orobanchaceae](Reh<br>manniae Radix                                                                                                                                                                                                                                                                                                                                                       | Granule | N | N |



---

|                         |                       |
|-------------------------|-----------------------|
| <i>Scrophulariae</i>    | Recens), Gypsum       |
| <i>radix, Imperatae</i> | Fibrosum, Bubalus     |
| <i>rhizoma, Paeonia</i> | bubalis Linné         |
| <i>lactiflora,</i>      | [Bovidae],            |
| <i>Anemarrhenae</i>     | Scrophularia          |
| <i>rhizoma,</i>         | ningpoensis Hemsl.    |
| <i>Lonicerae flos,</i>  | [Scrophulariaceae],   |
| <i>Arctii fructus,</i>  | Imperata cylindrica   |
| <i>Schizonepetae</i>    | (L.) Raeusch.         |
| <i>spica,</i>           | [Poaceae], Paeonia    |
| <i>Saposhnikoviae</i>   | lactiflora Pall.      |
| <i>radix</i>            | [Paeoniaceae](Paeoni  |
|                         | a lactiflora Alba),   |
|                         | Anemarrhena           |
|                         | asphodeloides Bunge   |
|                         | [Asparagaceae],       |
|                         | Lonicera japonica     |
|                         | Thunb.                |
|                         | [Caprifoliaceae],     |
|                         | Arctium lappa L.      |
|                         | [Asteraceae], Nepeta  |
|                         | tenuifolia Benth.     |
|                         | [Lamiaceae],          |
|                         | Saposhnikovia         |
|                         | divaricata (Turcz. ex |
|                         | Ledeb.) Schischk.     |
|                         | [Apiaceae]            |

---

|                  |                             |                                   |                                                                                                                                                                                                                                                                                                                                                                                                                                                                                                             |                                                                                                                                                                                                                                                                                                                                                                                                                                                                                                                                 |           |   |   |
|------------------|-----------------------------|-----------------------------------|-------------------------------------------------------------------------------------------------------------------------------------------------------------------------------------------------------------------------------------------------------------------------------------------------------------------------------------------------------------------------------------------------------------------------------------------------------------------------------------------------------------|---------------------------------------------------------------------------------------------------------------------------------------------------------------------------------------------------------------------------------------------------------------------------------------------------------------------------------------------------------------------------------------------------------------------------------------------------------------------------------------------------------------------------------|-----------|---|---|
| Zhang<br>(2017e) | Taohongersh<br>ao decoction | Prepared<br>by<br>Researcher<br>s | <i>Persicae semen,</i><br><i>Carthami flos,</i><br><i>Paeoniae radix</i><br><i>rubra, Paeonia</i><br><i>lactiflora,</i><br><i>Sparganii</i><br><i>rhizoma,</i><br><i>Curcumae</i><br><i>rhizoma, Salviae</i><br><i>miltiorrhizae</i><br><i>radix, Cnidii</i><br><i>rhizoma,</i><br><i>Euonymi ramuli</i><br><i>suberalatum, Rhei</i><br><i>radix et rhizoma,</i><br><i>Spatholobi caulis,</i><br><i>Rehmanniae radix</i><br><i>recens, Sophorae</i><br><i>flos, Glycyrrhizae</i><br><i>radix et rhizoma</i> | Prunus persica (L.)<br>Batsch [Rosaceae],<br>Carthamus tinctorius<br>L. [Asteraceae],<br>Paeonia anomala<br>subsp. veitchii<br>(Lynch) D.Y.Hong &<br>K.Y.Pan<br>[Paeoniaceae],<br>Paeonia lactiflora<br>Pall.<br>[Paeoniaceae](Paeoni<br>a lactiflora Alba),<br>Sparganium<br>stoloniferum (Buch.-<br>Ham. ex Graebn.)<br>Buch.-Ham. ex Juz.<br>[Typhaceae],<br>Curcuma phaeocaulis<br>Valeton<br>[Zingiberaceae],<br>Salvia miltiorrhiza<br>Bunge [Lamiaceae],<br>Conioselinum<br>anthriscoides<br>‘Chuanxiong’<br>[Apiaceae], | Decoction | N | N |
|------------------|-----------------------------|-----------------------------------|-------------------------------------------------------------------------------------------------------------------------------------------------------------------------------------------------------------------------------------------------------------------------------------------------------------------------------------------------------------------------------------------------------------------------------------------------------------------------------------------------------------|---------------------------------------------------------------------------------------------------------------------------------------------------------------------------------------------------------------------------------------------------------------------------------------------------------------------------------------------------------------------------------------------------------------------------------------------------------------------------------------------------------------------------------|-----------|---|---|

|                |                   |                                                                                          |                                                                                    |                                                                                                                                                                                                                                                                                                                                                                                             |         |   |   |
|----------------|-------------------|------------------------------------------------------------------------------------------|------------------------------------------------------------------------------------|---------------------------------------------------------------------------------------------------------------------------------------------------------------------------------------------------------------------------------------------------------------------------------------------------------------------------------------------------------------------------------------------|---------|---|---|
|                |                   |                                                                                          |                                                                                    | <p>Euonymus alatus<br/>(Thunb.) Siebold<br/>[Celastraceae],<br/>Rheum officinale<br/>Baill. [Polygonaceae],<br/>Spatholobus<br/>suberectus Dunn<br/>[Fabaceae],<br/>Rehmannia glutinosa<br/>(Gaertn.) DC.<br/>[Orobanchaceae](Reh<br/>manniae Radix<br/>Recens),<br/>Styphnolobium<br/>japonicum (L.) Schott<br/>[Fabaceae],<br/>Glycyrrhiza uralensis<br/>Fisch. ex DC.<br/>[Fabaceae]</p> |         |   |   |
| Zhao<br>(2017) | Yinxie<br>capsule | Commerci<br>al supplier<br>Xinjiang<br>Wei-A-<br>Tang<br>Pharmaceu<br>tical Co.,<br>Ltd. | <i>Smilax glabrae</i><br><i>rhizoma</i> , <i>Smilacis</i><br><i>chinae rhizoma</i> | Smilax glabra Roxb.<br>[Smilacaceae], Smilax<br>china L.<br>[Smilacaceae]                                                                                                                                                                                                                                                                                                                   | Capsule | N | N |

|                |                      |                                   |                                                                                                                                                                                                                                                                                                                                                                                                                     |                                                                                                                                                                                                                                                                                                                                                                                                                     |           |   |   |
|----------------|----------------------|-----------------------------------|---------------------------------------------------------------------------------------------------------------------------------------------------------------------------------------------------------------------------------------------------------------------------------------------------------------------------------------------------------------------------------------------------------------------|---------------------------------------------------------------------------------------------------------------------------------------------------------------------------------------------------------------------------------------------------------------------------------------------------------------------------------------------------------------------------------------------------------------------|-----------|---|---|
| Chai<br>(2018) | Xiaoyin<br>decoction | Prepared<br>by<br>Researcher<br>s | Salvia miltiorrhiza<br>Bunge [Lamiaceae],<br>Spatholobus<br>suberectus Dunn<br>[Fabaceae],<br>Styphnolobium<br>japonicum (L.) Schott<br>[Fabaceae], Arnebia<br>euchroma (Royle ex<br>Benth.) I.M.Johnst.<br>[Boraginaceae],<br>Rehmanniae radix<br>recens,<br>Rehmanniae radix<br>preparata,<br>Imperatae<br>rhizoma, Moutan<br>radicis cortex,<br>Angelicae<br>sinensis radix,<br>Glycyrrhizae<br>radix et rhizoma | Salvia miltiorrhiza<br>Bunge [Lamiaceae],<br>Spatholobus<br>suberectus Dunn<br>[Fabaceae],<br>Styphnolobium<br>japonicum (L.) Schott<br>[Fabaceae], Arnebia<br>euchroma (Royle ex<br>Benth.) I.M.Johnst.<br>[Boraginaceae],<br>Rehmanniae radix<br>recens,<br>Rehmanniae radix<br>preparata,<br>Imperatae<br>rhizoma, Moutan<br>radicis cortex,<br>Angelicae<br>sinensis radix,<br>Glycyrrhizae<br>radix et rhizoma | Decoction | N | N |
|                |                      |                                   |                                                                                                                                                                                                                                                                                                                                                                                                                     |                                                                                                                                                                                                                                                                                                                                                                                                                     |           |   |   |

|               |                         |                                                                                           |                                                                                                                                                                                                                                                                                                                                   |                                                                                                                                                                                                                                                                                                                       |           |   |   |
|---------------|-------------------------|-------------------------------------------------------------------------------------------|-----------------------------------------------------------------------------------------------------------------------------------------------------------------------------------------------------------------------------------------------------------------------------------------------------------------------------------|-----------------------------------------------------------------------------------------------------------------------------------------------------------------------------------------------------------------------------------------------------------------------------------------------------------------------|-----------|---|---|
|               |                         |                                                                                           |                                                                                                                                                                                                                                                                                                                                   | (Oliv.) Diels<br>[Apiaceae],<br>Glycyrrhiza uralensis<br>Fisch. ex DC.<br>[Fabaceae]                                                                                                                                                                                                                                  |           |   |   |
| Li<br>(2018)  | Yinxie<br>capsule       | Commercial supplier<br>Shaanxi<br>Dongtai<br>Manufacturing<br>Pharmaceutical Co.,<br>Ltd. | <i>Smilax glabrae</i><br><i>rhizoma</i> , <i>Smilacis</i><br><i>chinae rhizoma</i>                                                                                                                                                                                                                                                | <i>Smilax glabra</i> Roxb.<br>[Smilacaceae], <i>Smilax</i><br><i>china</i> L.<br>[Smilacaceae]                                                                                                                                                                                                                        | Capsule   | N | N |
| Liu<br>(2018) | Banzhilian<br>decoction | Prepared<br>by<br>Researchers                                                             | <i>Scutellariae</i><br><i>barbatae herba</i> ,<br><i>Lithospermis</i><br><i>radix</i> , <i>Taraxaci</i><br><i>herba</i> ,<br><i>Chrysanthemi flos</i> ,<br><i>Violae herba</i> ,<br><i>Dioscorea</i><br><i>hypoglauca</i> ,<br><i>Schizonepetae</i><br><i>spica</i> ,<br><i>Saposhnikoviae</i><br><i>radix</i> , <i>Cicadidae</i> | <i>Scutellaria barbata</i><br>D.Don [Lamiaceae],<br><i>Arnebia euchroma</i><br>(Royle ex Benth.)<br>I.M.Johnst.<br>[Boraginaceae],<br><i>Taraxacum</i><br><i>mongolicum</i> Hand.-<br>Mazz. [Asteraceae],<br><i>Chrysanthemum</i> ×<br><i>morifolium</i> (Ramat.)<br>Hemsl. [Asteraceae],<br><i>Viola mandshurica</i> | Decoction | N | N |

|               |                          |                                   |                                                                                                                        |                                                                                                                                                                                                                                                                                                                                                                                                                                                      |           |   |   |
|---------------|--------------------------|-----------------------------------|------------------------------------------------------------------------------------------------------------------------|------------------------------------------------------------------------------------------------------------------------------------------------------------------------------------------------------------------------------------------------------------------------------------------------------------------------------------------------------------------------------------------------------------------------------------------------------|-----------|---|---|
|               |                          |                                   | <i>periostracum</i> ,<br><i>Cnidi fructus</i> ,<br><i>Dictamni radices</i><br><i>cortex, Kochiae</i><br><i>fructus</i> | W.Becker [Violaceae],<br>Dioscorea colletti<br>var. hypoglauc<br>(Palib.) S.J.Pei &<br>C.T.Ting<br>[Dioscoreaceae],<br>Nepeta tenuifolia<br>Benth. [Lamiaceae],<br>Saposhnikovia<br>divaricata (Turcz. ex<br>Ledeb.) Schischk.<br>[Apiaceae],<br>Cryptotympana<br>dubia (Haupt)<br>[Cicadidae], Cnidium<br>monnieri (L.) Cusson<br>[Apiaceae],<br>Dictamnus<br>dasycarpus Turcz.<br>[Rutaceae], Bassia<br>scoparia (L.) A.J.Scott<br>[Amaranthaceae] |           |   |   |
| Luo<br>(2018) | Zicaohuoxue<br>decoction | Prepared<br>by<br>Researcher<br>s | <i>Lithospermi</i><br><i>radix, Pinelliae</i><br><i>tuber, Coptis</i><br><i>chinensis,</i><br><i>Eupolyphaga,</i>      | Arnebia euchroma<br>(Royle ex Benth.)<br>I.M.Johnst.<br>[Boraginaceae],<br>Pinellia ternata                                                                                                                                                                                                                                                                                                                                                          | Decoction | N | N |

---

|                          |                                     |
|--------------------------|-------------------------------------|
| <i>Cicadidae</i>         | (Thunb.) Makino                     |
| <i>periostracum,</i>     | [Araceae], <i>Coptis</i>            |
| <i>Moutan radices</i>    | <i>chinensis</i> Franch.            |
| <i>cortex, Indigo</i>    | [Ranunculaceae],                    |
| <i>Pulverata levis</i>   | <i>Eupolyphaga sinensis</i>         |
| <i>citri</i>             | Walker [Blattidae],                 |
| <i>Unshius</i>           | <i>Cryptotympana</i>                |
| <i>pericarpium,</i>      | <i>dubia</i> (Haupt)                |
| <i>Magnoliae cortex,</i> | [Cicadidae], <i>Paeonia</i>         |
| <i>Kochiae fructus,</i>  | × <i>suffruticosa</i>               |
| <i>Dictamni radices</i>  | Andrews                             |
| <i>cortex, Angelicae</i> | [Paeoniaceae],                      |
| <i>sinensis radix,</i>   | <i>Persicaria tinctoria</i>         |
| <i>Lumbricus</i>         | (Aiton) Spach                       |
|                          | [Polygonaceae],                     |
|                          | <i>Citrus</i> × <i>aurantium</i> f. |
|                          | <i>deliciosa</i> (Ten.)             |
|                          | M.Hiroe [Rutaceae],                 |
|                          | <i>Magnolia officinalis</i>         |
|                          | Rehder & E.H.Wilson                 |
|                          | [Magnoliaceae],                     |
|                          | <i>Bassia scoparia</i> (L.)         |
|                          | A.J.Scott                           |
|                          | [Amaranthaceae],                    |
|                          | <i>Dictamnus</i>                    |
|                          | <i>dasycarpus</i> Turcz.            |
|                          | [Rutaceae], <i>Angelica</i>         |

---

|               |                    |                                                                                  |                                                                                                                                                                                                                                                                                                                                                       |                                                                                                                                                                                                                                                                                                                                                                                                                                                                         |         |   |   |
|---------------|--------------------|----------------------------------------------------------------------------------|-------------------------------------------------------------------------------------------------------------------------------------------------------------------------------------------------------------------------------------------------------------------------------------------------------------------------------------------------------|-------------------------------------------------------------------------------------------------------------------------------------------------------------------------------------------------------------------------------------------------------------------------------------------------------------------------------------------------------------------------------------------------------------------------------------------------------------------------|---------|---|---|
|               |                    |                                                                                  |                                                                                                                                                                                                                                                                                                                                                       | sinensis (Oliv.) Diels<br>[Apiaceae], Pericaeta<br>communisma Gate et<br>Hatai [Lumbricidae]                                                                                                                                                                                                                                                                                                                                                                            |         |   |   |
| Ma<br>(2018a) | Xiaoyin<br>granule | Commerci<br>al supplier<br>Shaanxi<br>Kanghui<br>Pharmaceu<br>tical Co.,<br>Ltd. | <i>Rehmanniae radix<br/>recens, Moutan<br/>radicis cortex,<br/>Paeoniae radix<br/>rubra, Angelicae<br/>sinensis radix,<br/>Sophorae radix,<br/>Lonicerae flos,<br/>Scrophulariae<br/>radix, Arctii<br/>fructus, Cicadidae<br/>periostracum,<br/>Dictamni radicis<br/>cortex, Isatidis<br/>folium, Carthami<br/>flos,<br/>Saposhnikoviae<br/>radix</i> | Rehmannia glutinosa<br>(Gaertn.) DC.<br>[Orobanchaceae](Reh<br>manniae Radix<br>Recens), Paeonia ×<br>suffruticosa Andrews<br>[Paeoniaceae],<br>Paeonia anomala<br>subsp. veitchii<br>(Lynch) D.Y.Hong &<br>K.Y.Pan<br>[Paeoniaceae],<br>Angelica sinensis<br>(Oliv.) Diels<br>[Apiaceae], Sophora<br>flavescens Aiton<br>[Fabaceae], Lonicera<br>japonica Thunb.<br>[Caprifoliaceae],<br>Scrophularia<br>ningpoensis Hemsl.<br>[Scrophulariaceae],<br>Arctium lappa L. | Granule | N | N |



|               |                          |                                   |                                                                                                                                                                                                                                                                    |                                                                                                                                                                                                                                                                                                      |           |   |  |   |
|---------------|--------------------------|-----------------------------------|--------------------------------------------------------------------------------------------------------------------------------------------------------------------------------------------------------------------------------------------------------------------|------------------------------------------------------------------------------------------------------------------------------------------------------------------------------------------------------------------------------------------------------------------------------------------------------|-----------|---|--|---|
|               |                          |                                   |                                                                                                                                                                                                                                                                    | [Asteraceae],<br>Cryptotympana<br>dubia (Haupt)<br>[Cicadidae],<br>Dictamnus<br>dasycarpus Turcz.<br>[Rutaceae], Isatis<br>tinctoria subsp.<br>tinctoria<br>[Brassicaceae],<br>Carthamus tinctorius<br>L. [Asteraceae],<br>Saposhnikovia<br>divaricata (Turcz. ex<br>Ledeb.) Schischk.<br>[Apiaceae] |           |   |  |   |
| Ma<br>(2018b) | Qingrequshi<br>decoction | Prepared<br>by<br>Researcher<br>s | <i>Sophorae flos,</i><br><i>Atractylodis</i><br><i>rhizoma lba,</i><br><i>Smilax glabrae</i><br><i>rhizoma,</i><br><i>Angelicae</i><br><i>sinensis radix,</i><br><i>Stephania</i><br><i>tetrandra, Isatidis</i><br><i>folium, Gentianae</i><br><i>macrophyllae</i> | Styphnolobium<br>japonicum (L.) Schott<br>[Fabaceae],<br>Atractylodes lancea<br>(Thunb.) DC.<br>[Asteraceae], Smilax<br>glabra Roxb.<br>[Smilacaceae],<br>Angelica sinensis<br>(Oliv.) Diels<br>[Apiaceae], Stephania                                                                                | Decoction | N |  | N |

|                |                      |                                   |                                                                                                                                                                                                                                                                   |                                                                                                                                                                                                                                                                      |           |   |   |
|----------------|----------------------|-----------------------------------|-------------------------------------------------------------------------------------------------------------------------------------------------------------------------------------------------------------------------------------------------------------------|----------------------------------------------------------------------------------------------------------------------------------------------------------------------------------------------------------------------------------------------------------------------|-----------|---|---|
|                |                      |                                   | <i>radix, Scutellariae<br/>barbatae herba,<br/>Glycyrrhizae<br/>radix et rhizoma</i>                                                                                                                                                                              | tetrandra S.Moore<br>[Menispermaceae],<br>Isatis tinctoria subsp.<br>tinctoria<br>[Brassicaceae],<br>Gentiana<br>macrophylla Pall.<br>[Gentianaceae],<br>Scutellaria barbata<br>D.Don [Lamiaceae],<br>Glycyrrhiza uralensis<br>Fisch. ex DC.<br>[Fabaceae]           |           |   |   |
| Xiao<br>(2018) | Xiaoyin<br>decoction | Prepared<br>by<br>Researcher<br>s | <i>Rehmanniae radix<br/>recens, Smilax<br/>glabrae rhizoma,<br/>Lonicerae flos,<br/>Mume fructus,<br/>Lithospermi<br/>radix, Zaocys,<br/>Imperatae<br/>rhizoma,<br/>Spatholobi caulis,<br/>Ecliptae herba,<br/>Sophorae<br/>tonkinensis radix<br/>et rhizoma,</i> | Rehmannia glutinosa<br>(Gaertn.) DC.<br>[Orobanchaceae](Reh<br>manniae Radix<br>Recens), Smilax<br>glabra Roxb.<br>[Smilacaceae],<br>Lonicera japonica<br>Thunb.<br>[Caprifoliaceae],<br>Prunus mume<br>(Siebold) Siebold &<br>Zucc. [Rosaceae],<br>Arnebia euchroma | Decoction | N | N |

|               |                       |                                                |                                                                                                                            |                                                                                                                                                                                                                                                                                                                                                                                                                                                                                                                                                           |         |   |   |  |
|---------------|-----------------------|------------------------------------------------|----------------------------------------------------------------------------------------------------------------------------|-----------------------------------------------------------------------------------------------------------------------------------------------------------------------------------------------------------------------------------------------------------------------------------------------------------------------------------------------------------------------------------------------------------------------------------------------------------------------------------------------------------------------------------------------------------|---------|---|---|--|
|               |                       |                                                | <i>Sophorae flos</i> ,<br><i>Sophorae radix</i> ,<br><i>Glycyrrhizae</i><br><i>radix et rhizoma</i>                        | (Royle ex Benth.)<br>I.M.Johnst.<br>[Boraginaceae],<br><i>Zaocys dhumnades</i><br>Cantor [Colubridae],<br><i>Imperata cylindrica</i><br>(L.) Raeusch.<br>[Poaceae],<br><i>Spatholobus</i><br><i>suberectus</i> Dunn<br>[Fabaceae], <i>Eclipta</i><br><i>prostrata</i> (L.) L.<br>[Asteraceae], <i>Sophora</i><br><i>tonkinensis</i> Gagnep.<br>[Fabaceae],<br><i>Styphnolobium</i><br><i>japonicum</i> (L.) Schott<br>[Fabaceae], <i>Sophora</i><br><i>flavescens</i> Aiton<br>[Fabaceae],<br><i>Glycyrrhiza uralensis</i><br>Fisch. ex DC.<br>[Fabaceae] |         |   |   |  |
| Xie<br>(2018) | Qingying<br>decoction | Commerci<br>al supplier<br>Guangdong<br>Yifang | <i>Bubalus bubalis</i> ,<br><i>Rehmanniae radix</i><br><i>recens</i> , <i>Lonicerae</i><br><i>flos</i> , <i>Forsythiae</i> | <i>Bubalus bubalis</i><br>Linné [Bovidae],<br><i>Rehmannia glutinosa</i><br>(Gaertn.) DC.                                                                                                                                                                                                                                                                                                                                                                                                                                                                 | Granule | N | N |  |

---

|                                 |                                                                                                                                                                                                                                                                           |                                                                                                                                                                                                                                                                                                                                                                                                                                                                                                                       |
|---------------------------------|---------------------------------------------------------------------------------------------------------------------------------------------------------------------------------------------------------------------------------------------------------------------------|-----------------------------------------------------------------------------------------------------------------------------------------------------------------------------------------------------------------------------------------------------------------------------------------------------------------------------------------------------------------------------------------------------------------------------------------------------------------------------------------------------------------------|
| Pharmaceu<br>tical Co.,<br>Ltd. | <i>fructus,<br/>Scrophulariae<br/>radix, Salviae<br/>miltiorrhizae<br/>radix, Liriopsis seu<br/>ophiopogonis<br/>tuber, Moutan<br/>radicis cortex,<br/>Dictamni radicis<br/>cortex, Astragali<br/>radix, Ganoderma<br/>lucidum,<br/>Glycyrrhizae<br/>radix et rhizoma</i> | [Orobanchaceae](Reh<br>manniae Radix<br>Recens), Lonicera<br>japonica Thunb.<br>[Caprifoliaceae],<br>Forsythia suspensa<br>(Thunb.) Vahl<br>[Oleaceae],<br>Scrophularia<br>ningpoensis Hemsl.<br>[Scrophulariaceae]m,<br>Salvia miltiorrhiza<br>Bunge [Lamiaceae],<br>Ophiopogon<br>japonicus (Thunb.)<br>Ker Gawl.<br>[Asparagaceae],<br>Paeonia × suffruticosa<br>Andrews<br>[Paeoniaceae],<br>Dictamnus<br>dasycarpus Turcz.<br>[Rutaceae],<br>Astragalus<br>mongholicus Bunge<br>[Fabaceae],<br>Ganoderma lucidum |
|---------------------------------|---------------------------------------------------------------------------------------------------------------------------------------------------------------------------------------------------------------------------------------------------------------------------|-----------------------------------------------------------------------------------------------------------------------------------------------------------------------------------------------------------------------------------------------------------------------------------------------------------------------------------------------------------------------------------------------------------------------------------------------------------------------------------------------------------------------|

---

|                  |                          |                                                                                  |                                                                                                                                                                                                                                                                                                                |                                                                                                                                                                                                                                                                                                    |         |   |   |
|------------------|--------------------------|----------------------------------------------------------------------------------|----------------------------------------------------------------------------------------------------------------------------------------------------------------------------------------------------------------------------------------------------------------------------------------------------------------|----------------------------------------------------------------------------------------------------------------------------------------------------------------------------------------------------------------------------------------------------------------------------------------------------|---------|---|---|
|                  |                          |                                                                                  |                                                                                                                                                                                                                                                                                                                | Karsten<br>[Polyporaceae],<br>Glycyrrhiza uralensis<br>Fisch. ex DC.<br>[Fabaceae]                                                                                                                                                                                                                 |         |   |   |
| Zhang<br>(2018a) | Compound<br>glycyrrhizin | Commerci<br>al supplier<br>Minophag<br>en<br>Pharmaceu<br>tical Co.,<br>Ltd.     | <i>Glycyrrhizae<br/>radix et rhizoma</i>                                                                                                                                                                                                                                                                       | Glycyrrhiza uralensis<br>Fisch. ex DC.<br>[Fabaceae]                                                                                                                                                                                                                                               | Tablet  | N | N |
| Zhang<br>(2018b) | Xiaoyin<br>granule       | Commerci<br>al supplier<br>Shaanxi<br>Kanghui<br>Pharmaceu<br>tical Co.,<br>Ltd. | <i>Rehmanniae radix<br/>recens, Moutan<br/>radicis cortex,<br/>Paeoniae radix<br/>rubra, Angelicae<br/>sinensis radix,<br/>Sophorae radix,<br/>Lonicerae flos,<br/>Scrophulariae<br/>radix, Arctii<br/>fructus, Cicadidae<br/>periostracum,<br/>Dictamni radicis<br/>cortex, Isatidis<br/>folium, Carthami</i> | Rehmannia glutinosa<br>(Gaertn.) DC.<br>[Orobanchaceae](Reh<br>manniae Radix<br>Recens), Paeonia ×<br>suffruticosa Andrews<br>[Paeoniaceae],<br>Paeonia anomala<br>subsp. veitchii<br>(Lynch) D.Y.Hong &<br>K.Y.Pan<br>[Paeoniaceae],<br>Angelica sinensis<br>(Oliv.) Diels<br>[Apiaceae], Sophora | Granule | N | N |

|                |             |                              |                                                                |                                                                                                                                                                                                                                                                                                                                                                                                                                                                           |      |   |   |
|----------------|-------------|------------------------------|----------------------------------------------------------------|---------------------------------------------------------------------------------------------------------------------------------------------------------------------------------------------------------------------------------------------------------------------------------------------------------------------------------------------------------------------------------------------------------------------------------------------------------------------------|------|---|---|
|                |             |                              | <i>flos,</i><br><i>Saposhnikoviae</i><br><i>radix</i>          | flavescens Aiton<br>[Fabaceae], Lonicera<br>japonica Thunb.<br>[Caprifoliaceae],<br>Scrophularia<br>ningpoensis Hemsl.<br>[Scrophulariaceae],<br>Arctium lappa L.<br>[Asteraceae],<br>Cryptotympana<br>dubia (Haupt)<br>[Cicadidae],<br>Dictamnus<br>dasycarpus Turcz.<br>[Rutaceae], Isatis<br>tinctoria subsp.<br>tinctoria<br>[Brassicaceae],<br>Carthamus tinctorius<br>L. [Asteraceae],<br>Saposhnikovia<br>divaricata (Turcz. ex<br>Ledeb.) Schischk.<br>[Apiaceae] |      |   |   |
| Zhou<br>(2018) | Keyin pills | Commercial supplier<br>Jilin | <i>Smilax glabrae</i><br><i>rhizoma,</i><br><i>Menispermum</i> | Smilax glabra Roxb.<br>[Smilacaceae],<br>Menispermum                                                                                                                                                                                                                                                                                                                                                                                                                      | Pill | N | N |

|                |                          |                                                                       |                                                                                                                                                                                           |                                                                                                                                                                              |           |   |   |
|----------------|--------------------------|-----------------------------------------------------------------------|-------------------------------------------------------------------------------------------------------------------------------------------------------------------------------------------|------------------------------------------------------------------------------------------------------------------------------------------------------------------------------|-----------|---|---|
|                |                          | Tiantai<br>Pharmaceu<br>tical Co.,<br>Ltd.                            | <i>dauricum</i> ,<br><i>Dictamni radice</i><br><i>cortex</i> ,<br><i>Polygonum</i><br><i>bistorta</i>                                                                                     | dauricum DC.<br>[Menispermaceae],<br>Dictamnus<br>dasycarpus Turcz.<br>[Rutaceae], Bistorta<br>officinalis Delarbre<br>[Polygonaceae]                                        |           |   |   |
| Chen<br>(2019) | Compound<br>glycyrrhizin | Commerci<br>al supplier<br>Lepu<br>Pharmaceu<br>tical Co.,<br>Ltd.    | <i>Glycyrrhizae</i><br><i>radix et rhizoma</i>                                                                                                                                            | Glycyrrhiza uralensis<br>Fisch. ex DC.<br>[Fabaceae]                                                                                                                         | Tablet    | N | N |
| Ge<br>(2019)   | Compound<br>glycyrrhizin | Commerci<br>al supplier<br>Ruiyang<br>Pharmaceu<br>tical Co.,<br>Ltd. | <i>Glycyrrhizae</i><br><i>radix et rhizoma</i>                                                                                                                                            | Glycyrrhiza uralensis<br>Fisch. ex DC.<br>[Fabaceae]                                                                                                                         | Capsule   | N | N |
| Han<br>(2019)  | Qinzhuliangx<br>ue feng  | Prepared<br>by<br>Researcher<br>s                                     | <i>Scutellariae radix</i> ,<br><i>Ecliptae herba</i> ,<br><i>Rehmanniae radix</i><br><i>recens</i> ,<br><i>Scrophulariae</i><br><i>radix</i> ,<br><i>Saposhnikoviae</i><br><i>radix</i> , | Scutellaria baicalensis<br>Georgi [Lamiaceae],<br>Eclipta prostrata (L.)<br>L. [Asteraceae],<br>Rehmannia glutinosa<br>(Gaertn.) DC.<br>[Orobanchaceae](Reh<br>manniae Radix | Decoction | N | N |

---

|                          |                        |
|--------------------------|------------------------|
| <i>Lithospermi</i>       | Recens), Scrophularia  |
| <i>radix,</i>            | ningpoensis Hemsl.     |
| <i>Glycyrrhizae</i>      | [Scrophulariaceae],    |
| <i>radix et rhizoma,</i> | Saposhnikovia          |
| <i>Cynanchi</i>          | divaricata (Turcz. ex  |
| <i>paniculati radix</i>  | Ledeb.) Schischk.      |
| <i>et rhizoma,</i>       | [Apiaceae], Arnebia    |
| <i>Paeoniae radix</i>    | euchroma (Royle ex     |
| <i>rubra, Moutan</i>     | Benth.) I.M.Johnst.    |
| <i>radicis cortex,</i>   | [Boraginaceae],        |
| <i>Lonicerae flos,</i>   | Glycyrrhiza uralensis  |
| <i>Margaritifera</i>     | Fisch. ex DC.          |
| <i>concha</i>            | [Fabaceae],            |
|                          | Vincetoxicum           |
|                          | mukdenense Kitag.      |
|                          | [Apocynaceae],         |
|                          | Paeonia anomala        |
|                          | subsp. veitchii        |
|                          | (Lynch) D.Y.Hong &     |
|                          | K.Y.Pan                |
|                          | [Paeoniaceae],         |
|                          | Paeonia × suffruticosa |
|                          | Andrews                |
|                          | [Paeoniaceae],         |
|                          | Lonicera japonica      |
|                          | Thunb.                 |
|                          | [Caprifoliaceae],      |

---



|              |                              |                                   |                                                                                                                                                                                                                                                                                                                                                                  |                                                                                                                                                                                                                                                                                                                                                                                                                                                                                                  |           |   |   |
|--------------|------------------------------|-----------------------------------|------------------------------------------------------------------------------------------------------------------------------------------------------------------------------------------------------------------------------------------------------------------------------------------------------------------------------------------------------------------|--------------------------------------------------------------------------------------------------------------------------------------------------------------------------------------------------------------------------------------------------------------------------------------------------------------------------------------------------------------------------------------------------------------------------------------------------------------------------------------------------|-----------|---|---|
|              |                              |                                   |                                                                                                                                                                                                                                                                                                                                                                  | Pinctada imbricata<br>Röding [Pteriidae]                                                                                                                                                                                                                                                                                                                                                                                                                                                         |           |   |   |
|              |                              |                                   |                                                                                                                                                                                                                                                                                                                                                                  | Rehmannia glutinosa<br>(Gaertn.) DC.<br>[Orobanchaceae](Reh<br>manniae Radix<br>Recens), Rehmannia<br>glutinosa (Gaertn.)<br>DC.<br>[Orobanchaceae](Reh<br>manniae Radix<br>Preparata), Bubalus<br>bubalis Linné<br>[Bovidae],<br>Styphnolobium<br>japonicum (L.) Schott<br>[Fabaceae],<br>Scrophularia<br>ningpoensis Hemsl.<br>[Scrophulariaceae],<br>Duchesnea indica,<br>Scutellaria barbata<br>D.Don [Lamiaceae],<br>Paeonia × suffruticosa<br>Andrews<br>[Paeoniaceae],<br>Paeonia anomala |           |   |   |
| Hu<br>(2019) | Liangxuexiao<br>bi decoction | Prepared<br>by<br>Researcher<br>s | <i>Rehmanniae radix<br/>recens,</i><br><i>Rehmanniae radix<br/>preparata,</i><br><i>Bubalus bubalis,</i><br><i>Sophorae flos,</i><br><i>Scrophulariae<br/>radix, Duchesnea<br/>indica,</i><br><i>Scutellariae<br/>barbatae herba,</i><br><i>Moutan radices<br/>cortex, Paeoniae<br/>radix rubra,</i><br><i>Imperatae<br/>rhizoma,</i><br><i>Hedyotidis herba</i> |                                                                                                                                                                                                                                                                                                                                                                                                                                                                                                  | Decoction | N | N |

|              |                           |                                                                                                 |                                                                                                                                                                                                                                                                                               |                                                                                                                                                                                                                                                                                                                                        |         |   |   |
|--------------|---------------------------|-------------------------------------------------------------------------------------------------|-----------------------------------------------------------------------------------------------------------------------------------------------------------------------------------------------------------------------------------------------------------------------------------------------|----------------------------------------------------------------------------------------------------------------------------------------------------------------------------------------------------------------------------------------------------------------------------------------------------------------------------------------|---------|---|---|
|              |                           |                                                                                                 |                                                                                                                                                                                                                                                                                               | subsp. veitchii<br>(Lynch) D.Y.Hong &<br>K.Y.Pan<br>[Paeoniaceae],<br>Imperata cylindrica<br>(L.) Raeusch.<br>[Poaceae],<br>Scleromitron<br>diffusum (Willd.)<br>R.J.Wang [Rubiaceae]                                                                                                                                                  |         |   |   |
| Lu<br>(2019) | Yangxuequfe<br>ng granule | Commercial supplier<br>Shanghai<br>China<br>Resources<br>999<br>Pharmaceu<br>tical Co.,<br>Ltd. | <i>Angelicae<br/>sinensis radix,<br/>Paeonia lactiflora,<br/>Cnidii rhizoma,<br/>Rehmanniae radix<br/>recens, Spatholobi<br/>caulis, Polygoni<br/>multiflori radix,<br/>Tribuli fructus,<br/>Saposhnikoviae<br/>radix,<br/>Schizonepetae<br/>spica,<br/>Glycyrrhizae<br/>radix et rhizoma</i> | Angelica sinensis<br>(Oliv.) Diels<br>[Apiaceae], Paeonia<br>lactiflora Pall.<br>[Paeoniaceae](Paeoni<br>a lactiflora Alba),<br>Conioselinum<br>anthriscoides<br>'Chuanxiong'<br>[Apiaceae],<br>Rehmannia glutinosa<br>(Gaertn.) DC.<br>[Orobanchaceae](Reh<br>manniae Radix<br>Recens), Spatholobus<br>suberectus Dunn<br>[Fabaceae], | Granule | N | N |

|                |                                |                                                                                  |                                                                                                                                   |                                                                                                                                                                                                                                                                                                |         |   |   |
|----------------|--------------------------------|----------------------------------------------------------------------------------|-----------------------------------------------------------------------------------------------------------------------------------|------------------------------------------------------------------------------------------------------------------------------------------------------------------------------------------------------------------------------------------------------------------------------------------------|---------|---|---|
|                |                                |                                                                                  |                                                                                                                                   | Reynoutria multiflora<br>(Thunb.) Moldenke<br>[Polygonaceae],<br>Tribulus terrestris L.<br>[Zygophyllaceae],<br>Saposhnikovia<br>divaricata (Turcz. ex<br>Ledeb.) Schischk.<br>[Apiaceae], Nepeta<br>tenuifolia Benth.<br>[Lamiaceae],<br>Glycyrrhiza uralensis<br>Fisch. ex DC.<br>[Fabaceae] |         |   |   |
| Xun<br>(2019)  | Yinxie<br>capsule              | Commercial supplier<br>Xinjiang<br>Wei-A-<br>Tang<br>Pharmaceutical Co.,<br>Ltd. | <i>Smilax glabrae</i><br><i>rhizoma</i> , <i>Smilacis</i><br><i>chinae rhizoma</i>                                                | Smilax glabra Roxb.<br>[Smilacaceae], Smilax<br>china L.<br>[Smilacaceae]                                                                                                                                                                                                                      | Capsule | N | N |
| Yang<br>(2019) | Compound<br>Qingdai<br>capsule | Commercial supplier<br>Shaanxi<br>Pharmaceutical                                 | <i>Indigo pulverata</i><br><i>levis</i> , <i>Mume</i><br><i>fructus</i> , <i>Taraxaci</i><br><i>herba</i> ,<br><i>Lithospermi</i> | Persicaria tinctoria<br>(Aiton) Spach<br>[Polygonaceae],<br>Prunus mume<br>(Siebold) Siebold &                                                                                                                                                                                                 | Capsule | N | N |

---

|            |                          |                       |
|------------|--------------------------|-----------------------|
| Holdings   | <i>radix, Angelicae</i>  | Zucc. [Rosaceae],     |
| Group      | <i>dahuricae radix,</i>  | Taraxacum             |
| Tianning   | <i>Salviae</i>           | mongolicum Hand.-     |
| Pharmaceu  | <i>miltiorrhizae</i>     | Mazz. [Asteraceae],   |
| tical Co., | <i>radix, Dictamni</i>   | Arnebia euchroma      |
| LTD.       | <i>radicis cortex,</i>   | (Royle ex Benth.)     |
|            | <i>Massa medicata</i>    | I.M.Johnst.           |
|            | <i>fermentata,</i>       | [Boraginaceae],       |
|            | <i>Dryopteridis</i>      | Angelica dahurica     |
|            | <i>crassirhizomatis</i>  | (Hoffm.) Benth. &     |
|            | <i>rhizoma, Smilax</i>   | Hook.f. ex Franch. &  |
|            | <i>glabrae rhizoma,</i>  | Sav. [Apiaceae],      |
|            | <i>Portulacae herba,</i> | Salvia miltiorrhiza   |
|            | <i>Dioscorea</i>         | Bunge [Lamiaceae],    |
|            | <i>hypoglauca,</i>       | Dictamnus             |
|            | <i>Crataegi fructus,</i> | dasycarpus Turcz.     |
|            | <i>Schisandrae</i>       | [Rutaceae], Massa     |
|            | <i>fructus</i>           | Medicata Fermentata,  |
|            |                          | Dryopteris            |
|            |                          | crassirhizoma Nakai   |
|            |                          | [Polypodiaceae],      |
|            |                          | Smilax glabra Roxb.   |
|            |                          | [Smilacaceae],        |
|            |                          | Portulaca oleracea L. |
|            |                          | [Portulacaceae],      |
|            |                          | Dioscorea collettii   |
|            |                          | var. hypoglauca       |

---

|               |                              |                                   |                                                                                                                                                                                                                                                                                                                                                                                                                                                                     |                                                                                                                                                                                                                                                                                                                                                                                                                                                                  |           |   |   |
|---------------|------------------------------|-----------------------------------|---------------------------------------------------------------------------------------------------------------------------------------------------------------------------------------------------------------------------------------------------------------------------------------------------------------------------------------------------------------------------------------------------------------------------------------------------------------------|------------------------------------------------------------------------------------------------------------------------------------------------------------------------------------------------------------------------------------------------------------------------------------------------------------------------------------------------------------------------------------------------------------------------------------------------------------------|-----------|---|---|
|               |                              |                                   |                                                                                                                                                                                                                                                                                                                                                                                                                                                                     | (Palib.) S.J.Pei &<br>C.T.Ting<br>[Dioscoreaceae],<br>Crataegus pinnatifida<br>var. pinnatifida<br>[Rosaceae],<br>Schisandra chinensis<br>(Turcz.) Baill.<br>[Schisandraceae]                                                                                                                                                                                                                                                                                    |           |   |   |
| Yao<br>(2019) | Liangxuerun<br>zao decoction | Prepared<br>by<br>Researcher<br>s | <i>Smilax glabrae</i><br><i>rhizoma</i> ,<br><i>Lonicerae folium</i><br><i>et caulis</i> , <i>Isatidis</i><br><i>radix</i> , <i>Paris</i><br><i>polyphylla</i> ,<br><i>Dictamni radices</i><br><i>cortex</i> ,<br><i>Rehmanniae radix</i><br><i>recens</i> , <i>Clematidis</i><br><i>radix</i> ,<br><i>Anemarrhenae</i><br><i>rhizoma</i> ,<br><i>Sophorae</i><br><i>tonkinensis radix</i><br><i>et rhizoma</i> ,<br><i>Glycyrrhizae</i><br><i>radix et rhizoma</i> | <i>Smilax glabra</i> Roxb.<br>[Smilacaceae],<br><i>Lonicera japonica</i><br>Thunb.<br>[Caprifoliaceae],<br><i>Isatis tinctoria</i> subsp.<br><i>tinctoria</i><br>[Brassicaceae]( <i>Isatidis</i><br><i>Radix</i> ), <i>Paris</i><br><i>polyphylla</i> ,<br><i>Dictamnus</i><br><i>dasycarpus</i> Turcz.<br>[Rutaceae],<br><i>Rehmannia glutinosa</i><br>(Gaertn.) DC.<br>[Orobanchaceae]( <i>Reh</i><br><i>manniae Radix</i><br><i>Recens</i> ), <i>Clematis</i> | Decoction | N | N |

|                 |                      |                                                                      |                                                                                                                                                                                                                                                                                                                                                                                                                          |                                                                                                                                                                                                                                                                                                                                                             |         |   |   |
|-----------------|----------------------|----------------------------------------------------------------------|--------------------------------------------------------------------------------------------------------------------------------------------------------------------------------------------------------------------------------------------------------------------------------------------------------------------------------------------------------------------------------------------------------------------------|-------------------------------------------------------------------------------------------------------------------------------------------------------------------------------------------------------------------------------------------------------------------------------------------------------------------------------------------------------------|---------|---|---|
|                 |                      |                                                                      |                                                                                                                                                                                                                                                                                                                                                                                                                          | chinensis Osbeck<br>[Ranunculaceae],<br>Anemarrhena<br>asphodeloides Bunge<br>[Asparagaceae],<br>Sophora tonkinensis<br>Gagnep. [Fabaceae],<br>Glycyrrhiza uralensis<br>Fisch. ex DC.<br>[Fabaceae]                                                                                                                                                         |         |   |   |
| Zhong<br>(2019) | Piminxiao<br>capsule | Commercial supplier<br>Sichuan Defeng<br>Pharmaceutical Co.,<br>Ltd. | <i>Sophorae radix,</i><br><i>Atractylodis</i><br><i>rhizoma,</i><br><i>Saposhnikoviae</i><br><i>radix,</i><br><i>Schizonepetae</i><br><i>spica, Tribuli</i><br><i>fructus, Dictamni</i><br><i>radicis cortex,</i><br><i>Cnidi fructus,</i><br><i>Xanthii fructus,</i><br><i>Scolopendra,</i><br><i>Indigo pulverata</i><br><i>levis, Taraxaci</i><br><i>herba, Violae</i><br><i>herba,</i><br><i>Scutellariae radix,</i> | Sophora flavescens<br>Aiton [Fabaceae],<br>Atractylodes lancea<br>(Thunb.) DC.<br>[Asteraceae](Atractyl<br>odis Rhizoma),<br>Saposhnikovia<br>divaricata (Turcz. ex<br>Ledeb.) Schischk.<br>[Apiaceae], Nepeta<br>tenuifolia Benth.<br>[Lamiaceae], Tribulus<br>terrestris L.<br>[Zygophyllaceae],<br>Dictamnus<br>dasycarpus Turcz.<br>[Rutaceae], Cnidium | Capsule | N | N |

---

|                         |                         |
|-------------------------|-------------------------|
| <i>Phellodendri</i>     | monnieri (L.) Cusson    |
| <i>cortex, Coptis</i>   | [Apiaceae], Xanthium    |
| <i>chinensis,</i>       | strumarium L.           |
| <i>Cicadidae</i>        | [Asteraceae],           |
| <i>periostracum,</i>    | Scolopendra             |
| <i>Rehmanniae radix</i> | subspinipes mutilans    |
| <i>recens, Moutan</i>   | Linné Koch              |
| <i>radicis cortex,</i>  | [Scolopendridae],       |
| <i>Tamarics</i>         | Persicaria tinctoria    |
| <i>cacumen,</i>         | (Aiton) Spach           |
| <i>Lithospermi</i>      | [Polygonaceae],         |
| <i>radix, Lycii</i>     | Taraxacum               |
| <i>radicis cortex</i>   | mongolicum Hand.-       |
|                         | Mazz. [Asteraceae],     |
|                         | Viola mandshurica       |
|                         | W.Becker [Violaceae],   |
|                         | Scutellaria baicalensis |
|                         | Georgi [Lamiaceae],     |
|                         | Phellodendron           |
|                         | chinense                |
|                         | C.K.Schneid.            |
|                         | [Rutaceae], Coptis      |
|                         | chinensis Franch.       |
|                         | [Ranunculaceae],        |
|                         | Cryptotympana           |
|                         | dubia (Haupt)           |
|                         | [Cicadidae],            |

---

|             |                       |                                                      |                                                                                               |                                                                                                                                                                                                                                                                                       |         |   |   |
|-------------|-----------------------|------------------------------------------------------|-----------------------------------------------------------------------------------------------|---------------------------------------------------------------------------------------------------------------------------------------------------------------------------------------------------------------------------------------------------------------------------------------|---------|---|---|
|             |                       |                                                      |                                                                                               | Rehmannia glutinosa<br>(Gaertn.) DC.<br>[Orobanchaceae](Rehmanniae Radix Recens), Paeonia × suffruticosa Andrews<br>[Paeoniaceae],<br>Tamarix chinensis Lour. [Tamaricaceae],<br>Arnebia euchroma (Royle ex Benth.) I.M.Johnst.<br>[Boraginaceae],<br>Lycium barbarum L. [Solanaceae] |         |   |   |
| Chen (2020) | Compound glycyrrhizin | Commercial supplier Ruiyang Pharmaceutical Co., Ltd. | <i>Glycyrrhizae radix et rhizoma</i>                                                          | Glycyrrhiza uralensis Fisch. ex DC. [Fabaceae]                                                                                                                                                                                                                                        | Capsule | N | N |
| Hao (2020)  | Liangxuexiao bi Pill  | Prepared by Researchers                              | <i>Rehmanniae radix recens, Paeoniae radix rubra, Saposhnikoviae radix, Hedyotidis herba,</i> | Rehmannia glutinosa (Gaertn.) DC. [Orobanchaceae](Rehmanniae Radix Recens), Paeonia anomala subsp.                                                                                                                                                                                    | Pill    | N | N |



|              |                                |                                    |                                                                                                                                                                                                                  |                                                                                                                                                                                                                                                                                                                                                                                                                                                                        |         |   |   |
|--------------|--------------------------------|------------------------------------|------------------------------------------------------------------------------------------------------------------------------------------------------------------------------------------------------------------|------------------------------------------------------------------------------------------------------------------------------------------------------------------------------------------------------------------------------------------------------------------------------------------------------------------------------------------------------------------------------------------------------------------------------------------------------------------------|---------|---|---|
|              |                                |                                    | <i>Scutellariae</i><br><i>rarbatae herba,</i><br><i>Isatidis folium,</i><br><i>Salviae</i><br><i>miltiorrhizae</i><br><i>radix, Astragali</i><br><i>radix,</i><br><i>Glycyrrhizae</i><br><i>radix et rhizoma</i> | veitchii (Lynch)<br>D.Y.Hong & K.Y.Pan<br>[Paeoniaceae],<br>Saposhnikovia<br>divaricata (Turcz. ex<br>Ledeb.) Schischk.<br>[Apiaceae],<br>Scleromitron<br>diffusum (Willd.)<br>R.J.Wang<br>[Rubiaceae],<br>Scutellaria barbata<br>D.Don [Lamiaceae],<br>Isatis tinctoria subsp.<br>tinctoria<br>[Brassicaceae], Salvia<br>miltiorrhiza Bunge<br>[Lamiaceae],<br>Astragalus<br>mongholicus Bunge<br>[Fabaceae],<br>Glycyrrhiza uralensis<br>Fisch. ex DC.<br>[Fabaceae] |         |   |   |
| Ji<br>(2020) | Compound<br>Qingdai<br>capsule | Commerci<br>al supplier<br>Shaanxi | <i>Indigo pulverata</i><br><i>levis, Mume</i><br><i>fructus, Taraxaci</i>                                                                                                                                        | Persicaria tinctoria<br>(Aiton) Spach<br>[Polygonaceae],                                                                                                                                                                                                                                                                                                                                                                                                               | Capsule | N | N |

---

|                                                                                        |                                                                                                                                                                                                                                                                                                                                                                       |                                                                                                                                                                                                                                                                                                                                                                                                                                                                                                                                                              |
|----------------------------------------------------------------------------------------|-----------------------------------------------------------------------------------------------------------------------------------------------------------------------------------------------------------------------------------------------------------------------------------------------------------------------------------------------------------------------|--------------------------------------------------------------------------------------------------------------------------------------------------------------------------------------------------------------------------------------------------------------------------------------------------------------------------------------------------------------------------------------------------------------------------------------------------------------------------------------------------------------------------------------------------------------|
| Pharmaceu<br>tical<br>Holdings<br>Group<br>Tianning<br>Pharmaceu<br>tical Co.,<br>LTD. | <i>herba,<br/>Lithospermi<br/>radix, Angelicae<br/>dahuricae radix,<br/>Salviae<br/>miltiorrhizae<br/>radix, Dictamni<br/>radicis cortex,<br/>Massa medicata<br/>fermentata,<br/>Dryopteridis<br/>crassirhizomatis<br/>rhizoma, Smilax<br/>glabrae rhizoma,<br/>Portulacae herba,<br/>Dioscorea<br/>hypoglauca,<br/>Crataegi fructus,<br/>Schisandrae<br/>fructus</i> | Prunus mume<br>(Siebold) Siebold &<br>Zucc. [Rosaceae],<br>Taraxacum<br>mongolicum Hand.-<br>Mazz. [Asteraceae],<br>Arnebia euchroma<br>(Royle ex Benth.)<br>I.M.Johnst.<br>[Boraginaceae],<br>Angelica dahurica<br>(Hoffm.) Benth. &<br>Hook.f. ex Franch. &<br>Sav. [Apiaceae],<br>Salvia miltiorrhiza<br>Bunge [Lamiaceae],<br>Dictamnus<br>dasycarpus Turcz.<br>[Rutaceae], Massa<br>Medicata Fermentata,<br>Dryopteris<br>crassirhizoma Nakai<br>[Polypodiaceae],<br>Smilax glabra Roxb.<br>[Smilacaceae],<br>Portulaca oleracea L.<br>[Portulacaceae], |
|----------------------------------------------------------------------------------------|-----------------------------------------------------------------------------------------------------------------------------------------------------------------------------------------------------------------------------------------------------------------------------------------------------------------------------------------------------------------------|--------------------------------------------------------------------------------------------------------------------------------------------------------------------------------------------------------------------------------------------------------------------------------------------------------------------------------------------------------------------------------------------------------------------------------------------------------------------------------------------------------------------------------------------------------------|

---

|                |                          |                                                             |                                                                                                                                                                                    |                                                                                                                                                                                                                         |           |   |    |
|----------------|--------------------------|-------------------------------------------------------------|------------------------------------------------------------------------------------------------------------------------------------------------------------------------------------|-------------------------------------------------------------------------------------------------------------------------------------------------------------------------------------------------------------------------|-----------|---|----|
|                |                          |                                                             |                                                                                                                                                                                    | Dioscorea collettii<br>var. hypoglauca<br>(Palib.) S.J.Pei &<br>C.T.Ting<br>[Dioscoreaceae],<br>Crataegus pinnatifida<br>var. pinnatifida<br>[Rosaceae],<br>Schisandra chinensis<br>(Turcz.) Baill.<br>[Schisandraceae] |           |   |    |
| Liu<br>(2020a) | Compound<br>glycyrrhizin | Commercial supplier<br>Eisai<br>Pharmaceutical Co.,<br>Ltd. | <i>Glycyrrhizae<br/>radix et rhizoma</i>                                                                                                                                           | Glycyrrhiza uralensis<br>Fisch. ex DC.<br>[Fabaceae]                                                                                                                                                                    | Tablet    | N | N\ |
| Liu<br>(2020b) | Xiaoyin<br>decoction     | Prepared<br>by<br>Researchers                               | <i>Spatholobi caulis,<br/>Salviae<br/>miltiorrhizae<br/>radix, Sophorae<br/>flos, Imperatae<br/>rhizoma,<br/>Rehmanniae radix<br/>recens ,<br/>Rehmanniae radix<br/>preparata,</i> | Spatholobus<br>suberectus Dunn<br>[Fabaceae], Salvia<br>miltiorrhiza Bunge<br>[Lamiaceae],<br>Styphnolobium<br>japonicum (L.) Schott<br>[Fabaceae], Imperata<br>cylindrica (L.)<br>Raeusch. [Poaceae],                  | Decoction | N | N  |

|              |                                                    |                                                                       |                                                                                                                                      |                                                                                                                                                                                                                                                                                                                                                                                                                                  |         |   |  |   |
|--------------|----------------------------------------------------|-----------------------------------------------------------------------|--------------------------------------------------------------------------------------------------------------------------------------|----------------------------------------------------------------------------------------------------------------------------------------------------------------------------------------------------------------------------------------------------------------------------------------------------------------------------------------------------------------------------------------------------------------------------------|---------|---|--|---|
|              |                                                    |                                                                       | <i>Angelicae<br/>sinensis radix,<br/>Moutan radices<br/>cortex,<br/>Lithospermi<br/>radix,<br/>Glycyrrhizae<br/>radix et rhizoma</i> | Rehmannia glutinosa<br>(Gaertn.) DC.<br>[Orobanchaceae](Reh<br>manniae Radix<br>Recens), Rehmannia<br>glutinosa (Gaertn.)<br>DC.<br>[Orobanchaceae](Reh<br>manniae Radix<br>Preparata), Angelica<br>sinensis (Oliv.) Diels<br>[Apiaceae], Paeonia ×<br>suffruticosa Andrews<br>[Paeoniaceae],<br>Arnebia euchroma<br>(Royle ex Benth.)<br>I.M.Johnst.<br>[Boraginaceae],<br>Glycyrrhiza uralensis<br>Fisch. ex DC.<br>[Fabaceae] |         |   |  |   |
| Lu<br>(2020) | Total<br>Glycosides of<br>Paeoniae<br>Alba capsule | Commerci<br>al supplier<br>Ningbo<br>Lihua<br>Pharmaceu<br>tical Co., | <i>Paeonia lactiflora</i>                                                                                                            | Paeonia lactiflora<br>Pall.<br>[Paeoniaceae](Paeoni<br>a lactiflora Alba)                                                                                                                                                                                                                                                                                                                                                        | Capsule | N |  | N |

|               |                    |                                                                       |                                                                                                                                                                                                                                                                                                                                                              |                                                                                                                                                                                                                                                                                                                                                                                                                                                                 |         |   |   |
|---------------|--------------------|-----------------------------------------------------------------------|--------------------------------------------------------------------------------------------------------------------------------------------------------------------------------------------------------------------------------------------------------------------------------------------------------------------------------------------------------------|-----------------------------------------------------------------------------------------------------------------------------------------------------------------------------------------------------------------------------------------------------------------------------------------------------------------------------------------------------------------------------------------------------------------------------------------------------------------|---------|---|---|
|               |                    | Ltd.                                                                  |                                                                                                                                                                                                                                                                                                                                                              |                                                                                                                                                                                                                                                                                                                                                                                                                                                                 |         |   |   |
| Qu<br>(2020)  | Yinxie<br>capsule  | Commercial supplier<br>Shaanxi Dongtai<br>Pharmaceutical Co.,<br>Ltd. | <i>Smilax glabrae</i><br><i>rhizoma</i> , <i>Smilacis</i><br><i>chinae rhizoma</i>                                                                                                                                                                                                                                                                           | Smilax glabra Roxb.<br>[Smilacaceae], Smilax<br>china L.<br>[Smilacaceae]                                                                                                                                                                                                                                                                                                                                                                                       | Capsule | N | N |
| Ren<br>(2020) | Xiaoyin<br>granule | Prepared<br>by<br>Researchers                                         | <i>Sophorae radix</i> ,<br><i>Angelicae</i><br><i>sinensis radix</i> ,<br><i>Rehmanniae radix</i><br><i>recens</i> ,<br><i>Scrophulariae</i><br><i>radix</i> , <i>Moutan</i><br><i>radicis cortex</i> ,<br><i>Paeoniae radix</i><br><i>rubra</i> , <i>Isatidis</i><br><i>folium</i> , <i>Carthami</i><br><i>flos</i> , <i>Gardenia</i><br><i>jasminoides</i> | <i>Sophora flavescens</i><br>Aiton [Fabaceae],<br><i>Angelica sinensis</i><br>(Oliv.) Diels<br>[Apiaceae],<br><i>Rehmannia glutinosa</i><br>(Gaertn.) DC.<br>[Orobanchaceae]( <i>Reh</i><br><i>manniae Radix</i><br><i>Recens</i> ), <i>Scrophularia</i><br><i>ningpoensis</i> Hemsl.<br>[Scrophulariaceae],<br><i>Paeonia × suffruticosa</i><br>Andrews<br>[Paeoniaceae],<br><i>Paeonia anomala</i><br>subsp. <i>veitchii</i><br>(Lynch) D.Y.Hong &<br>K.Y.Pan | Granule | N | N |

|             |                         |                         |                                                                                                                                                                                                                                                                                                |                                                                                                                                                                                                                                                                                                                |           |   |   |
|-------------|-------------------------|-------------------------|------------------------------------------------------------------------------------------------------------------------------------------------------------------------------------------------------------------------------------------------------------------------------------------------|----------------------------------------------------------------------------------------------------------------------------------------------------------------------------------------------------------------------------------------------------------------------------------------------------------------|-----------|---|---|
|             |                         |                         |                                                                                                                                                                                                                                                                                                | [Paeoniaceae], Isatis tinctoria subsp. tinctoria<br>[Brassicaceae], Carthamus tinctorius L. [Asteraceae], Gardenia jasminoides J.Ellis [Rubiaceae]                                                                                                                                                             |           |   |   |
| Shen (2020) | Liangxuejiedu decoction | Prepared by Researchers | <i>Smilax glabrae rhizoma, Isatidis folium, Lonicerae flos, Rehmanniae radix recens, Paeoniae radix rubra, Paeonia lactiflora, Cnidii rhizoma, Angelicae sinensis radix, Thujae orientalis folium, Moutan radices cortex, Lithospermum radix, Sophorae flos, Glycyrrhizae radix et rhizoma</i> | Smilax glabra Roxb. [Smilacaceae], Isatis tinctoria subsp. tinctoria [Brassicaceae], Lonicera japonica Thunb. [Caprifoliaceae], Rehmannia glutinosa (Gaertn.) DC. [Orobanchaceae](Rehmanniae Radix Recens), Paeonia anomala subsp. veitchii (Lynch) D.Y.Hong & K.Y.Pan [Paeoniaceae], Paeonia lactiflora Pall. | Decoction | N | N |

|           |                       |                                              |                                      |                                                                                                                                                                                                                                                                                                                                                                                                          |        |   |   |
|-----------|-----------------------|----------------------------------------------|--------------------------------------|----------------------------------------------------------------------------------------------------------------------------------------------------------------------------------------------------------------------------------------------------------------------------------------------------------------------------------------------------------------------------------------------------------|--------|---|---|
|           |                       |                                              |                                      | [Paeoniaceae](Paeonia lactiflora Alba),<br>Conioselinum anthriscoides<br>‘Chuanxiong’<br>[Apiaceae], Angelica sinensis (Oliv.) Diels<br>[Apiaceae], Thujae Orientalis Folium,<br>Paeonia × suffruticosa Andrews<br>[Paeoniaceae], Arnebia euchroma (Royle ex Benth.) I.M.Johnst.<br>[Boraginaceae], Styphnolobium japonicum (L.) Schott<br>[Fabaceae], Glycyrrhiza uralensis Fisch. ex DC.<br>[Fabaceae] |        |   |   |
| Wu (2020) | Compound glycyrrhizin | Commercial supplier Lepu Pharmaceutical Co., | <i>Glycyrrhizae radix et rhizoma</i> | Glycyrrhiza uralensis Fisch. ex DC. [Fabaceae]                                                                                                                                                                                                                                                                                                                                                           | Tablet | N | N |

|                |                    | Ltd.                                                                     |                                                                                                                                                                                                                                                                                                                                                       |                                                                                                                                                                                                                                                                                                                                                                                                                                                                                                                        |         |     |
|----------------|--------------------|--------------------------------------------------------------------------|-------------------------------------------------------------------------------------------------------------------------------------------------------------------------------------------------------------------------------------------------------------------------------------------------------------------------------------------------------|------------------------------------------------------------------------------------------------------------------------------------------------------------------------------------------------------------------------------------------------------------------------------------------------------------------------------------------------------------------------------------------------------------------------------------------------------------------------------------------------------------------------|---------|-----|
| Yang<br>(2020) | Xiaoyin<br>granule | Commercial supplier<br>Shaanxi<br>Kanghui<br>Pharmaceutical Co.,<br>Ltd. |                                                                                                                                                                                                                                                                                                                                                       | Rehmannia glutinosa<br>(Gaertn.) DC.<br>[Orobanchaceae](Rehmanniae Radix<br>Recens), Paeonia ×<br>suffruticosa Andrews<br>[Paeoniaceae],<br>Paeonia anomala<br>subsp. veitchii<br>(Lynch) D.Y.Hong &<br>K.Y.Pan<br>[Paeoniaceae],<br>Angelica sinensis<br>(Oliv.) Diels<br>[Apiaceae], Sophora<br>flavescens Aiton<br>[Fabaceae], Lonicera<br>japonica Thunb.<br>[Caprifoliaceae],<br>Scrophularia<br>ningpoensis Hemsl.<br>[Scrophulariaceae],<br>Arctium lappa L.<br>[Asteraceae],<br>Cryptotympana<br>dubia (Haupt) |         |     |
|                |                    |                                                                          | <i>Rehmanniae radix<br/>recens, Moutan<br/>radicis cortex,<br/>Paeoniae radix<br/>rubra, Angelicae<br/>sinensis radix,<br/>Sophorae radix,<br/>Lonicerae flos,<br/>Scrophulariae<br/>radix, Arctii<br/>fructus, Cicadidae<br/>periostracum,<br/>Dictamni radicis<br/>cortex, Isatidis<br/>folium, Carthami<br/>flos,<br/>Saposhnikoviae<br/>radix</i> |                                                                                                                                                                                                                                                                                                                                                                                                                                                                                                                        | Granule | N N |



|                 |                   |                                                                                                                   |                                                                                                                                                                                                                            |                                                                                                                                                                                                                                                                   |         |   |   |
|-----------------|-------------------|-------------------------------------------------------------------------------------------------------------------|----------------------------------------------------------------------------------------------------------------------------------------------------------------------------------------------------------------------------|-------------------------------------------------------------------------------------------------------------------------------------------------------------------------------------------------------------------------------------------------------------------|---------|---|---|
|                 |                   |                                                                                                                   |                                                                                                                                                                                                                            | [Cicadidae],<br>Dictamnus<br>dasycarpus Turcz.<br>[Rutaceae], Isatis<br>tinctoria subsp.<br>tinctoria<br>[Brassicaceae],<br>Carthamus tinctorius<br>L. [Asteraceae],<br>Saposhnikovia<br>divaricata (Turcz. ex<br>Ledeb.) Schischk.<br>[Apiaceae]                 |         |   |   |
| Zheng<br>(2020) | Jueyin<br>granule | Commerci<br>al supplier<br>Shenzhen<br>China<br>Resources<br>Sanjiu<br>Modern<br>Chinese<br>Medicine<br>Co., Ltd. | <i>Lonicerae flos,</i><br><i>Concha haliotidis,</i><br><i>Moutan radialis</i><br><i>cortex,</i><br><i>Rehmanniae radix</i><br><i>recens, Isatidis</i><br><i>folium,</i><br><i>Hedyotis herba,</i><br><i>Curcumae radix</i> | Lonicera japonica<br>Thunb.<br>[Caprifoliaceae],<br>Concha haliotidis,<br>Paeonia × suffruticosa<br>Andrews<br>[Paeoniaceae],<br>Rehmannia glutinosa<br>(Gaertn.) DC.<br>[Orobanchaceae](Reh<br>manniae Radix<br>Recens), Isatis<br>tinctoria subsp.<br>tinctoria | Granule | N | N |

|               |                      |                                   |                                                                                                                                                                                                                                 |                                                                                                                                                                                                                                                                                                                                                                                         |           |   |   |
|---------------|----------------------|-----------------------------------|---------------------------------------------------------------------------------------------------------------------------------------------------------------------------------------------------------------------------------|-----------------------------------------------------------------------------------------------------------------------------------------------------------------------------------------------------------------------------------------------------------------------------------------------------------------------------------------------------------------------------------------|-----------|---|---|
|               |                      |                                   |                                                                                                                                                                                                                                 | [Brassicaceae],<br>Scleromitron<br>diffusum (Willd.)<br>R.J.Wang<br>[Rubiaceae],<br>Curcuma phaeocaulis<br>Valeton<br>[Zingiberaceae]                                                                                                                                                                                                                                                   |           |   |   |
| Jin<br>(2021) | Xiaoyin<br>decoction | Prepared<br>by<br>Researcher<br>s | <i>Rehmanniae radix<br/>recens,<br/>Lithospermi<br/>radix, Scutellariae<br/>radix, Lonicerae<br/>flos, Smilax<br/>glabrae rhizoma,<br/>Sanguisorbae<br/>radix, Hedyotidis<br/>herba, Persicae<br/>semen, Zaocys,<br/>Hirudo</i> | Rehmannia glutinosa<br>(Gaertn.) DC.<br>[Orobanchaceae](Reh<br>manniae Radix<br>Recens), Arnebia<br>euchroma (Royle ex<br>Benth.) I.M.Johnst.<br>[Boraginaceae],<br>Scutellaria baicalensis<br>Georgi [Lamiaceae],<br>Lonicera japonica<br>Thunb.<br>[Caprifoliaceae],<br>Smilax glabra Roxb.<br>[Smilacaceae],<br>Sanguisorbae Radix,<br>Scleromitron<br>diffusum (Willd.)<br>R.J.Wang | Decoction | N | N |

|            |              |                         |                                                                                                                                                                                                                                                                                                                                                                                                                  |                                                                                                                                                                                                                                                                                                                                                                               |           |   |   |
|------------|--------------|-------------------------|------------------------------------------------------------------------------------------------------------------------------------------------------------------------------------------------------------------------------------------------------------------------------------------------------------------------------------------------------------------------------------------------------------------|-------------------------------------------------------------------------------------------------------------------------------------------------------------------------------------------------------------------------------------------------------------------------------------------------------------------------------------------------------------------------------|-----------|---|---|
|            |              |                         |                                                                                                                                                                                                                                                                                                                                                                                                                  | [Rubiaceae], Prunus persica (L.) Batsch<br>[Rosaceae], Zaocys dhumnades Cantor<br>[Colubridae], Hirudo niponica Whitman<br>[Hirudinidae]                                                                                                                                                                                                                                      |           |   |   |
| Lan (2021) | Dangguiyinzi | Prepared by Researchers | <i>Angelica sinensis radix</i> ,<br><i>Paeonia lactiflora</i> ,<br><i>Lithospermis radix</i> ,<br><i>Rehmanniae radix recens</i> ,<br><i>Saposhnikoviae radix</i> ,<br><i>Schizonepetae spica</i> ,<br><i>Tribuli fructus</i> ,<br><i>Polygoni multiflori radix</i> ,<br><i>Asparagi tuber</i> ,<br><i>Liriopsis seu ophiopogonis tuber</i> ,<br><i>Salviae miltiorrhizae radix</i> ,<br><i>Sophorae radix</i> , | Angelica sinensis (Oliv.) Diels<br>[Apiaceae], Paeonia lactiflora Pall.<br>[Paeoniaceae](Paeonia lactiflora Alba),<br>Arnebia euchroma (Royle ex Benth.)<br>I.M.Johnst.<br>[Boraginaceae],<br>Rehmannia glutinosa (Gaertn.) DC.<br>[Orobanchaceae](Rehmanniae Radix Recens),<br>Saposhnikovia divaricata (Turcz. ex Ledeb.) Schischk.<br>[Apiaceae], Nepeta tenuifolia Benth. | Decoction | N | N |

|              |                       |                                   |                                                                                                       |                                                                                                                                                                                                                                                                                                                                                                                                                      |         |   |   |
|--------------|-----------------------|-----------------------------------|-------------------------------------------------------------------------------------------------------|----------------------------------------------------------------------------------------------------------------------------------------------------------------------------------------------------------------------------------------------------------------------------------------------------------------------------------------------------------------------------------------------------------------------|---------|---|---|
|              |                       |                                   | <i>Glycyrrhizae<br/>radix et rhizoma</i>                                                              | [Lamiaceae], Tribulus<br>terrestris L.<br>[Zygophyllaceae],<br>Reynoutria multiflora<br>(Thunb.) Moldenke<br>[Polygonaceae],<br>Asparagus<br>cochinchinensis<br>(Lour.) Merr.<br>[Asparagaceae],<br>Ophiopogon<br>japonicus (Thunb.)<br>Ker Gawl.<br>[Asparagaceae],<br>Salvia miltiorrhiza<br>Bunge [Lamiaceae],<br>Sophora flavescens<br>Aiton [Fabaceae],<br>Glycyrrhiza uralensis<br>Fisch. ex DC.<br>[Fabaceae] |         |   |   |
| Le<br>(2021) | Tianxian<br>decoction | Prepared<br>by<br>Researcher<br>s | <i>Smilacis chinae<br/>rhizoma,<br/>Rehmanniae radix<br/>recens,<br/>Trichosanthes<br/>kirilowii,</i> | Smilax china L.<br>[Smilacaceae],<br>Rehmannia glutinosa<br>(Gaertn.) DC.<br>[Orobanchaceae](Reh<br>manniae Radix                                                                                                                                                                                                                                                                                                    | Granule | N | N |

---

|                         |                       |
|-------------------------|-----------------------|
| <i>Anemarrhenae</i>     | Recens),              |
| <i>rhizoma,</i>         | Trichosanthes         |
| <i>Clerodendrum</i>     | kirilowii Maxim.      |
| <i>cyrtophyllum,</i>    | [Cucurbitaceae],      |
| <i>Phyllostachys</i>    | Anemarrhena           |
| <i>nigra, Paeoniae</i>  | asphodeloides Bunge   |
| <i>radix rubra ,</i>    | [Asparagaceae],       |
| <i>Dictamni radices</i> | Clerodendrum          |
| <i>cortex,</i>          | cyrtophyllum Turcz.   |
| <i>Saposhnikoviae</i>   | [Lamiaceae] ,         |
| <i>radix,</i>           | Phyllostachys nigra   |
| <i>Tripterygium</i>     | var. henonis          |
| <i>wilfordii,</i>       | (Mitford) Rendle      |
| <i>Hedyotis herba,</i>  | [Poaceae], Paeonia    |
| <i>Glycyrrhizae</i>     | anomala subsp.        |
| <i>radix et rhizoma</i> | veitchii (Lynch)      |
|                         | D.Y.Hong & K.Y.Pan    |
|                         | [Paeoniaceae] ,       |
|                         | Dictamnus             |
|                         | dasycarpus Turcz.     |
|                         | [Rutaceae],           |
|                         | Saposhnikovia         |
|                         | divaricata (Turcz. ex |
|                         | Ledeb.) Schischk.     |
|                         | [Apiaceae],           |
|                         | Tripterygium          |
|                         | wilfordii Hook.f.     |

---

|                |                                     |                                   |                                                                                                                                                                                                                                                                                                                    |                                                                                                                                                                                                                                                                                                                                                                                            |           |   |   |
|----------------|-------------------------------------|-----------------------------------|--------------------------------------------------------------------------------------------------------------------------------------------------------------------------------------------------------------------------------------------------------------------------------------------------------------------|--------------------------------------------------------------------------------------------------------------------------------------------------------------------------------------------------------------------------------------------------------------------------------------------------------------------------------------------------------------------------------------------|-----------|---|---|
|                |                                     |                                   |                                                                                                                                                                                                                                                                                                                    | [Celastraceae],<br>Scleromitron<br>diffusum (Willd.)<br>R.J.Wang<br>[Rubiaceae],<br>Glycyrrhiza uralensis<br>Fisch. ex DC.<br>[Fabaceae]                                                                                                                                                                                                                                                   |           |   |   |
| Tang<br>(2021) | Qingreyangx<br>uejiedu<br>decoction | Prepared<br>by<br>Researcher<br>s | <i>Rehmanniae radix<br/>recens,<br/>Trichosanthes<br/>kirilowii,<br/>Angelicae<br/>sinensis radix,<br/>Salviae<br/>miltiorrhizae<br/>radix, Paeonia<br/>lactiflora,<br/>Paeoniae radix<br/>rubra, Spatholobi<br/>caulis, Dictamni<br/>radicis cortex,<br/>Smilax glabrae<br/>rhizoma, Lycii<br/>radicis cortex</i> | Rehmannia glutinosa<br>(Gaertn.) DC.<br>[Orobanchaceae](Reh<br>manniae Radix<br>Recens),<br>Trichosanthes<br>kirilowii Maxim.<br>[Cucurbitaceae],<br>Angelica sinensis<br>(Oliv.) Diels<br>[Apiaceae], Salvia<br>miltiorrhiza Bunge<br>[Lamiaceae], Paeonia<br>lactiflora Pall.<br>[Paeoniaceae](Paeoni<br>a lactiflora Alba),<br>Paeonia anomala<br>subsp. veitchii<br>(Lynch) D.Y.Hong & | Decoction | N | N |

|                |                              |                                   |                                                                                                                                                                                                                                                                                                                                                                                                   |                                                                                                                                                                                                                                                                                              |           |   |   |
|----------------|------------------------------|-----------------------------------|---------------------------------------------------------------------------------------------------------------------------------------------------------------------------------------------------------------------------------------------------------------------------------------------------------------------------------------------------------------------------------------------------|----------------------------------------------------------------------------------------------------------------------------------------------------------------------------------------------------------------------------------------------------------------------------------------------|-----------|---|---|
|                |                              |                                   |                                                                                                                                                                                                                                                                                                                                                                                                   | K.Y.Pan<br>[Paeoniaceae],<br>Spatholobus<br>suberectus Dunn<br>[Fabaceae],<br>Dictamnus<br>dasycarpus Turcz.<br>[Rutaceae], Smilax<br>glabra Roxb.<br>[Smilacaceae],<br>Lycium barbarum L.<br>[Solanaceae]                                                                                   |           |   |   |
| Wang<br>(2021) | Qingreliangx<br>ue decoction | Prepared<br>by<br>Researcher<br>s | <i>Astragali Radix,</i><br><i>Poria sclerotium,</i><br><i>Atractylodis</i><br><i>rhizoma alba,</i><br><i>Rehmanniae radix</i><br><i>recens, Moutan</i><br><i>radicis cortex,</i><br><i>Paeoniae radix</i><br><i>rOubra, Kochiae</i><br><i>fructus, Dictamni</i><br><i>radicis cortex,</i><br><i>Isatidis radix,</i><br><i>Isatidis folium,</i><br><i>Rubiae radix,</i><br><i>Prunellae spica,</i> | Astragalus<br>mongholicus Bunge<br>[Fabaceae, Poria<br>cocos Wolf<br>[Polyporaceae],<br>Atractylodes lancea<br>(Thunb.) DC.<br>[Asteraceae],<br>Rehmannia glutinosa<br>(Gaertn.) DC.<br>[Orobanchaceae](Reh<br>manniae Radix<br>Recens), Paeonia ×<br>suffruticosa Andrews<br>[Paeoniaceae], | Decoction | N | N |

---

|                          |                          |
|--------------------------|--------------------------|
| <i>Curcumae radix,</i>   | Paeonia anomala          |
| <i>Polygoni</i>          | subsp. veitchii          |
| <i>multiflori radix,</i> | (Lynch) D.Y.Hong &       |
| <i>Ecliptae herba</i>    | K.Y.Pan                  |
|                          | [Paeoniaceae], Bassia    |
|                          | scoparia (L.) A.J.Scott  |
|                          | [Amaranthaceae],         |
|                          | Dictamnus                |
|                          | dasycarpus Turcz.        |
|                          | [Rutaceae], Isatis       |
|                          | tinctoria subsp.         |
|                          | tinctoria                |
|                          | [Brassicaceae](Isatidis  |
|                          | Radix), Isatis tinctoria |
|                          | subsp. tinctoria         |
|                          | [Brassicaceae], Rubia    |
|                          | tinctorum L.             |
|                          | [Rubiaceae], Prunella    |
|                          | vulgaris L.              |
|                          | [Lamiaceae],             |
|                          | Curcuma phaeocaulis      |
|                          | Valeton                  |
|                          | [Zingiberaceae],         |
|                          | Reynoutria multiflora    |
|                          | (Thunb.) Moldenke        |
|                          | [Polygonaceae],          |
|                          | Eclipta prostrata (L.)   |

---



---

L. [Asteraceae]

---

Latin names of herbs are based on the standard nomenclature of the Korean Pharmacopoeia (<https://nifds.go.kr/nhmi/main.do>); scientific names of herbs are based on the Medicinal Plant Names Services (MPNS, [https://mpns.science.kew.org/mpns-portal/?\\_ga=1.111763972.1427522246.1459077346](https://mpns.science.kew.org/mpns-portal/?_ga=1.111763972.1427522246.1459077346)) provided by the Royal Botanic Gardens, Kew.
