# Supplementary material
Source: MDPI journal article supplement (https://www.mdpi.com/1424-8247/16/8/1160)
Supplement: s1 [file s1]

**Supplementary Table S1.** Search terms used in each databases**Medline**

|    | Searches                                                                                                                                                                                                                                                                                                                                                                                                                                                                                                     | Results    |
|----|--------------------------------------------------------------------------------------------------------------------------------------------------------------------------------------------------------------------------------------------------------------------------------------------------------------------------------------------------------------------------------------------------------------------------------------------------------------------------------------------------------------|------------|
| #1 | Psoriasis[Mesh]                                                                                                                                                                                                                                                                                                                                                                                                                                                                                              | 42404      |
| #2 | (Psoriasis[Title/Abstract]) OR (Pustulosis of Palms[Title/Abstract] AND Soles[Title/Abstract]) OR (Pustulosis Palmaris et Plantaris[Title/Abstract]) OR (Palmoplantaris Pustulosis[Title/Abstract]) OR (Pustular Psoriasis of Palms[Title/Abstract] AND Soles[Title/Abstract])                                                                                                                                                                                                                               | 188        |
| #3 | “Plants, Medicinal”[MeSH] OR “Drugs, Chinese Herbal”[MeSH] OR “Medicine, Chinese Traditional”[MeSH] OR “Medicine, Kampo”[MeSH] OR “Medicine, Korean Traditional”[MeSH] OR “Herbal Medicine”[MeSH] OR “Prescription Drugs”[MeSH] OR “traditional Korean medicine”[Title/abstract] OR “traditional Chinese medicine”[Title/abstract] OR “traditional oriental medicine”[Title/abstract] OR “Kampo medicine”[Title/abstract] OR herb*[Title/abstract] OR decoction*[Title/abstract] OR botanic*[Title/abstract] | 234484     |
| #4 | #1 AND #2 AND #3                                                                                                                                                                                                                                                                                                                                                                                                                                                                                             | <b>283</b> |

**EMBASE**

|    | Searches                                                                                                                                                                                                                                                                                                                                                                                                                                                                                                                                                                                 | Results   |
|----|------------------------------------------------------------------------------------------------------------------------------------------------------------------------------------------------------------------------------------------------------------------------------------------------------------------------------------------------------------------------------------------------------------------------------------------------------------------------------------------------------------------------------------------------------------------------------------------|-----------|
| #1 | 'Psoriasis'/exp                                                                                                                                                                                                                                                                                                                                                                                                                                                                                                                                                                          | 106,080   |
| #2 | 'Psoriasis' OR 'Pustulosis of Palms and Soles' OR 'Pustulosis Palmaris et Plantaris' OR 'Palmoplantaris' OR 'Pustulosis' OR 'Pustular Psoriasis of Palms and Soles'                                                                                                                                                                                                                                                                                                                                                                                                                      | 5857      |
| #3 | 'medicinal plant'/exp OR 'medicinal plant' OR 'herbaceous agent'/exp OR 'herbaceous agent' OR 'chinese medicine'/exp OR 'chinese medicine' OR 'kampo medicine'/exp OR 'kampo medicine' OR 'kampo medicine (drug)'/exp OR 'kampo medicine (drug)' OR 'korean medicine'/exp OR 'korean medicine' OR 'herbal medicine'/exp OR 'herbal medicine' OR 'prescription drug'/exp OR 'prescription drug' OR 'oriental medicine'/exp OR 'oriental medicine' OR 'alternative medicine'/exp OR 'alternative medicine' OR 'complementary medicine' OR 'herb'/exp OR 'herb' OR 'decoction' OR 'botanic' | 585795    |
| #4 | #1 AND #2 AND #3                                                                                                                                                                                                                                                                                                                                                                                                                                                                                                                                                                         | <b>63</b> |

**CENTRAL**

|    | Searches                                                                                                                                                                  | Results |
|----|---------------------------------------------------------------------------------------------------------------------------------------------------------------------------|---------|
| #1 | MeSH descriptor: [Psoriasis] explode all trees                                                                                                                            | 3442    |
| #2 | (“Psoriasis” OR “Pustulosis of Palms and Soles” OR “Palmoplantaris Pustulosis” OR “Pustulosis Palmaris et Plantaris” OR “Pustular Psoriasis of Palms and Soles”):ti,ab,kw | 11      |
| #3 | MeSH descriptor: [Plants, Medicinal] explode all trees                                                                                                                    | 946     |
| #4 | MeSH descriptor: [Drugs, Chinese Herbal] explode all trees                                                                                                                | 3645    |
| #5 | MeSH descriptor: [Medicine, Chinese Traditional] explode all trees                                                                                                        | 1219    |

|     |                                                                                                                                                                      |       |
|-----|----------------------------------------------------------------------------------------------------------------------------------------------------------------------|-------|
| #6  | MeSH descriptor: [Medicine, Kampo] explode all trees                                                                                                                 | 46    |
| #7  | MeSH descriptor: [Medicine, Korean Traditional] explode all trees                                                                                                    | 33    |
| #8  | MeSH descriptor: [Herbal Medicine] explode all trees                                                                                                                 | 63    |
| #9  | MeSH descriptor: [Prescription Drugs] explode all trees                                                                                                              | 108   |
| #10 | ("traditional Korean medicine" OR "traditional Chinese medicine" OR "Traditional oriental medicine" OR "Kampo medicine" OR herb* OR decoction* OR botanic*);ti,ab,kw | 18819 |
| #11 | (#1 OR #2) AND (#3 OR #4 OR #5 OR #6 OR #7 OR #8 OR #9 OR #10) in Trials                                                                                             | 48    |

## OASIS

|    | Searches  | Results |
|----|-----------|---------|
| #1 | 건선 AND 한약 | 5       |

## KISS

|    | Searches  | Results |
|----|-----------|---------|
| #1 | 건선 AND 한약 | 3       |

## RISS

|    | Searches  | Results |
|----|-----------|---------|
| #1 | 건선 AND 한약 | 2       |

## KCI

|    | Searches  | Results |
|----|-----------|---------|
| #1 | 건선 AND 한약 | 7       |

## CNKI

|    | Searches                                                                                                                                                                                                                                                                                                                                                                                      | Results |
|----|-----------------------------------------------------------------------------------------------------------------------------------------------------------------------------------------------------------------------------------------------------------------------------------------------------------------------------------------------------------------------------------------------|---------|
| #1 | (TI='银屑病' OR '牛皮癣' OR '白疔' OR '寻常型银屑病' OR '点滴型银屑病' OR + '银屑病关节炎' OR '脓疱型银屑病' OR '关节病型银屑病') AND (TI='中药' OR '中医药' OR '中草药' OR '本草' OR '汤' OR '丸' OR '散' OR '方' OR '颗粒' OR '胶囊' OR '自拟') AND (AB='银屑病' OR '牛皮癣' OR '白疔' OR '寻常型银屑病' OR '点滴型银屑病' OR '银屑病关节炎' OR '脓疱型银屑病' OR '关节病型银屑病') AND (AB='中药' OR '中医药' OR '中草药' OR '本草' OR '汤' OR '丸' OR '散' OR '方' OR '颗粒' OR '胶囊' OR '自拟') AND (AB='随机') | 1161    |

## Wanfang data

|    | Searches                                                                                                                                                                                                                                             | Results |
|----|------------------------------------------------------------------------------------------------------------------------------------------------------------------------------------------------------------------------------------------------------|---------|
| #1 | 题名:("银屑病"or"牛皮癣"or"白疔"or"寻常型银屑病"or"点滴型银屑病"or "银屑病关节炎"or "脓疱型银屑病"or "关节病型银屑病") and 题名:("汤" or "丸" or "散" or "中药") and 摘要:("银屑病"or"牛皮癣"or"白疔"or"寻常型银屑病"or "点滴型银屑病"or "银屑病关节炎"or "脓疱型银屑病"or "关节病型银屑病") and 摘要:("汤" or "丸" or "散" or "中药") and 摘要:("随机") | 813     |

## CiNii

|    | Searches                                                                                                                                                                                                                                                                                                                                                           | Results |
|----|--------------------------------------------------------------------------------------------------------------------------------------------------------------------------------------------------------------------------------------------------------------------------------------------------------------------------------------------------------------------|---------|
| #1 | (“银屑病” OR “Psoriasis” OR “Pustulosis of Palms and Soles” OR “Palmoplantar Pustulosis” OR “Pustulosis Palmaris et Plantaris” OR “Pustular Psoriasis of Palms and Soles” ) AND (“traditional Korean medicine” OR “traditional Chinese medicine” OR “Traditional oriental medicine” OR “Kampo medicine” OR herb OR decoction OR botanic OR 漢方薬 OR ハーブ OR 散 OR 湯 OR 丸) | 49      |
